# Supplementary material for: Enantioselective Cu-catalyzed 1,4-additions of organozinc and Grignard reagents to enones: exceptional performance of the hydrido-phosphite-ligand BIFOP-H
Source: Royal Society of Chemistry journal article supplement (doi:10.1039/c8nj05886e), 2019-01-01
Supplement: c8nj05886e1.pdf [file c8nj05886e1.pdf]

# Supporting Information

## Enantioselective Cu-Catalyzed 1,4-Additions of Organozinc and Grignard Reagents to Enones: Exceptional Performance of the Hydrido-Phosphite-Ligand BIFOP-H

Eric Brüllingen, Jörg-Martin Neudörfl and Bernd Goldfuss\*

University of Cologne

**New Journal of Chemistry**

## Table of Contents

|                                                                            |        |
|----------------------------------------------------------------------------|--------|
| Experimental (general methods)                                             | p. 3   |
| X-ray crystal structure (data)                                             | p. 4   |
| HPLC-chromatogram s                                                        | p. 6   |
| GC-chromatograms                                                           | p. 8   |
| Computational structures (geometries, TS, energies, imaginary frequencies) | p. 11  |
| Additional Computed reaction pathways of the MeCu-catalyzed 1,4-addition   | p. 176 |
| Literature                                                                 | p. 179 |

## Experimental

### General procedure for the synthesis of (*R*)-3-ethyl-1,3-diphenylpropan-1-one, (*R*)-1,3-diphenylpentan-1-one (15a) or (*R*)-3-methyl-1,3-diphenylpropan-1-one, (*R*)-1,3-diphenylbutan-1-one (15b)

CuCl (0.01 mmol, 1.0 mg, 1 mol%) and **L** (0.02 mmol, s.b., 2 mol%) are dissolved in dry and absolute Et<sub>2</sub>O (3.0 mL) and the mixture is stirred at room temperature for 10 min. The mixture is cooled to -78°C and subsequently 1.5 eq. of the corresponding Grignard reagent (EtMgBr or MeMgBr) in solvent are added dropwise. The reaction mixture is stirred at -78°C for another 10 min. Then the chalcone (1.0 mmol, 208 mg, 1.0 eq.) is added portionwise over 1 h. The reaction mixture is stirred for 6 h (full conversion is determined) and quenched with saturated aqueous NH<sub>4</sub>Cl solution (3 mL). The mixture is separated and the water layer is extracted with DCM (2×5 mL). The combined organic layers are dried over Na<sub>2</sub>SO<sub>4</sub>, filtered and the solvent is evaporated under *vacuo*. Purification by flash chromatography over silica gel, using Et<sub>2</sub>O:*n*-hexane 1:20 (R<sub>f</sub> = 0.1) afforded the desired product.

**L** = PPh<sub>3</sub>, 5.3 mg, racemic product is formed.

**L** = BIFOP-H, 9.8 mg, enantioselective (*R*)-product is formed.

### General procedure for the synthesis of (*R*)-3-ethylcyclohexanone (16a)

CuCl (0.01 mmol, 1.0 mg, 1 mol%) and **L** (0.02 mmol, s.b., 2 mol%) are dissolved in dry and absolute Et<sub>2</sub>O (3.0 mL) and the mixture is stirred at room temperature for 10 min. The mixture is cooled to -78°C and subsequently 1.5 eq. of the Grignard reagent (EtMgBr) in solvent is added dropwise. The reaction mixture is stirred at -78°C for another 10 min. Then the cyclohexenone (1.0 mmol, 0.1 mL, 1.0 eq.) is added dropwise over 1 h. The reaction mixture is stirred for 6 h (full conversion is determined) and quenched with saturated aqueous NH<sub>4</sub>Cl solution (3 mL). The mixture is separated and the water layer is extracted with DCM (2×5 mL). The combined organic layers are dried over Na<sub>2</sub>SO<sub>4</sub>, filtered and the solvent is evaporated under *vacuo*. Purification by flash chromatography over silica gel, using EtOAc:*n*-hexane 1:2 (R<sub>f</sub> = 0.35) afforded the desired product (with MeMgBr no product is observed).

**L** = PPh<sub>3</sub>, 5.3 mg, racemic product is formed.

**L** = BIFOP-H, 9.8 mg, enantioselective (*R*)-product is formed.

### General procedure for the synthesis of 2-ethylchroman-4-one (17a) or 2-methylchroman-4-one (17b)

CuCl (0.01 mmol, 1.0 mg, 1 mol%) and **L** (0.02 mmol, s.b., 2 mol%) are dissolved in dry and absolute Et<sub>2</sub>O (3.0 mL) and the mixture is stirred at room temperature for 10 min. The mixture is cooled to -78°C and subsequently 1.5 eq. of the corresponding Grignard reagent (EtMgBr or MeMgBr) in solvent are added dropwise. The reaction mixture is stirred at -78°C for another 10 min. Then the chromone (1.0 mmol, 146 mg, 1.0 eq.) is added portionwise over 1 h. The reaction mixture is stirred for 6 h (full conversion is determined) and quenched with saturated aqueous NH<sub>4</sub>Cl solution (3 mL). The mixture is separated and the water layer is extracted with DCM (2×5 mL). The combined organic layers are dried over Na<sub>2</sub>SO<sub>4</sub>, filtered and the solvent is evaporated under *vacuo*. Purification by flash chromatography over silica gel, using Et<sub>2</sub>O:*n*-hexane 1:10 (R<sub>f</sub> = 0.25) afforded the desired product.

L = PPh<sub>3</sub>, 5.3 mg, or BIFOP-H, 9.8 mg, racemic product is formed.

### X-ray crystal structure

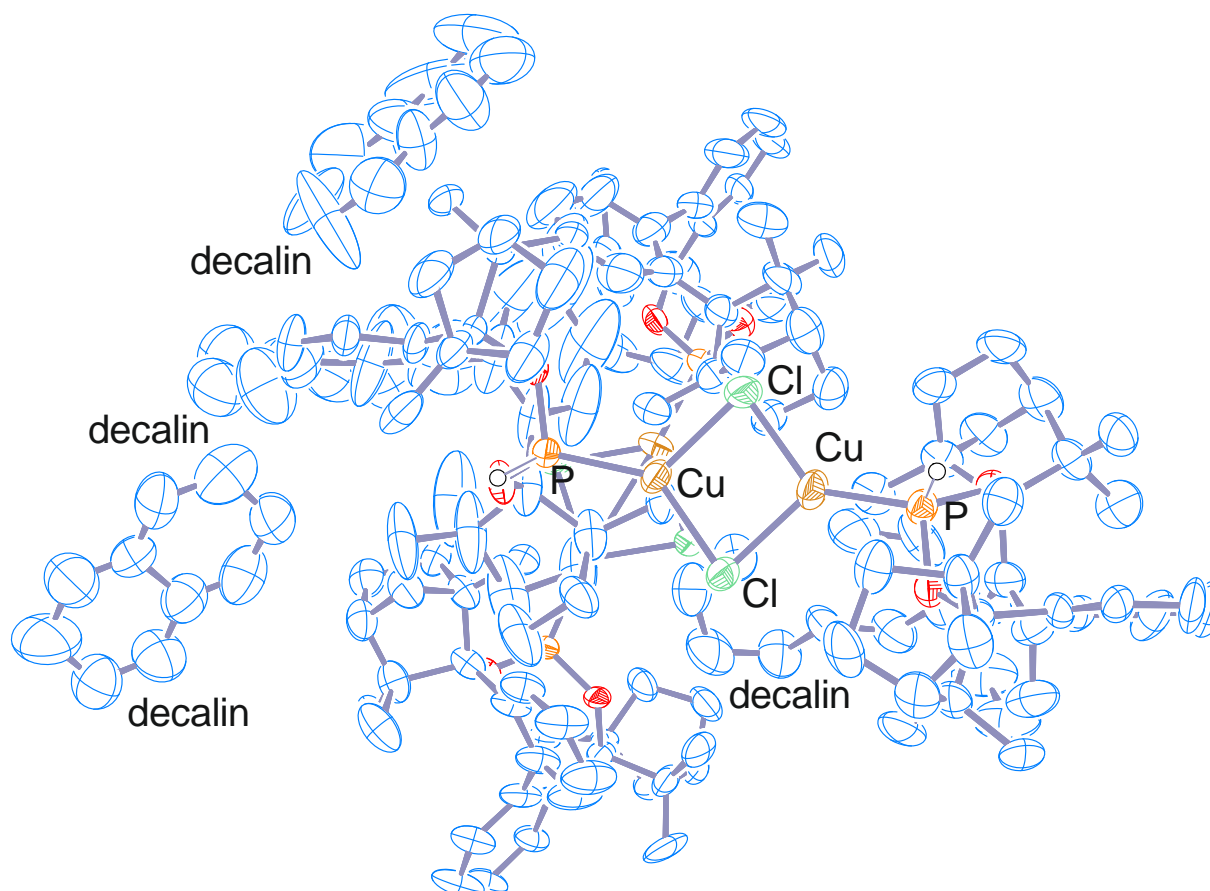

**Figure 1:** Full X-ray crystal structure (CCDC 1862862) of BIFOP-H • CuCl building up dimers in decalin. The hydrogen atoms at the phosphorus moiety are located from difference in electron maps and refined freely by the crystallographer. The C-H-hydrogens are omitted for clarity. The ellipsoids are shown with 50% probability. Two dimer structures are shown together with four (highly disordered) decalin molecules.

**Table 1.** Crystal data and structure refinement for eb214\_neu3\_sq (Figure 1).

|                      |                                                                                                                                                                      |          |
|----------------------|----------------------------------------------------------------------------------------------------------------------------------------------------------------------|----------|
| Identification code  | eb214_neu3_sq                                                                                                                                                        |          |
| Empirical formula    | C <sub>84</sub> H <sub>118</sub> Cl <sub>2</sub> Cu <sub>2</sub> O <sub>4</sub> P <sub>2</sub>                                                                       |          |
| Moiety formula       | C <sub>64</sub> H <sub>82</sub> Cl <sub>2</sub> Cu <sub>2</sub> O <sub>4</sub> P <sub>2</sub> , C <sub>10</sub> H <sub>18</sub> [+ C <sub>10</sub> H <sub>18</sub> ] |          |
| Formula weight       | 1451.70                                                                                                                                                              |          |
| Temperature          | 100(2) K                                                                                                                                                             |          |
| Wavelength           | 1.54178 Å                                                                                                                                                            |          |
| Crystal system       | Monoclinic                                                                                                                                                           |          |
| Space group          | P2 <sub>1</sub>                                                                                                                                                      |          |
| Unit cell dimensions | a = 15.1193(16) Å                                                                                                                                                    | a = 90°. |

|                                        |                                                              |                         |
|----------------------------------------|--------------------------------------------------------------|-------------------------|
|                                        | $b = 31.626(4) \text{ \AA}$                                  | $b = 90.221(5)^\circ$ . |
|                                        | $c = 15.4815(17) \text{ \AA}$                                | $g = 90^\circ$ .        |
| Volume                                 | $7402.6(15) \text{ \AA}^3$                                   |                         |
| Z                                      | 4                                                            |                         |
| Density (calculated)                   | $1.303 \text{ Mg/m}^3$                                       |                         |
| Absorption coefficient                 | $2.163 \text{ mm}^{-1}$                                      |                         |
| F(000)                                 | 3104                                                         |                         |
| Crystal size                           | $0.200 \times 0.200 \times 0.020 \text{ mm}^3$               |                         |
| Theta range for data collection        | $2.854 \text{ to } 75.926^\circ$ .                           |                         |
| Index ranges                           | $-18 \leq h \leq 14, -38 \leq k \leq 38, -19 \leq l \leq 18$ |                         |
| Reflections collected                  | 80865                                                        |                         |
| Independent reflections                | 27388 [R(int) = 0.0564]                                      |                         |
| Completeness to theta = $67.679^\circ$ | 96.3 %                                                       |                         |
| Absorption correction                  | Semi-empirical from equivalents                              |                         |
| Max. and min. transmission             | 0.3239 and 0.1972                                            |                         |
| Refinement method                      | Full-matrix least-squares on $F^2$                           |                         |
| Data / restraints / parameters         | 27388 / 1 / 1553                                             |                         |
| Goodness-of-fit on $F^2$               | 1.048                                                        |                         |
| Final R indices [ $I > 2\sigma(I)$ ]   | $R1 = 0.0698, wR2 = 0.1781$                                  |                         |
| R indices (all data)                   | $R1 = 0.0867, wR2 = 0.1878$                                  |                         |
| Absolute structure parameter           | 0.095(5)                                                     |                         |
| Extinction coefficient                 | n/a                                                          |                         |
| Largest diff. peak and hole            | 0.662 and $-0.412 \text{ e.\AA}^{-3}$                        |                         |

## HPLC-spectra

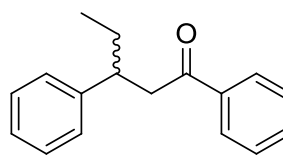

rac-Standard of 1,3-diphenylpentan-1-one (**15a**)

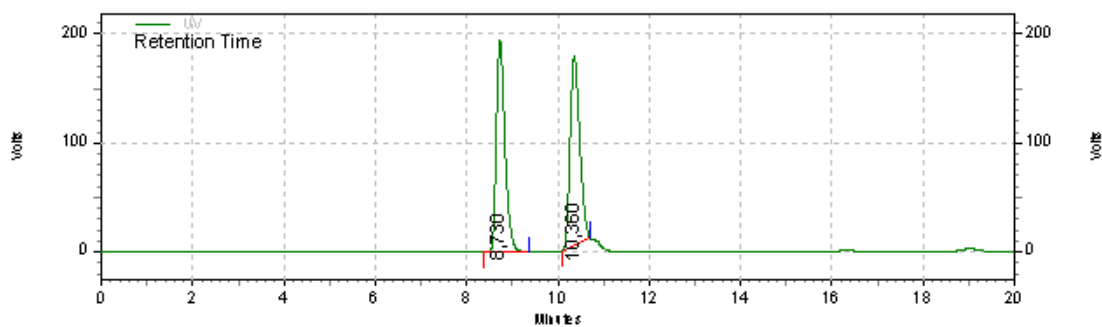

### UV Results

| Retention Time | Area     | Area % | Height | Height % |
|----------------|----------|--------|--------|----------|
| 8,730          | 10147971 | 49,98  | 778986 | 52,89    |
| 10,360         | 10155275 | 50,02  | 693806 | 47,11    |

| Totals | Area     | Area % | Height  | Height % |
|--------|----------|--------|---------|----------|
|        | 20303246 | 100,00 | 1472792 | 100,00   |

(*R*)-1,3-diphenylpentan-1-one ((*R*)-**15a**) after Enantioselective Cu-Catalyzed 1,4-Addition

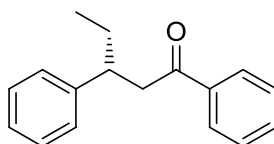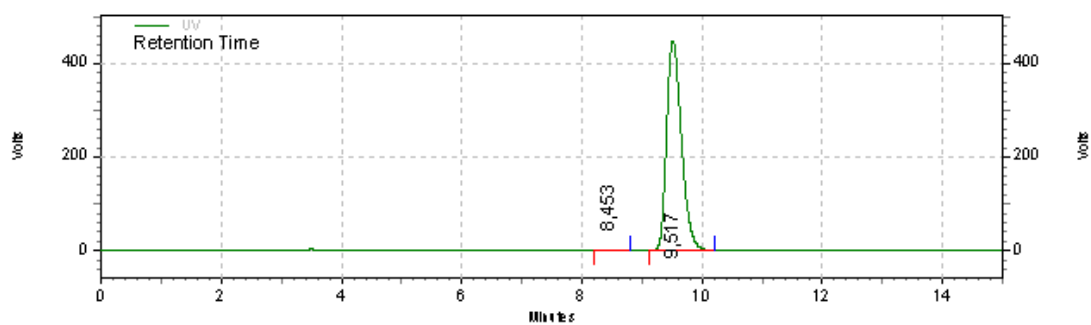

### UV Results

| Retention Time | Area     | Area % | Height  | Height % |
|----------------|----------|--------|---------|----------|
| 8,453          | 113763   | 0,37   | 7829    | 0,44     |
| 9,517          | 30678407 | 99,63  | 1790349 | 99,56    |

| Totals | Area     | Area % | Height  | Height % |
|--------|----------|--------|---------|----------|
|        | 30792170 | 100,00 | 1798178 | 100,00   |

rac-Standard of 1,3-diphenylbutan-1-one (**15b**)

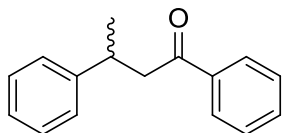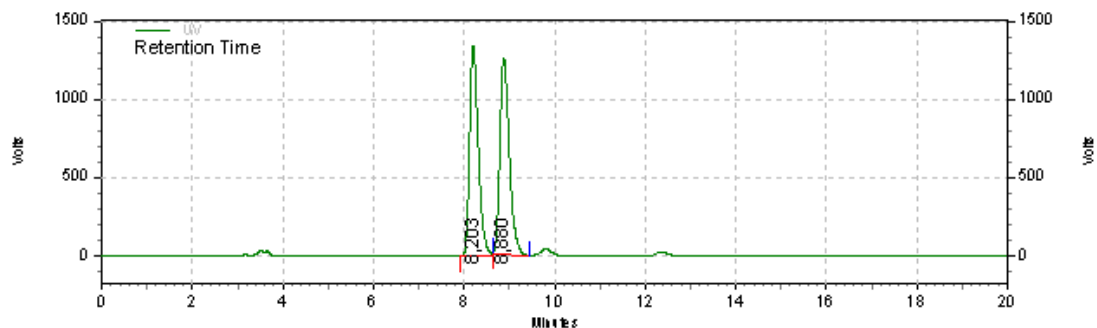

UV Results

| Retention Time | Area     | Area % | Height  | Height % |
|----------------|----------|--------|---------|----------|
| 8,203          | 72650902 | 50,12  | 5389063 | 51,81    |
| 8,880          | 72307876 | 49,88  | 5011559 | 48,19    |

|        |           |        |          |        |
|--------|-----------|--------|----------|--------|
| Totals | 144958778 | 100,00 | 10400622 | 100,00 |
|--------|-----------|--------|----------|--------|

(*R*)-1,3-diphenylbutan-1-one ((*R*)-**15b**) after Enantioselective Cu-Catalyzed 1,4-Addition

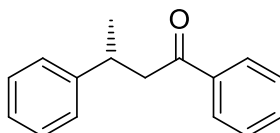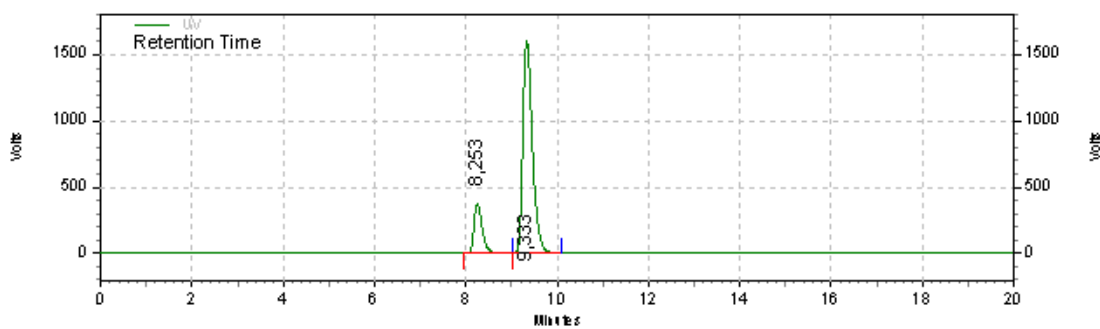

UV Results

| Retention Time | Area     | Area % | Height  | Height % |
|----------------|----------|--------|---------|----------|
| 8,253          | 18496971 | 16,56  | 1488155 | 18,79    |
| 9,333          | 93183652 | 83,44  | 6430569 | 81,21    |

|        |           |        |         |        |
|--------|-----------|--------|---------|--------|
| Totals | 111680623 | 100,00 | 7918724 | 100,00 |
|--------|-----------|--------|---------|--------|

# GC-spectra

## rac-Standard of 3-ethylcyclohexan-1-one (16a)

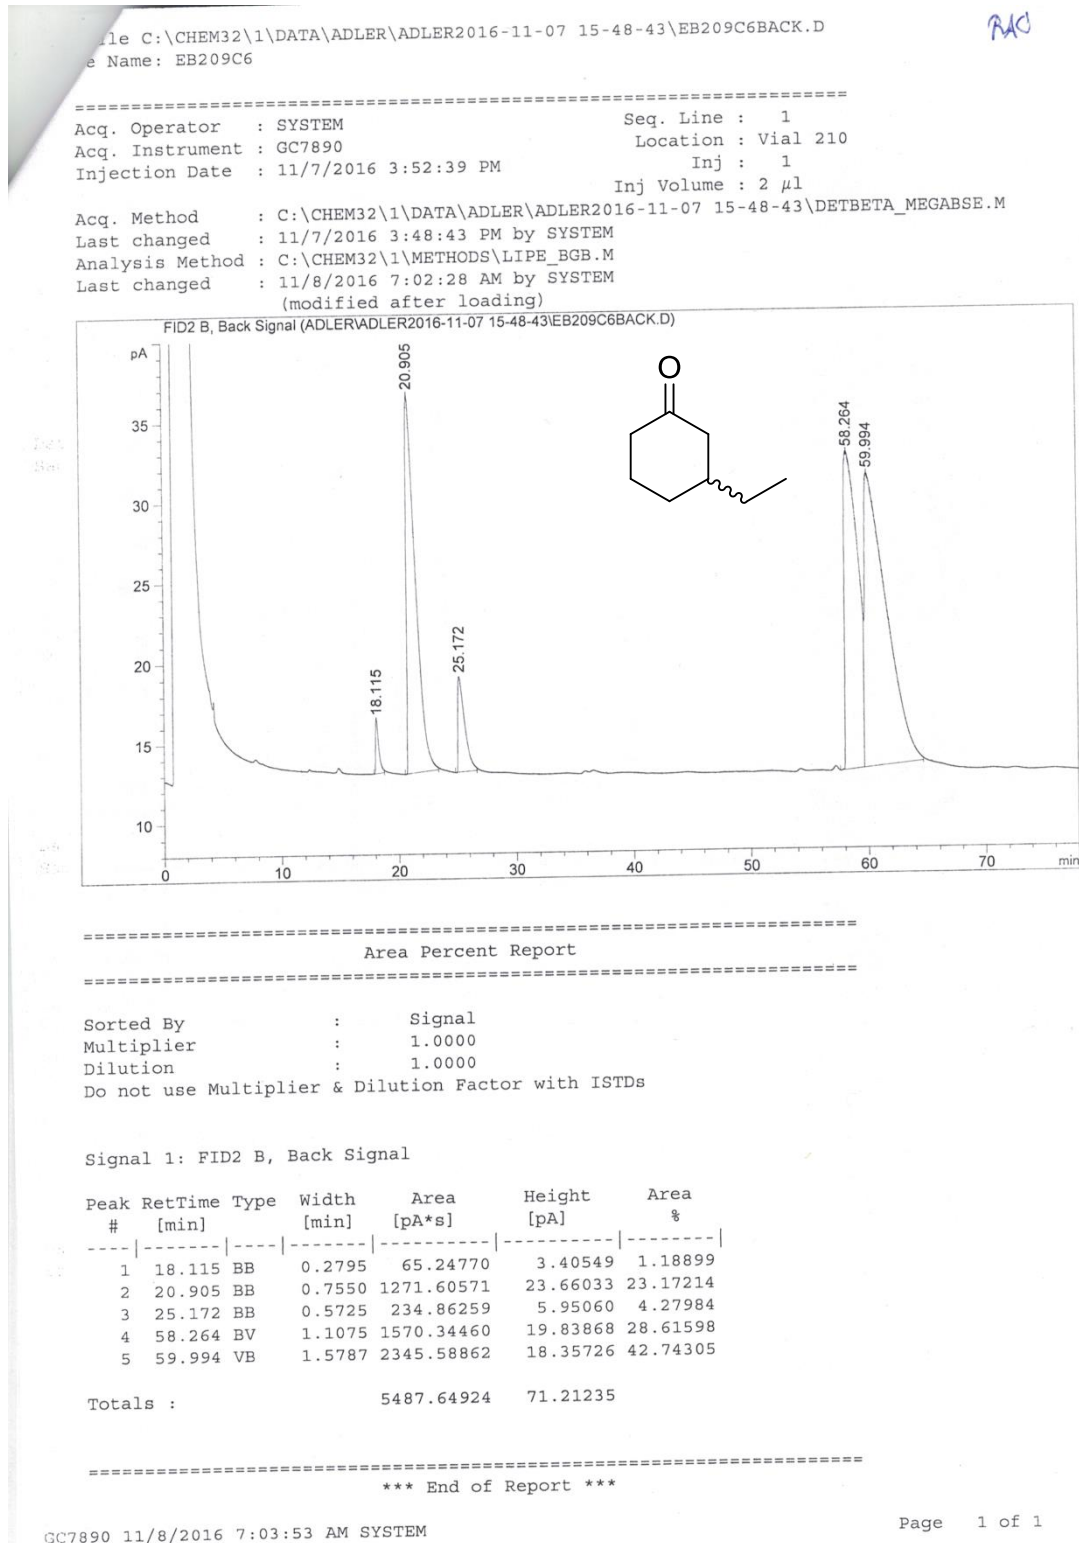



(R)-3-ethylcyclohexan-1-one ((R)-16a)

16 C:\CHEM32\1\DATA\ADLER\ADLERDUAL2016-09-28 16-16-07\EB200CBACK.D  
Name: eb200c *Int2*

=====

|                 |                                      |           |            |
|-----------------|--------------------------------------|-----------|------------|
| Acq. Operator   | : SYSTEM                             | Seq. Line | : 1        |
|                 |                                      | Location  | : Vial 204 |
| Injection Date  | : 9/28/2016 12:03:54 PM              | Inj       | : 1        |
| Acq. Method     | : DETBETA_MEGABSE.M                  |           |            |
| Analysis Method | : C:\CHEM32\1\METHODS\LIPE_BGB_WS3.M |           |            |
| Last changed    | : 9/29/2016 9:39:45 AM by SYSTEM     |           |            |

(modified after loading)

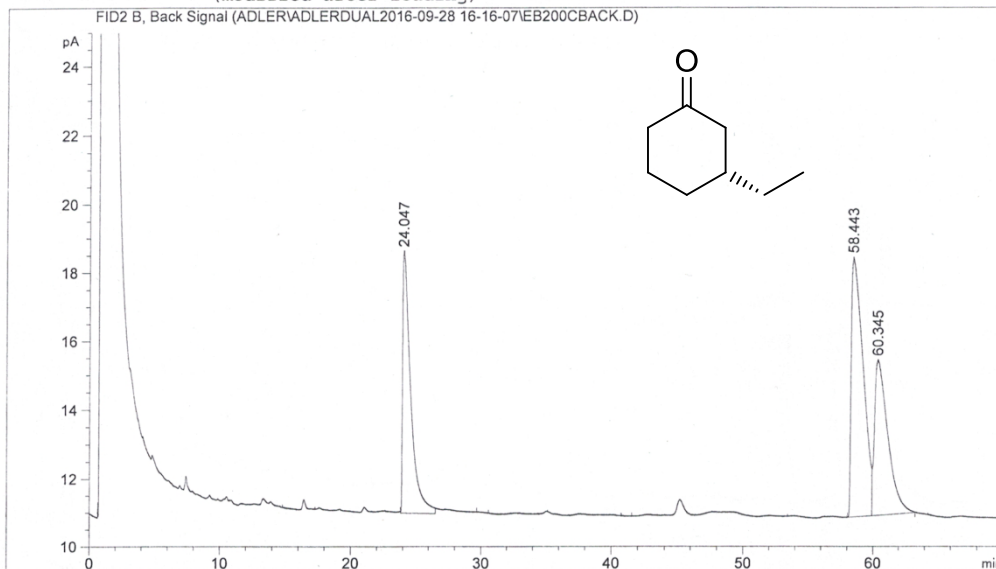

=====  
Area Percent Report  
=====

Sorted By : Signal  
Multiplier : 1.0000  
Dilution : 1.0000  
Do not use Multiplier & Dilution Factor with ISTDs

Signal 1: FID2 B, Back Signal

| Peak # | RetTime [min] | Type | Width [min] | Area [pA*s] | Height [pA] | Area %   |
|--------|---------------|------|-------------|-------------|-------------|----------|
| 1      | 24.047        | VV   | 0.5550      | 335.85663   | 7.63744     | 29.37475 |
| 2      | 58.443        | VV   | 0.7462      | 481.12796   | 7.56334     | 42.08049 |
| 3      | 60.345        | VB   | 0.8506      | 326.36691   | 4.51874     | 28.54476 |

Totals : 1143.35150 19.71952

=====  
\*\*\* End of Report \*\*\*

rac-Standard of 3-methylcyclohexan-1-one (16b), 1-methylcyclohexen-1-ol is also present

File C:\CHEM32\1\DATA\ADLER\ADLERDUAL2016-09-28 12-02-33\EB201BBACK2.D  
Name: eb201b *Methyl*

```
=====
Acq. Operator   : SYSTEM                      Seq. Line :    1
                                           Location  : Vial 201
                                           Inj       :    1
Injection Date  : 9/28/2016 12:03:54 PM
Acq. Method    : DETBETA_MEGABSE.M
Analysis Method: C:\CHEM32\1\DATA\MARTIN\MARTINDUAL2016-09-26 15-29-46\DETBETA_MEGABSE
                                           .M (Sequence Method)
Last changed   : 9/28/2016 2:27:21 PM by SYSTEM
                                           (modified after loading)
=====
```

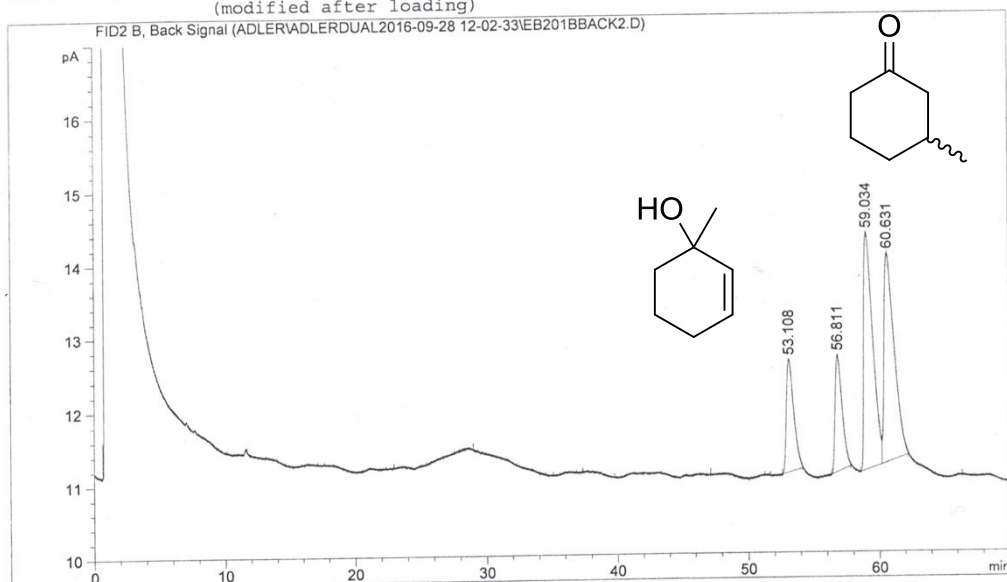

```
=====
                        Area Percent Report
=====
```

```
Sorted By      : Signal
Multiplier     : 1.0000
Dilution      : 1.0000
Do not use Multiplier & Dilution Factor with ISTDs
```

Signal 1: FID2 B, Back Signal

| Peak # | RetTime [min] | Type | Width [min] | Area [pA*s] | Height [pA] | Area %   |
|--------|---------------|------|-------------|-------------|-------------|----------|
| 1      | 53.108        | BB   | 0.4692      | 60.03876    | 1.51881     | 14.00889 |
| 2      | 56.811        | BB   | 0.4416      | 58.43823    | 1.57236     | 13.63543 |
| 3      | 59.034        | BV   | 0.5697      | 154.78496   | 3.21507     | 36.11608 |
| 4      | 60.631        | VB   | 0.6474      | 155.31432   | 2.83406     | 36.23960 |

Totals :                               428.57626     9.14030

```
=====
*** End of Report ***
```

## Computational structures

**Table 2.** Computed transition structures of the reductive elimination (TS-B) of the chalcone **1**• MeCu • BIFOP-H<sup>[a]</sup>.

| TS-B <sub>pro(R/S)</sub> <sup>[b]</sup> | Imag. freq. [cm <sup>-1</sup> ] | Hartree             | ΔG [kcal/mol] |
|-----------------------------------------|---------------------------------|---------------------|---------------|
| <b>TS-1 (R)</b>                         | <b>-377.22</b>                  | <b>-4070.170920</b> | <b>0.0</b>    |
| TS-1.1 (R)                              | -376.75                         | -4070.170295        | 0.4           |
| TS-1.2 (R)                              | -365.02                         | -4070.168599        | 1.5           |
| TS-1.3 (R)                              | -361.41                         | -4070.166708        | 2.6           |
| <b>TS-2 (S)</b>                         | <b>-368.08</b>                  | <b>-4070.165928</b> | <b>3.1</b>    |
| TS-2.1 (R)                              | -390.64                         | -4070.164430        | 4.1           |
| TS-2.2 (R)                              | -388.90                         | -4070.164400        | 4.1           |
| TS-3 (R)                                | -398.95                         | -4070.162638        | 4.9           |
| TS-3.1 (R)                              | -384.51                         | -4070.162732        | 5.1           |
| TS-4 (S)                                | -378.86                         | -4070.162638        | 5.2           |
| TS-4.1 (S)                              | -399.72                         | -4070.161513        | 5.9           |
| TS-5 (R)                                | -402.55                         | -4070.161423        | 6.0           |
| TS-6 (R)                                | -382.66                         | -4070.161142        | 6.1           |
| TS-7 (S)                                | -370.94                         | -4070.160540        | 6.6           |
| TS-7.1 (R)                              | -402.44                         | -4070.158427        | 7.8           |
| TS-7.2 (R)                              | -465.11                         | -4070.152474        | 11.6          |
| TS-8 (S)                                | -405.75                         | -4070.152390        | 11.6          |
| TS-8.1 (S)                              | -393.41                         | -4070.152372        | 11.6          |
| TS-8.2 (R)                              | -404.21                         | -4070.150382        | 12.9          |
| TS-8.3 (R)                              | -436.41                         | -4070.149969        | 13.1          |
| TS-8.4 (S)                              | -420.86                         | -4070.148164        | 14.3          |

---

[a] M06-2X-D3/def2-TZVP//B3LYP-D3(BJ)/def2-SVP, solvent = diethylether, T = 293.15 K, p = 1 bar, ZPE scaled by 0.9754 for M06-2X/def2-TZVP and 0.9912 for B3LYP/def2-SVP [1].

**Important:** The optimized structures are computed in gas phase while the single points are computed in diethylether (scrf=diethylether).

All computations are performed with GAUSSIAN 16 Revision A.03 [1a]. The transitions states are computed by using the B3LYP functional [1b-e] with the def2-SVP basis set [1f]. The energies are refined by using either the M06-2X functional [1g] with the def2-TZVP basis set [1f] or TPSS functional [1h] with def2-TZVP basis set [1f]. Grimme's dispersion (D3) with Becke-Johnson damping (BJ) [1i] is added, too. The ZPE scale factor is for B3LYP/def2-SVP 0.9912, M06-2X/def2-TZVP 0.9871 and TPSS/def2-TZVP 1.0194 [1j]. Everything is implemented in the program package of GAUSSIAN 16.

Optimized separated structure of the hydrido phosphite ligand of the reaction pathway (B3LYP-D3(BJ)/def2-SVP)

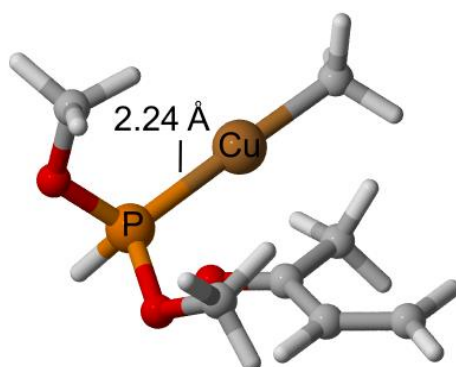

Energy: -2483.313947

Energy (M06-2X-D3/def2-TZVP//B3LYP-D3(BJ)/def2-SVP): -2483.847339

Energy (TPSS-D3(BJ)/def2-TZVP//B3LYP-D3(BJ)/def2-SVP): -2484.331000

Energy (B3LYP-D3(BJ)/def2-TZVP//B3LYP-D3(BJ)/def2-SVP): -2484.281236

0 1

|    |          |          |          |
|----|----------|----------|----------|
| O  | -2.9768  | 0.03724  | -0.84225 |
| O  | -1.39335 | -1.87388 | 0.04519  |
| P  | -1.40065 | -0.4163  | -0.72751 |
| Cu | -0.03559 | 1.08204  | 0.23715  |

|   |          |          |          |
|---|----------|----------|----------|
| C | 1.11382  | 2.33935  | 1.16408  |
| H | 0.55417  | 3.02444  | 1.82585  |
| H | 1.85119  | 1.81182  | 1.79795  |
| H | 1.67965  | 2.97165  | 0.45451  |
| C | 2.04099  | -1.35992 | 0.29229  |
| H | 1.19847  | -2.05206 | 0.20635  |
| C | 2.81393  | -1.33682 | 1.3854   |
| H | 3.65062  | -0.64154 | 1.48978  |
| H | 2.62178  | -2.00427 | 2.22964  |
| C | 3.39592  | 0.44607  | -0.97581 |
| H | 3.30795  | 1.21036  | -0.18788 |
| H | 4.34292  | -0.09455 | -0.82394 |
| H | 3.399    | 0.93951  | -1.95547 |
| C | 2.21271  | -0.48854 | -0.90162 |
| O | 1.38551  | -0.54735 | -1.80109 |
| C | -1.40815 | -1.89535 | 1.46724  |
| H | -0.93879 | -2.83334 | 1.79658  |
| H | -0.84553 | -1.04317 | 1.89009  |
| H | -2.44355 | -1.86458 | 1.84646  |
| C | -3.52693 | 0.94318  | 0.10631  |
| H | -4.24009 | 1.59722  | -0.41588 |
| H | -4.06202 | 0.39462  | 0.89958  |
| H | -2.74009 | 1.56596  | 0.56987  |
| H | -1.27042 | -0.93286 | -2.03034 |

Optimized oxidative addition transition structure of the hydrido phosphite ligand of the reaction pathway (B3LYP-D3(BJ)/def2-SVP)

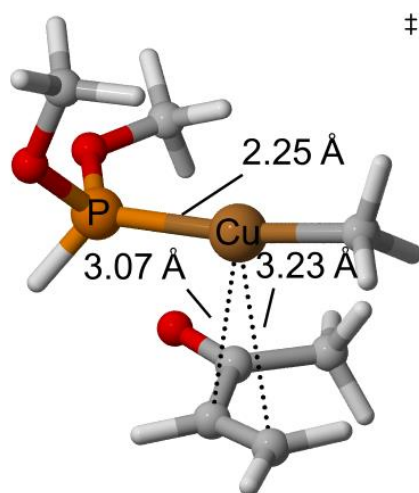

Imaginary frequency:  $-27.55 \text{ cm}^{-1}$

Energy: -2483.313194

Energy (M06-2X-D3/def2-TZVP//B3LYP-D3(BJ)/def2-SVP): -2483.847266

Energy (TPSS-D3(BJ)/def2-TZVP//B3LYP-D3(BJ)/def2-SVP): -2484.330196

Energy (B3LYP-D3(BJ)/def2-TZVP//B3LYP-D3(BJ)/def2-SVP): -2484.280794

0 1

|    |          |          |          |
|----|----------|----------|----------|
| O  | 1.74144  | -1.7219  | 0.343    |
| P  | 1.29412  | -0.48536 | -0.62861 |
| Cu | -0.03565 | 1.0496   | 0.3319   |
| C  | -0.96564 | 2.46149  | 1.29564  |
| H  | -0.32126 | 2.93746  | 2.05663  |
| H  | -1.29427 | 3.2633   | 0.60788  |
| H  | -1.87012 | 2.11042  | 1.82862  |
| C  | -2.16154 | -0.24044 | -1.4626  |
| H  | -1.62849 | -0.58928 | -2.35255 |
| C  | -2.09651 | -1.17971 | -0.3108  |
| O  | -1.30275 | -2.10849 | -0.34533 |
| C  | -2.74058 | 0.9676   | -1.43256 |
| H  | -3.24385 | 1.34893  | -0.54151 |

|   |          |          |          |
|---|----------|----------|----------|
| H | -2.69983 | 1.63637  | -2.29616 |
| C | -2.97366 | -0.93191 | 0.89347  |
| H | -2.60472 | -0.0346  | 1.41766  |
| H | -4.01941 | -0.74649 | 0.60655  |
| H | -2.91254 | -1.79459 | 1.56856  |
| O | 2.71687  | 0.14628  | -1.14504 |
| C | 3.42233  | 1.02314  | -0.27372 |
| H | 4.10721  | 1.62437  | -0.88742 |
| H | 2.7292   | 1.6963   | 0.26348  |
| H | 4.0078   | 0.45047  | 0.4647   |
| C | 1.17961  | -1.87501 | 1.64455  |
| H | 1.92514  | -2.39083 | 2.26617  |
| H | 0.94325  | -0.8964  | 2.09902  |
| H | 0.25868  | -2.47356 | 1.58774  |
| H | 1.01676  | -1.17818 | -1.83018 |

Optimized cuprate structure of the hydrido phosphite ligand of the reaction pathway (B3LYP-D3(BJ)/def2-SVP)

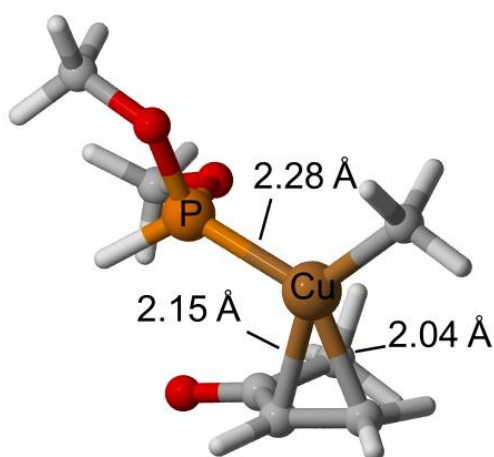

Energy: -2483.322770

Energy (M06-2X-D3/def2-TZVP//B3LYP-D3(BJ)/def2-SVP): -2483.844563

Energy (TPSS-D3(BJ)/def2-TZVP//B3LYP-D3(BJ)/def2-SVP): -2484.348023

Energy (B3LYP-D3(BJ)/def2-TZVP//B3LYP-D3(BJ)/def2-SVP): -2484.286904

0 1

|    |          |          |          |
|----|----------|----------|----------|
| O  | -1.44617 | 0.83294  | 0.94444  |
| O  | -2.39688 | -1.26266 | -0.32241 |
| P  | -1.15764 | -0.20112 | -0.29508 |
| H  | -1.51285 | 0.64644  | -1.39781 |
| Cu | 0.94704  | -1.05119 | -0.0328  |
| C  | 1.18106  | -2.73673 | 0.95047  |
| H  | 0.56293  | -3.51455 | 0.4695   |
| H  | 2.22222  | -3.09259 | 0.99719  |
| H  | 0.81201  | -2.60477 | 1.98269  |
| C  | 1.95854  | 0.5675   | -1.01245 |
| H  | 1.73608  | 0.49645  | -2.08229 |
| C  | 1.37627  | 1.75883  | -0.36666 |
| O  | 0.6054   | 2.48717  | -0.98553 |
| C  | 2.8248   | -0.34946 | -0.41274 |
| H  | 3.25089  | -0.17206 | 0.57748  |
| H  | 3.34649  | -1.09164 | -1.02125 |
| C  | 1.69169  | 2.02227  | 1.09407  |
| H  | 2.76965  | 1.95865  | 1.30403  |
| H  | 1.3175   | 3.01741  | 1.3655   |
| H  | 1.18142  | 1.27099  | 1.72055  |
| C  | -2.08359 | 2.10234  | 0.78361  |
| H  | -1.4344  | 2.77848  | 0.20731  |
| H  | -3.05962 | 2.00286  | 0.27934  |
| H  | -2.24573 | 2.51006  | 1.79119  |
| C  | -3.75025 | -0.84908 | -0.44688 |



|   |          |          |          |
|---|----------|----------|----------|
| H | -3.87521 | -0.13449 | -1.28133 |
| H | -4.35491 | -1.74405 | -0.64837 |
| H | -4.10607 | -0.37954 | 0.48504  |

Optimized reductive elimination transition structure of the hydrido phosphite ligand of the reaction pathway (B3LYP-D3(BJ)/def2-SVP)

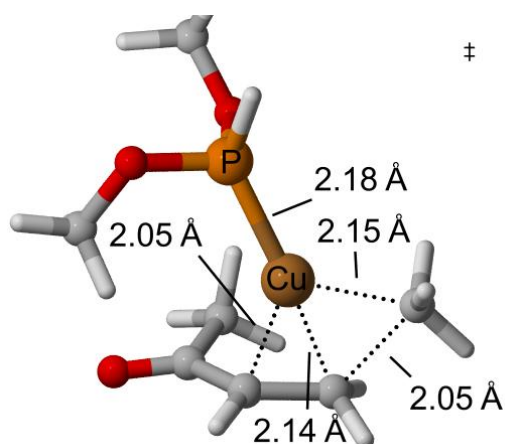

Imaginary frequency:  $-417.83 \text{ cm}^{-1}$

Energy: -2483.287612

Energy (M06-2X-D3/def2-TZVP//B3LYP-D3(BJ)/def2-SVP): -2483.823009

Energy (TPSS-D3(BJ)/def2-TZVP//B3LYP-D3(BJ)/def2-SVP): -2484.315083

Energy (B3LYP-D3(BJ)/def2-TZVP//B3LYP-D3(BJ)/def2-SVP): -2484.254244

0 1

|    |          |          |          |
|----|----------|----------|----------|
| O  | -2.21336 | 0.50099  | -1.2434  |
| O  | -1.98689 | -0.58819 | 1.12991  |
| P  | -1.51363 | -0.73144 | -0.43257 |
| Cu | 0.6692   | -0.76771 | -0.41189 |
| C  | 1.95054  | -2.40807 | 0.12531  |
| H  | 1.29479  | -2.6675  | 0.97283  |
| H  | 1.6138   | -2.93226 | -0.78714 |
| H  | 2.95981  | -2.76097 | 0.35689  |

|   |          |          |          |
|---|----------|----------|----------|
| C | 2.09974  | 0.703    | -0.43585 |
| H | 2.27966  | 1.03555  | -1.46347 |
| C | 1.48055  | 1.69622  | 0.41828  |
| O | 1.07428  | 2.78069  | -0.00939 |
| C | 2.75012  | -0.5265  | 0.01135  |
| H | 3.05737  | -0.56469 | 1.06101  |
| H | 3.542    | -0.87806 | -0.65567 |
| C | 1.25967  | 1.35864  | 1.8974   |
| H | 2.10248  | 0.82082  | 2.35819  |
| H | 1.08114  | 2.29612  | 2.44071  |
| H | 0.36106  | 0.72497  | 2.00707  |
| C | -1.55189 | 1.78062  | -1.27558 |
| H | -0.51036 | 1.68717  | -1.61421 |
| H | -2.12223 | 2.40903  | -1.97141 |
| H | -1.53595 | 2.24624  | -0.2799  |
| C | -3.36248 | -0.4173  | 1.46278  |
| H | -3.95906 | -1.28174 | 1.12058  |
| H | -3.42657 | -0.34382 | 2.55649  |
| H | -3.76952 | 0.49874  | 1.00703  |
| H | -2.42056 | -1.72195 | -0.91454 |

Optimized product structure of the hydrido phosphite ligand of the reaction pathway (B3LYP-D3(BJ)/def2-SVP)

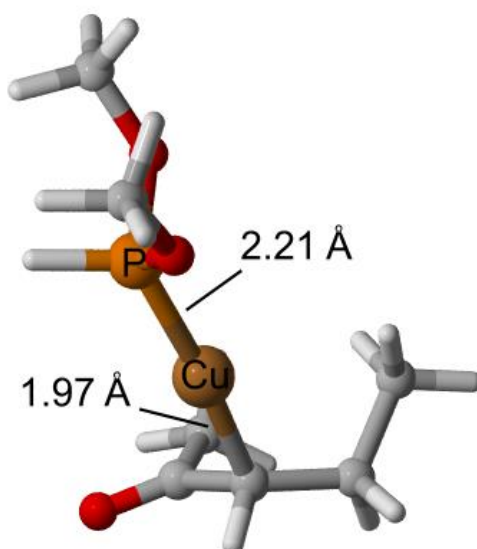

Energy: -2483.339758

Energy (M06-2X-D3/def2-TZVP//B3LYP-D3(BJ)/def2-SVP): -2483.885040

Energy (TPSS-D3(BJ)/def2-TZVP//B3LYP-D3(BJ)/def2-SVP): -2484.361946

Energy (B3LYP-D3(BJ)/def2-TZVP//B3LYP-D3(BJ)/def2-SVP): -2484.313376

0 1

|    |          |          |          |
|----|----------|----------|----------|
| O  | -2.246   | 0.78723  | 1.21591  |
| O  | -2.76591 | -1.06218 | -0.61365 |
| P  | -1.80207 | 0.19916  | -0.23892 |
| H  | -2.38063 | 1.20373  | -1.08907 |
| Cu | 0.35782  | -0.26683 | -0.3587  |
| C  | 2.35333  | -1.5423  | 1.81541  |
| H  | 2.45651  | -0.56598 | 2.31343  |
| H  | 1.27535  | -1.78197 | 1.78978  |
| H  | 2.85107  | -2.29248 | 2.45315  |
| C  | 2.29999  | -0.53442 | -0.5857  |
| H  | 2.33507  | -0.90842 | -1.62311 |
| C  | 2.93272  | -1.52793 | 0.39724  |
| H  | 2.8099   | -2.53882 | -0.02693 |

|   |          |          |          |
|---|----------|----------|----------|
| C | 2.75882  | 0.87392  | -0.62652 |
| O | 2.61674  | 1.58841  | -1.61455 |
| H | 4.0286   | -1.37616 | 0.46329  |
| C | 3.39778  | 1.4702   | 0.62902  |
| H | 4.25105  | 0.86682  | 0.97802  |
| H | 3.73253  | 2.49101  | 0.40272  |
| H | 2.66856  | 1.50265  | 1.45438  |
| C | -3.46821 | 1.46673  | 1.47281  |
| H | -3.79085 | 2.05881  | 0.59749  |
| H | -4.26469 | 0.75317  | 1.73934  |
| H | -3.3023  | 2.14633  | 2.32029  |
| C | -4.15541 | -0.95553 | -0.89529 |
| H | -4.74866 | -1.0068  | 0.0321   |
| H | -4.38771 | -0.01215 | -1.42166 |
| H | -4.43232 | -1.80067 | -1.54076 |

Optimized separated structure of the fluoro phosphite ligand of the reaction pathway (B3LYP-D3(BJ)/def2-SVP)

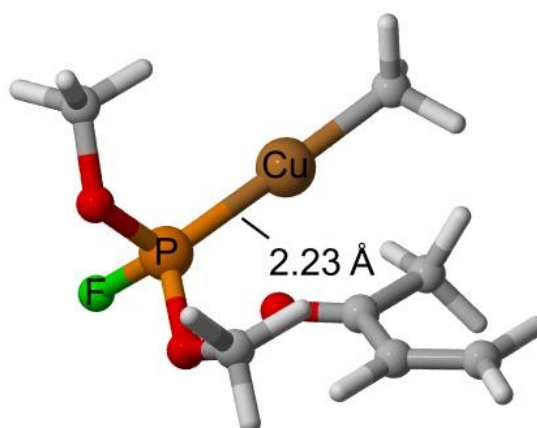

Energy: -2582.516139

Energy (M06-2X-D3/def2-TZVP//B3LYP-D3(BJ)/def2-SVP): -2583.847339

Energy (TPSS-D3(BJ)/def2-TZVP//B3LYP-D3(BJ)/def2-SVP): -2583.671423

Energy (B3LYP-D3(BJ)/def2-TZVP//B3LYP-D3(BJ)/def2-SVP): -2583.617013

0 1

|    |          |          |          |
|----|----------|----------|----------|
| O  | -2.92716 | 0.02472  | 0.08224  |
| O  | -1.30583 | -1.85271 | 0.16877  |
| P  | -1.40998 | -0.33293 | -0.39155 |
| Cu | 0.13294  | 1.1371   | 0.24862  |
| C  | 1.3286   | 2.4067   | 1.09559  |
| H  | 0.79723  | 3.14055  | 1.72692  |
| H  | 2.0585   | 1.89114  | 1.74734  |
| H  | 1.90265  | 2.98192  | 0.34555  |
| C  | 2.14877  | -1.37753 | 0.33202  |
| H  | 1.26957  | -2.02678 | 0.29157  |
| C  | 2.99846  | -1.41644 | 1.36612  |
| H  | 3.87383  | -0.76429 | 1.42214  |
| H  | 2.83751  | -2.09563 | 2.2076   |
| C  | 3.49895  | 0.38494  | -1.00307 |
| H  | 3.52451  | 1.13228  | -0.1946  |
| H  | 4.4207   | -0.21419 | -0.94491 |
| H  | 3.44867  | 0.90476  | -1.96763 |
| C  | 2.27123  | -0.47993 | -0.84867 |
| O  | 1.36393  | -0.45701 | -1.6691  |
| C  | -1.35099 | -2.07689 | 1.57716  |
| H  | -1.1153  | -3.13654 | 1.74056  |
| H  | -0.60844 | -1.45486 | 2.1067   |
| H  | -2.35501 | -1.85729 | 1.97168  |
| C  | -3.35182 | 1.38358  | 0.18759  |
| H  | -3.82539 | 1.70863  | -0.75205 |
| H  | -4.08559 | 1.44256  | 1.00294  |

|   |          |          |          |
|---|----------|----------|----------|
| H | -2.50212 | 2.05089  | 0.41636  |
| F | -1.62819 | -0.70576 | -1.92807 |

Optimized oxidative addition transition structure of the fluoro phosphite ligand of the reaction pathway (B3LYP-D3(BJ)/def2-SVP)

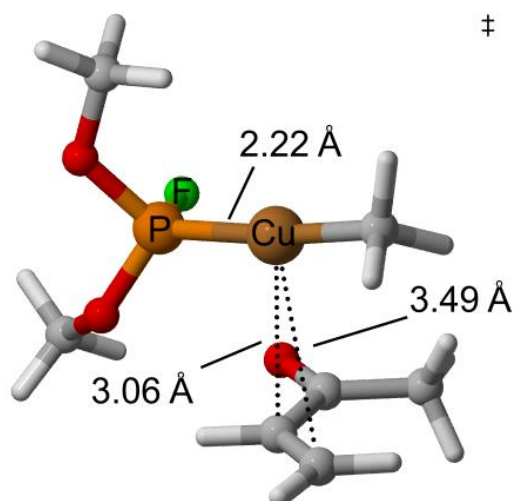

Imaginary frequency:  $-43.54 \text{ cm}^{-1}$

Energy: -2582.519812

Energy (M06-2X-D3/def2-TZVP//B3LYP-D3(BJ)/def2-SVP): -2583.156799

Energy (TPSS-D3(BJ)/def2-TZVP//B3LYP-D3(BJ)/def2-SVP): -2583.671910

Energy (B3LYP-D3(BJ)/def2-TZVP//B3LYP-D3(BJ)/def2-SVP): -2583.618313

0 1

|    |          |          |          |
|----|----------|----------|----------|
| P  | 1.33185  | -0.14825 | 0.00917  |
| Cu | -0.32836 | 1.33106  | -0.01378 |
| C  | -1.65104 | 2.74895  | 0.0287   |
| H  | -1.21656 | 3.72961  | 0.29215  |
| H  | -2.13557 | 2.86155  | -0.9588  |
| H  | -2.45473 | 2.55183  | 0.76291  |
| C  | -2.0195  | -1.01007 | -1.01093 |
| H  | -1.17993 | -1.47009 | -1.53887 |

|   |          |          |          |
|---|----------|----------|----------|
| C | -2.01302 | -1.24773 | 0.45885  |
| O | -1.0799  | -1.85012 | 0.96791  |
| C | -2.93595 | -0.28557 | -1.66676 |
| H | -3.76395 | 0.20878  | -1.1532  |
| H | -2.86946 | -0.13436 | -2.74727 |
| C | -3.1527  | -0.71542 | 1.29754  |
| H | -3.13636 | 0.38592  | 1.27267  |
| H | -4.12835 | -1.04692 | 0.91034  |
| H | -3.02317 | -1.05695 | 2.33186  |
| O | 2.81237  | 0.41514  | -0.36284 |
| C | 3.20175  | 1.71947  | 0.06868  |
| H | 3.95018  | 2.09482  | -0.64193 |
| H | 2.33854  | 2.40808  | 0.08368  |
| H | 3.64419  | 1.675    | 1.07661  |
| O | 1.26955  | -1.44055 | -0.93949 |
| C | 1.75838  | -2.73569 | -0.56881 |
| H | 2.79517  | -2.67768 | -0.20547 |
| H | 1.10493  | -3.16304 | 0.20433  |
| H | 1.72254  | -3.35265 | -1.47578 |
| F | 1.63926  | -0.80334 | 1.45341  |

Optimized cuprate structure of the fluoro phosphite ligand of the reaction pathway (B3LYP-D3(BJ)/def2-SVP)

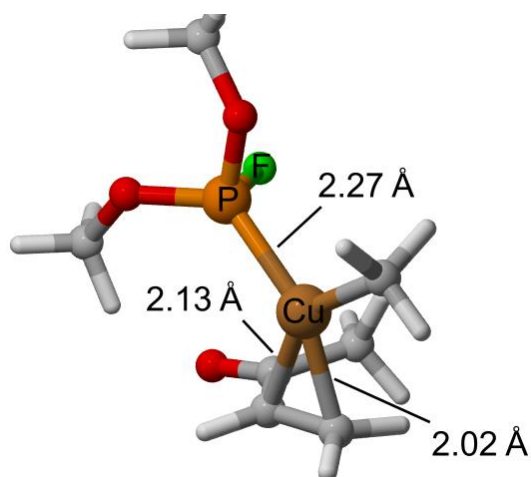

Energy: -2582.531898

Energy (M06-2X-D3/def2-TZVP//B3LYP-D3(BJ)/def2-SVP): -2583.156583

Energy (TPSS-D3(BJ)/def2-TZVP//B3LYP-D3(BJ)/def2-SVP): -2583.693446

Energy (B3LYP-D3(BJ)/def2-TZVP//B3LYP-D3(BJ)/def2-SVP): -2583.635487

0 1

|    |          |          |          |
|----|----------|----------|----------|
| O  | -2.44381 | -0.96742 | 0.25728  |
| O  | -1.90065 | 1.10577  | -0.96964 |
| P  | -1.20072 | 0.01168  | 0.00188  |
| Cu | 0.74592  | -1.10833 | -0.31409 |
| C  | 0.47937  | -3.03142 | 0.01573  |
| H  | 1.37206  | -3.64818 | -0.17118 |
| H  | 0.16661  | -3.17999 | 1.06405  |
| H  | -0.3414  | -3.38861 | -0.62991 |
| C  | 2.18331  | 0.40519  | -0.74627 |
| H  | 2.01221  | 0.78256  | -1.76001 |
| C  | 2.00714  | 1.42633  | 0.30859  |
| O  | 1.63246  | 2.55565  | 0.02409  |
| C  | 2.7401   | -0.86409 | -0.56548 |
| H  | 3.17008  | -1.17047 | 0.3912   |



|   |          |          |          |
|---|----------|----------|----------|
| H | 3.05112  | -1.45669 | -1.42908 |
| C | 2.26877  | 1.03059  | 1.75031  |
| H | 1.61558  | 0.19242  | 2.04553  |
| H | 3.31013  | 0.70029  | 1.89049  |
| H | 2.06331  | 1.89226  | 2.39697  |
| C | -1.29748 | 2.37672  | -1.25651 |
| H | -1.50034 | 3.07917  | -0.43434 |
| H | -0.20744 | 2.29828  | -1.37812 |
| H | -1.7575  | 2.74504  | -2.18255 |
| C | -3.76717 | -0.50529 | 0.55475  |
| H | -3.75077 | 0.19218  | 1.40608  |
| H | -4.20473 | -0.00572 | -0.32132 |
| H | -4.35773 | -1.3922  | 0.81656  |
| F | -1.13892 | 0.86064  | 1.3906   |

Optimized reductive elimination transition structure of the fluoro phosphite ligand of the reaction pathway (B3LYP-D3(BJ)/def2-SVP)

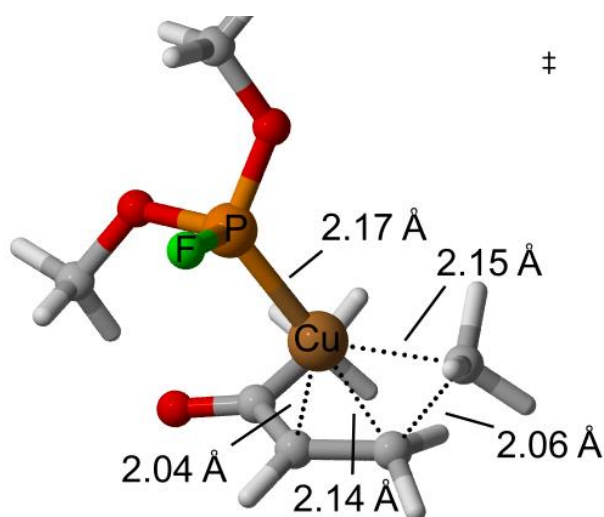

Imaginary frequency:  $-411.35 \text{ cm}^{-1}$

Energy: -2582.495134

Energy (M06-2X-D3/def2-TZVP//B3LYP-D3(BJ)/def2-SVP): -2583.135441

Energy (TPSS-D3(BJ)/def2-TZVP//B3LYP-D3(BJ)/def2-SVP): -2583.660161

Energy (B3LYP-D3(BJ)/def2-TZVP//B3LYP-D3(BJ)/def2-SVP): -2583.594440

0 1

|    |          |          |          |
|----|----------|----------|----------|
| O  | -1.78303 | 1.42699  | 0.04487  |
| O  | -2.44316 | -0.75788 | 0.99628  |
| P  | -1.48598 | -0.14727 | -0.13765 |
| Cu | 0.58775  | -0.77186 | -0.2492  |
| C  | 1.42423  | -2.70933 | 0.13601  |
| H  | 0.88711  | -2.73511 | 1.09952  |
| H  | 0.79351  | -3.14702 | -0.65679 |
| H  | 2.32132  | -3.3272  | 0.23466  |
| C  | 2.3247   | 0.21053  | -0.68798 |
| H  | 2.29028  | 0.49343  | -1.74482 |
| C  | 2.28905  | 1.31335  | 0.24779  |
| O  | 2.06075  | 2.47873  | -0.09342 |
| C  | 2.68862  | -1.15974 | -0.33745 |
| H  | 3.24394  | -1.29192 | 0.59536  |
| H  | 3.12681  | -1.73777 | -1.15586 |
| C  | 2.53539  | 1.00972  | 1.73008  |
| H  | 3.57624  | 0.68668  | 1.89952  |
| H  | 2.34872  | 1.92529  | 2.30554  |
| H  | 1.88238  | 0.20432  | 2.10841  |
| C  | -1.11469 | 2.41899  | -0.76241 |
| H  | -0.01944 | 2.36766  | -0.64918 |
| H  | -1.40265 | 2.29753  | -1.81819 |
| H  | -1.46893 | 3.3928   | -0.40224 |
| C  | -3.77459 | -0.28183 | 1.24267  |
| H  | -4.36493 | -0.29022 | 0.3139   |

|   |          |          |         |
|---|----------|----------|---------|
| H | -4.22346 | -0.96834 | 1.97152 |
| H | -3.74631 | 0.73812  | 1.65131 |
| F | -2.32361 | -0.44534 | -1.495  |

Optimized product structure of the fluoro phosphite ligand of the reaction pathway (B3LYP-D3(BJ)/def2-SVP)

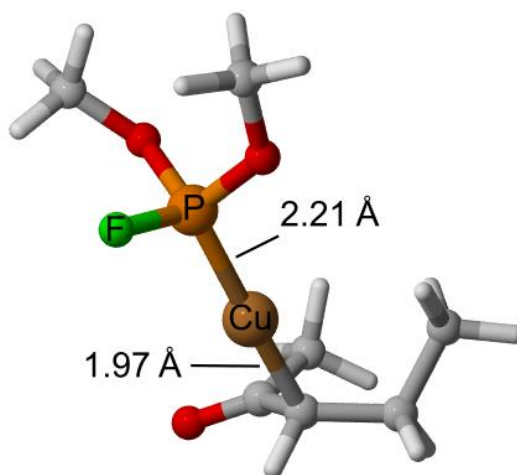

Energy: -2582.546812

Energy (M06-2X-D3/def2-TZVP//B3LYP-D3(BJ)/def2-SVP): -2583.195206

Energy (TPSS-D3(BJ)/def2-TZVP//B3LYP-D3(BJ)/def2-SVP): -2583.704234

Energy (B3LYP-D3(BJ)/def2-TZVP//B3LYP-D3(BJ)/def2-SVP): -2583.650430

0 1

|    |          |          |          |
|----|----------|----------|----------|
| O  | 2.17435  | -1.07164 | 0.89524  |
| O  | 2.30388  | 1.41492  | 0.1779   |
| P  | 1.66645  | -0.01208 | -0.21047 |
| Cu | -0.51666 | 0.07591  | -0.50919 |
| C  | -2.39246 | 2.23444  | 0.85222  |
| H  | -2.42686 | 1.64781  | 1.78317  |
| H  | -1.32736 | 2.42001  | 0.62364  |
| H  | -2.86747 | 3.2086   | 1.05819  |

|   |          |          |          |
|---|----------|----------|----------|
| C | -2.47558 | 0.14583  | -0.7041  |
| H | -2.59922 | -0.05787 | -1.78115 |
| C | -3.07257 | 1.50506  | -0.31127 |
| H | -3.0187  | 2.16009  | -1.19716 |
| C | -2.89279 | -1.08581 | 0.01032  |
| O | -2.81927 | -2.19991 | -0.49609 |
| H | -4.15406 | 1.4124   | -0.08845 |
| C | -3.3973  | -0.95897 | 1.44884  |
| H | -4.23661 | -0.24929 | 1.52514  |
| H | -3.71599 | -1.94952 | 1.79875  |
| H | -2.59726 | -0.58266 | 2.10648  |
| C | 3.38213  | -1.83954 | 0.89032  |
| H | 3.58812  | -2.23843 | -0.11293 |
| H | 4.23589  | -1.22926 | 1.22382  |
| H | 3.23339  | -2.66843 | 1.59403  |
| C | 3.67979  | 1.63261  | 0.50294  |
| H | 3.90312  | 1.23583  | 1.50557  |
| H | 4.33779  | 1.16173  | -0.24356 |
| H | 3.84435  | 2.71752  | 0.49864  |
| F | 2.61424  | -0.43971 | -1.45807 |

Optimized separated structure of the methylphosphite ligand of the reaction pathway  
(B3LYP-D3(BJ)/def2-SVP)

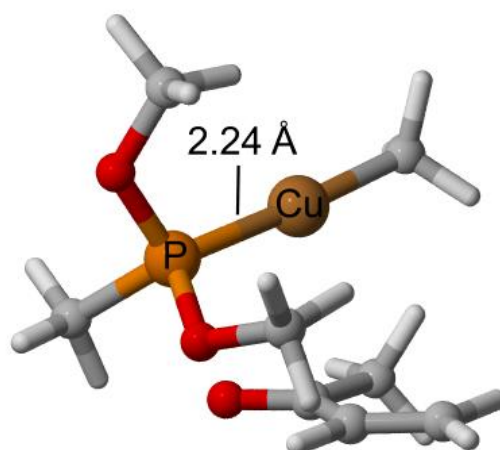

Energy: -2522.624479

Energy (M06-2X-D3/def2-TZVP//B3LYP-D3(BJ)/def2-SVP): -2523.173884

Energy (TPSS-D3(BJ)/def2-TZVP//B3LYP-D3(BJ)/def2-SVP): -2523.686367

Energy (B3LYP-D3(BJ)/def2-TZVP//B3LYP-D3(BJ)/def2-SVP): -2523.634713

0 1

|    |          |          |          |
|----|----------|----------|----------|
| O  | -2.94352 | 0.05989  | -0.52854 |
| O  | -1.40759 | -1.55596 | 0.8551   |
| P  | -1.39073 | -0.47282 | -0.39482 |
| Cu | 0.09588  | 1.18402  | -0.1172  |
| C  | 1.2819   | 2.69676  | 0.15963  |
| H  | 0.72871  | 3.62515  | 0.39167  |
| H  | 1.97673  | 2.52348  | 1.00322  |
| H  | 1.89716  | 2.91149  | -0.73381 |
| C  | 1.96275  | -1.17749 | 0.81662  |
| H  | 1.14195  | -1.89938 | 0.85172  |
| C  | 2.4787   | -0.66435 | 1.94078  |
| H  | 3.28316  | 0.07494  | 1.92585  |
| H  | 2.09363  | -0.95148 | 2.92286  |
| C  | 3.60303  | 0.06294  | -0.75562 |

|   |          |          |          |
|---|----------|----------|----------|
| H | 3.37499  | 1.06444  | -0.36066 |
| H | 4.48366  | -0.32419 | -0.21945 |
| H | 3.82298  | 0.13883  | -1.8276  |
| C | 2.41045  | -0.84422 | -0.56497 |
| O | 1.80984  | -1.31813 | -1.51655 |
| C | -1.34983 | -1.06988 | 2.1889   |
| H | -0.93434 | -1.86695 | 2.82216  |
| H | -0.70426 | -0.17672 | 2.2653   |
| H | -2.35833 | -0.81509 | 2.55631  |
| C | -3.34382 | 1.28208  | 0.07871  |
| H | -4.08553 | 1.76329  | -0.5752  |
| H | -3.80638 | 1.09367  | 1.06222  |
| H | -2.48541 | 1.96482  | 0.21154  |
| C | -1.3675  | -1.65616 | -1.75831 |
| H | -0.37081 | -2.11582 | -1.79208 |
| H | -2.15493 | -2.40702 | -1.6008  |
| H | -1.5465  | -1.11232 | -2.69682 |

Optimized oxidative addition transition structure of the methylphosphite ligand of the reaction pathway (B3LYP-D3(BJ)/def2-SVP)

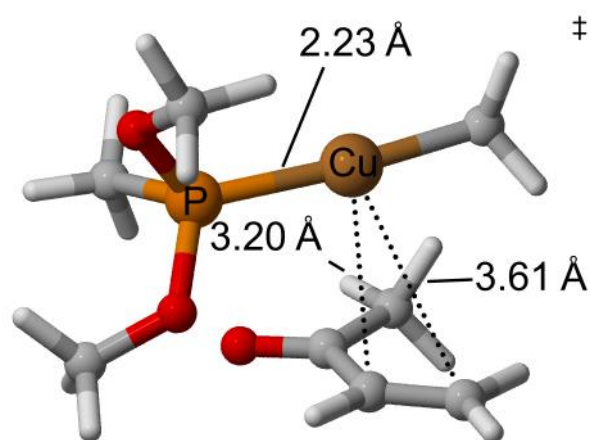

Imaginary frequency: -35.29 cm<sup>-1</sup>

Energy: -2522.623812

Energy (M06-2X-D3/def2-TZVP//B3LYP-D3(BJ)/def2-SVP): -2523.173483

Energy (TPSS-D3(BJ)/def2-TZVP//B3LYP-D3(BJ)/def2-SVP): -2523.684588

Energy (B3LYP-D3(BJ)/def2-TZVP//B3LYP-D3(BJ)/def2-SVP): -2523.633900

0 1

|    |          |          |          |
|----|----------|----------|----------|
| P  | -1.33538 | -0.08284 | -0.28105 |
| Cu | 0.35171  | 1.36966  | -0.14903 |
| C  | 1.77026  | 2.69656  | -0.17894 |
| H  | 1.37651  | 3.72549  | -0.08845 |
| H  | 2.48093  | 2.55023  | 0.6556   |
| H  | 2.3585   | 2.66985  | -1.11565 |
| C  | 1.95051  | -1.05581 | 1.18786  |
| H  | 1.07702  | -1.48347 | 1.68569  |
| C  | 2.02444  | -1.36611 | -0.26384 |
| O  | 1.16709  | -2.07576 | -0.77123 |
| C  | 2.83566  | -0.30594 | 1.85718  |
| H  | 3.69537  | 0.15767  | 1.36787  |
| H  | 2.71373  | -0.10596 | 2.92488  |
| C  | 3.14605  | -0.7774  | -1.08867 |
| H  | 3.0488   | 0.32003  | -1.10105 |
| H  | 4.13042  | -1.02362 | -0.66147 |
| H  | 3.07879  | -1.16434 | -2.11305 |
| O  | -2.85203 | 0.5635   | -0.18374 |
| C  | -3.09519 | 1.57329  | 0.78885  |
| H  | -3.17179 | 1.13976  | 1.80029  |
| H  | -2.2903  | 2.32956  | 0.78677  |
| H  | -4.0473  | 2.05857  | 0.53283  |

|   |          |          |          |
|---|----------|----------|----------|
| O | -1.29252 | -1.20094 | 0.92072  |
| C | -1.97501 | -2.44715 | 0.8607   |
| H | -3.02393 | -2.32135 | 0.54474  |
| H | -1.45439 | -3.13454 | 0.17555  |
| H | -1.96121 | -2.87415 | 1.87337  |
| C | -1.57528 | -1.00239 | -1.83173 |
| H | -0.70364 | -1.65124 | -1.99116 |
| H | -2.50444 | -1.58924 | -1.80821 |
| H | -1.64089 | -0.2655  | -2.64555 |

Optimized cuprate structure of the methylphosphite ligand of the reaction pathway (B3LYP-D3(BJ)/def2-SVP)

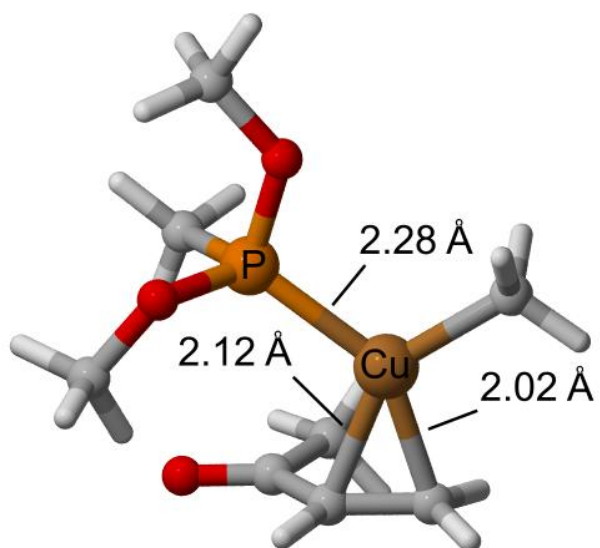

Energy: -2522.628583

Energy (M06-2X-D3/def2-TZVP//B3LYP-D3(BJ)/def2-SVP):

Energy (TPSS-D3(BJ)/def2-TZVP//B3LYP-D3(BJ)/def2-SVP):

Energy (B3LYP-D3(BJ)/def2-TZVP//B3LYP-D3(BJ)/def2-SVP):

0 1

|   |         |         |         |
|---|---------|---------|---------|
| O | 2.42419 | 1.00057 | 0.35207 |
|---|---------|---------|---------|



|    |          |          |          |
|----|----------|----------|----------|
| O  | 1.85654  | -0.93091 | -1.13968 |
| P  | 1.21209  | -0.05581 | 0.10127  |
| Cu | -0.73236 | 1.06922  | -0.25986 |
| C  | -0.50921 | 2.99812  | 0.07509  |
| H  | -1.37609 | 3.61805  | -0.20029 |
| H  | -0.29624 | 3.14783  | 1.14814  |
| H  | 0.37381  | 3.33838  | -0.49177 |
| C  | -2.12767 | -0.42028 | -0.8235  |
| H  | -1.82569 | -0.83259 | -1.79133 |
| C  | -2.04809 | -1.36921 | 0.29515  |
| O  | -1.52926 | -2.47592 | 0.16204  |
| C  | -2.68203 | 0.86715  | -0.75337 |
| H  | -3.23846 | 1.20437  | 0.12401  |
| H  | -2.87872 | 1.42698  | -1.67069 |
| C  | -2.57882 | -0.93178 | 1.65049  |
| H  | -2.03585 | -0.04143 | 2.01221  |
| H  | -3.64302 | -0.6548  | 1.59168  |
| H  | -2.45108 | -1.75307 | 2.36663  |
| C  | 1.30957  | -2.18885 | -1.53681 |
| H  | 1.8392   | -3.01104 | -1.02632 |
| H  | 0.2363   | -2.27549 | -1.30484 |
| H  | 1.46229  | -2.289   | -2.62094 |
| C  | 3.77927  | 0.60296  | 0.53513  |
| H  | 3.93414  | 0.16073  | 1.53405  |
| H  | 4.08712  | -0.11895 | -0.2365  |
| H  | 4.39337  | 1.50983  | 0.45184  |
| C  | 1.29022  | -1.22229 | 1.51331  |
| H  | 1.06654  | -0.67053 | 2.43931  |
| H  | 0.51988  | -1.99619 | 1.36887  |

H 2.27862 -1.69836 1.59427

Optimized reductive elimination transition structure of the methylphosphite ligand of the reaction pathway (B3LYP-D3(BJ)/def2-SVP)

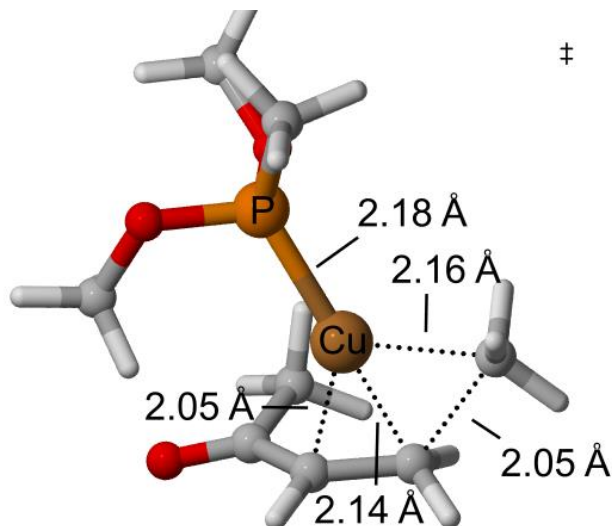

Imaginary frequency:  $-416.02 \text{ cm}^{-1}$

Energy: -2522.594701

Energy (M06-2X-D3/def2-TZVP//B3LYP-D3(BJ)/def2-SVP): -2523.147852

Energy (TPSS-D3(BJ)/def2-TZVP//B3LYP-D3(BJ)/def2-SVP): -2523.668818

Energy (B3LYP-D3(BJ)/def2-TZVP//B3LYP-D3(BJ)/def2-SVP): -2523.605425

0 1

|    |          |          |          |
|----|----------|----------|----------|
| O  | -1.96975 | 0.93451  | -1.11677 |
| O  | -1.81111 | 0.02995  | 1.32533  |
| P  | -1.48403 | -0.35948 | -0.23877 |
| Cu | 0.65109  | -0.81555 | -0.30498 |
| C  | 1.58408  | -2.62573 | 0.40055  |
| H  | 0.96369  | -2.61753 | 1.31176  |
| H  | 1.06059  | -3.16883 | -0.40678 |
| H  | 2.50728  | -3.16984 | 0.62171  |
| C  | 2.36565  | 0.27928  | -0.58965 |

|   |          |          |          |
|---|----------|----------|----------|
| H | 2.53604  | 0.44074  | -1.65906 |
| C | 2.03956  | 1.47566  | 0.15794  |
| O | 1.84366  | 2.56873  | -0.38231 |
| C | 2.76163  | -1.004   | -0.01459 |
| H | 3.13594  | -0.98473 | 1.01371  |
| H | 3.40227  | -1.6037  | -0.66709 |
| C | 1.86589  | 1.36368  | 1.67771  |
| H | 2.63845  | 0.74677  | 2.16259  |
| H | 1.88603  | 2.37667  | 2.10106  |
| H | 0.88521  | 0.91219  | 1.91391  |
| C | -1.08265 | 2.0596   | -1.2534  |
| H | -0.92095 | 2.55855  | -0.28668 |
| H | -0.09919 | 1.75619  | -1.6389  |
| H | -1.56487 | 2.75574  | -1.95174 |
| C | -3.06385 | 0.57618  | 1.72944  |
| H | -3.82819 | -0.21356 | 1.82453  |
| H | -2.91286 | 1.04425  | 2.71159  |
| H | -3.41597 | 1.33725  | 1.01522  |
| C | -2.82545 | -1.49272 | -0.73015 |
| H | -2.81196 | -2.37519 | -0.07339 |
| H | -3.80417 | -0.99386 | -0.67634 |
| H | -2.64999 | -1.81529 | -1.76715 |

Optimized product structure of the methylphosphite ligand of the reaction pathway (B3LYP-D3(BJ)/def2-SVP)

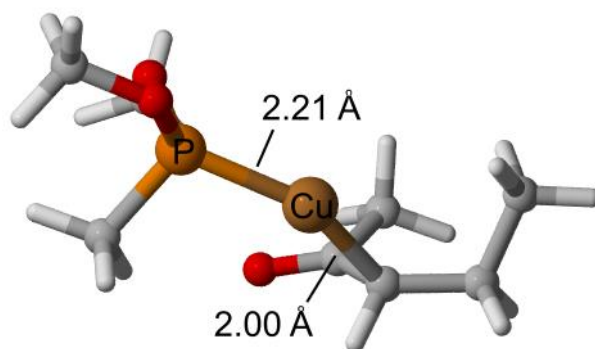

Energy: -2522.652875

Energy (M06-2X-D3/def2-TZVP//B3LYP-D3(BJ)/def2-SVP): -2523.206372

Energy (TPSS-D3(BJ)/def2-TZVP//B3LYP-D3(BJ)/def2-SVP): -2523.710646

Energy (B3LYP-D3(BJ)/def2-TZVP//B3LYP-D3(BJ)/def2-SVP): -2523.658571

0 1

|    |          |          |          |
|----|----------|----------|----------|
| O  | 2.08519  | -0.94768 | 1.03714  |
| O  | 2.82259  | 1.3456   | 0.32118  |
| P  | 1.69176  | 0.23396  | -0.0367  |
| Cu | -0.44546 | 0.76652  | -0.15002 |
| C  | -3.46302 | 1.5437   | 1.1499   |
| H  | -3.33538 | 0.71576  | 1.86497  |
| H  | -2.60121 | 2.22075  | 1.27885  |
| H  | -4.37662 | 2.09098  | 1.43708  |
| C  | -2.28983 | 0.30062  | -0.78244 |
| H  | -2.05937 | 0.46771  | -1.84803 |
| C  | -3.52867 | 1.04169  | -0.29555 |
| H  | -3.68007 | 1.91261  | -0.95471 |
| C  | -2.02893 | -1.09625 | -0.45298 |
| O  | -1.10877 | -1.74987 | -0.98913 |
| H  | -4.43999 | 0.42333  | -0.42025 |
| C  | -2.8338  | -1.77838 | 0.64762  |

|   |          |          |          |
|---|----------|----------|----------|
| H | -3.89291 | -1.48194 | 0.65426  |
| H | -2.74637 | -2.86576 | 0.51977  |
| H | -2.41143 | -1.51393 | 1.63119  |
| C | 1.47969  | -2.24251 | 0.96141  |
| H | 0.48835  | -2.2142  | 0.47722  |
| H | 2.127    | -2.92746 | 0.38862  |
| H | 1.38207  | -2.6215  | 1.98859  |
| C | 4.21468  | 1.03676  | 0.36888  |
| H | 4.40123  | 0.16336  | 1.01158  |
| H | 4.61382  | 0.84086  | -0.64066 |
| H | 4.72347  | 1.91546  | 0.78733  |
| C | 2.16308  | -0.49493 | -1.64672 |
| H | 1.3552   | -1.19561 | -1.91291 |
| H | 2.19308  | 0.30152  | -2.40628 |
| H | 3.12963  | -1.01917 | -1.60971 |

Optimized separated structure of the phosphite ligand of the reaction pathway (B3LYP-D3(BJ)/def2-SVP)

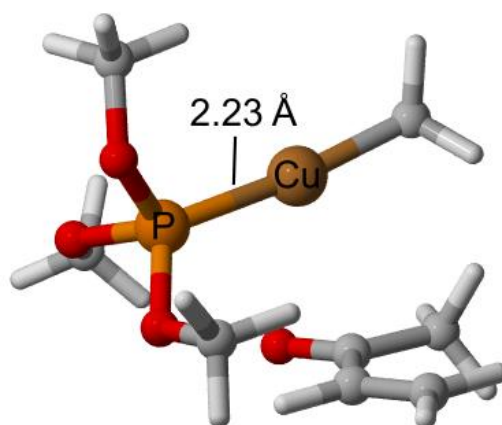

Energy: -2597.792775

Energy (M06-2X-D3/def2-TZVP//B3LYP-D3(BJ)/def2-SVP): -2598.417123

Energy (TPSS-D3(BJ)/def2-TZVP//B3LYP-D3(BJ)/def2-SVP): -2598.962211

Energy (B3LYP-D3(BJ)/def2-TZVP//B3LYP-D3(BJ)/def2-SVP): -2598.901964

0 1

|    |          |          |          |
|----|----------|----------|----------|
| O  | -2.87882 | 0.02827  | 0.5724   |
| O  | -1.32519 | -1.86651 | 0.24     |
| P  | -1.45241 | -0.28889 | -0.15772 |
| Cu | 0.18661  | 1.1078   | 0.42925  |
| C  | 1.43281  | 2.4449   | 1.0814   |
| H  | 0.91046  | 3.30332  | 1.54141  |
| H  | 2.10623  | 2.03182  | 1.85602  |
| H  | 2.0678   | 2.85405  | 0.27459  |
| C  | 2.05335  | -1.38812 | 0.29937  |
| H  | 1.19907  | -1.98499 | -0.03251 |
| C  | 2.52951  | -1.49471 | 1.5468   |
| H  | 3.37169  | -0.89469 | 1.90022  |
| H  | 2.07705  | -2.17877 | 2.26957  |
| C  | 3.84715  | 0.31655  | -0.46214 |
| H  | 3.64193  | 1.03651  | 0.34405  |
| H  | 4.67522  | -0.33387 | -0.13939 |
| H  | 4.13505  | 0.86366  | -1.36817 |
| C  | 2.60625  | -0.49283 | -0.75551 |
| O  | 2.0561   | -0.44316 | -1.84398 |
| C  | -1.22315 | -2.22276 | 1.61607  |
| H  | -0.90015 | -3.27184 | 1.65772  |
| H  | -0.48105 | -1.59607 | 2.14097  |
| H  | -2.19839 | -2.11635 | 2.11534  |
| C  | -3.37255 | 1.36414  | 0.57165  |
| H  | -3.8277  | 1.60867  | -0.40202 |
| H  | -4.13725 | 1.43485  | 1.35687  |

|   |          |          |          |
|---|----------|----------|----------|
| H | -2.56724 | 2.08938  | 0.78547  |
| O | -1.90218 | -0.41643 | -1.7055  |
| C | -1.01877 | -0.05447 | -2.77877 |
| H | -1.42116 | -0.52518 | -3.68545 |
| H | -1.01048 | 1.03912  | -2.91473 |
| H | 0.00638  | -0.40604 | -2.59879 |

Optimized oxidative addition transition structure of the phosphite ligand of the reaction pathway (B3LYP-D3(BJ)/def2-SVP)

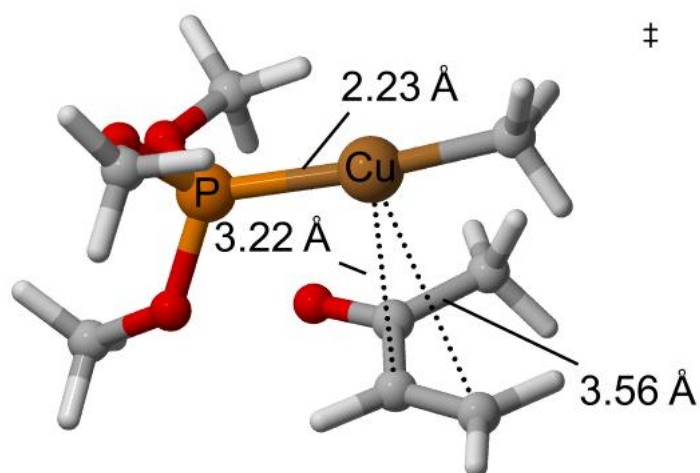

Imaginary frequency:  $-38.09 \text{ cm}^{-1}$

Energy: -2597.795967

Energy (M06-2X-D3/def2-TZVP//B3LYP-D3(BJ)/def2-SVP): -2598.419116

Energy (TPSS-D3(BJ)/def2-TZVP//B3LYP-D3(BJ)/def2-SVP): -2598.962248

Energy (B3LYP-D3(BJ)/def2-TZVP//B3LYP-D3(BJ)/def2-SVP): -2598.902589

0 1

|    |          |         |         |
|----|----------|---------|---------|
| P  | 1.30977  | 0.01745 | 0.10198 |
| Cu | -0.43203 | 1.40314 | 0.20301 |
| C  | -1.89581 | 2.65496 | 0.45178 |
| H  | -1.54597 | 3.70332 | 0.43391 |

|   |          |          |          |
|---|----------|----------|----------|
| H | -2.66066 | 2.55887  | -0.34087 |
| H | -2.41194 | 2.5151   | 1.42026  |
| C | -1.91924 | -0.92605 | -1.45707 |
| H | -1.04912 | -1.30667 | -1.99667 |
| C | -2.01299 | -1.40648 | -0.05336 |
| O | -1.15527 | -2.16041 | 0.38335  |
| C | -2.77856 | -0.07661 | -2.035   |
| H | -3.63313 | 0.34334  | -1.49956 |
| H | -2.63976 | 0.25135  | -3.06852 |
| C | -3.15423 | -0.92781 | 0.81546  |
| H | -3.05467 | 0.1576   | 0.97805  |
| H | -4.12857 | -1.10703 | 0.33569  |
| H | -3.11514 | -1.44867 | 1.78027  |
| O | 2.80494  | 0.68296  | -0.00407 |
| C | 3.04571  | 1.61144  | -1.05476 |
| H | 3.10132  | 1.1014   | -2.03109 |
| H | 2.25417  | 2.38105  | -1.10069 |
| H | 4.00658  | 2.10126  | -0.84699 |
| O | 1.2892   | -1.02087 | -1.15096 |
| C | 1.92778  | -2.29928 | -1.10167 |
| H | 2.94097  | -2.22417 | -0.67797 |
| H | 1.31954  | -2.98815 | -0.49835 |
| H | 1.98948  | -2.66535 | -2.13561 |
| O | 1.60779  | -0.91588 | 1.39033  |
| C | 0.72484  | -0.97271 | 2.51295  |
| H | 0.07962  | -1.85708 | 2.42969  |
| H | 1.34429  | -1.02597 | 3.41907  |
| H | 0.08701  | -0.07403 | 2.56334  |



Optimized cuprate structure of the phosphite ligand of the reaction pathway (B3LYP-D3(BJ)/def2-SVP)

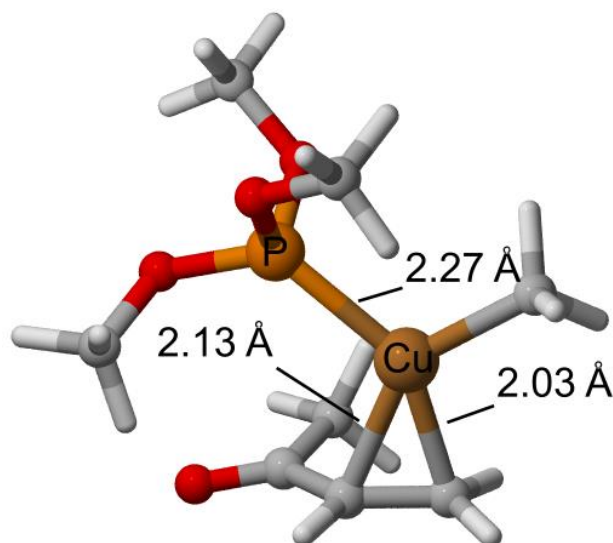

Energy: -2597.806321

Energy (M06-2X-D3/def2-TZVP//B3LYP-D3(BJ)/def2-SVP): -2598.417429

Energy (TPSS-D3(BJ)/def2-TZVP//B3LYP-D3(BJ)/def2-SVP): -2598.983828

Energy (B3LYP-D3(BJ)/def2-TZVP//B3LYP-D3(BJ)/def2-SVP): -2598.910221

0 1

|    |          |          |          |
|----|----------|----------|----------|
| O  | 1.15914  | 1.82318  | 0.34571  |
| P  | 1.09098  | 0.23353  | 0.01114  |
| Cu | -0.71694 | -1.14057 | 0.08651  |
| C  | -0.2581  | -2.96368 | -0.53168 |
| H  | 0.64765  | -2.95415 | -1.1616  |
| H  | -0.05998 | -3.61367 | 0.34022  |
| H  | -1.07235 | -3.42923 | -1.11056 |
| C  | -2.34373 | 0.0574   | 0.76849  |
| H  | -2.23018 | 0.25228  | 1.84003  |
| C  | -2.28825 | 1.27702  | -0.06498 |
| O  | -2.10712 | 2.37257  | 0.44623  |

|   |          |          |          |
|---|----------|----------|----------|
| C | -2.73183 | -1.21159 | 0.33404  |
| H | -3.11019 | -1.37931 | -0.67731 |
| H | -2.97146 | -1.993   | 1.05912  |
| C | -2.42972 | 1.13178  | -1.57113 |
| H | -3.38958 | 0.66345  | -1.84042 |
| H | -2.36365 | 2.12609  | -2.02979 |
| H | -1.62811 | 0.4906   | -1.97663 |
| C | 0.83471  | 2.32776  | 1.64328  |
| H | -0.2456  | 2.23973  | 1.83177  |
| H | 1.41859  | 1.80788  | 2.41965  |
| H | 1.10572  | 3.3918   | 1.64301  |
| C | 2.70483  | 1.06706  | -1.94993 |
| H | 3.56207  | 0.93333  | -1.27199 |
| H | 2.97534  | 0.7273   | -2.95838 |
| H | 2.42639  | 2.13066  | -1.9743  |
| O | 2.3963   | -0.24133 | 0.89051  |
| C | 2.65125  | -1.62748 | 1.11016  |
| H | 3.01016  | -2.1139  | 0.18893  |
| H | 3.42882  | -1.69506 | 1.88312  |
| H | 1.74647  | -2.1554  | 1.45075  |
| O | 1.59435  | 0.26989  | -1.5276  |

Optimized reductive elimination transition structure of the phosphite ligand of the reaction pathway (B3LYP-D3(BJ)/def2-SVP)

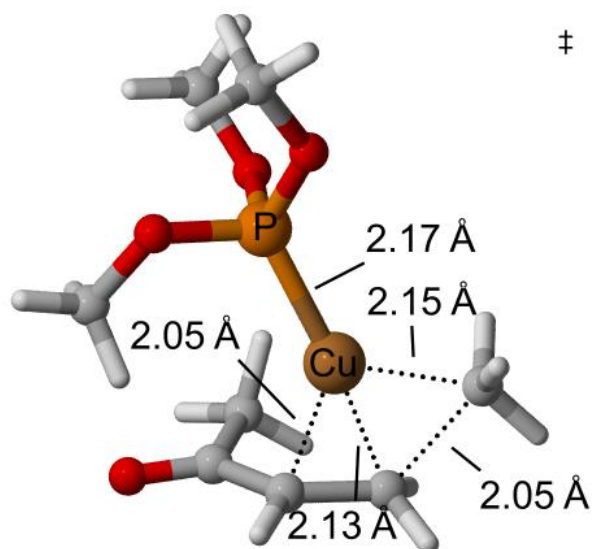

Imaginary frequency:  $-410.70 \text{ cm}^{-1}$

Energy:  $-2597.767682$

Energy (M06-2X-D3/def2-TZVP//B3LYP-D3(BJ)/def2-SVP):  $-2598.393127$

Energy (TPSS-D3(BJ)/def2-TZVP//B3LYP-D3(BJ)/def2-SVP):  $-2598.946784$

Energy (B3LYP-D3(BJ)/def2-TZVP//B3LYP-D3(BJ)/def2-SVP):  $-2598.874274$

0 1

|    |          |          |          |
|----|----------|----------|----------|
| O  | -1.7728  | 1.01461  | -0.98374 |
| O  | -1.45938 | 0.34811  | 1.47795  |
| P  | -1.27539 | -0.22418 | -0.04112 |
| Cu | 0.79311  | -0.86381 | -0.23291 |
| C  | 1.68185  | -2.67484 | 0.49737  |
| H  | 1.15782  | -2.57286 | 1.46174  |
| H  | 1.0487   | -3.22974 | -0.21783 |
| H  | 2.59123  | -3.26004 | 0.66205  |
| C  | 2.52112  | 0.11329  | -0.74907 |
| H  | 2.58655  | 0.19983  | -1.83858 |
| C  | 2.34526  | 1.37006  | -0.05171 |
| O  | 2.1486   | 2.43848  | -0.63958 |

|   |          |          |          |
|---|----------|----------|----------|
| C | 2.90328  | -1.15665 | -0.13424 |
| H | 3.38095  | -1.09999 | 0.84877  |
| H | 3.43956  | -1.83189 | -0.80663 |
| C | 2.3422   | 1.36077  | 1.48153  |
| H | 3.14859  | 0.74884  | 1.91498  |
| H | 2.43978  | 2.39699  | 1.83122  |
| H | 1.38362  | 0.95957  | 1.85733  |
| C | -0.87616 | 2.1097   | -1.24406 |
| H | 0.08578  | 1.76199  | -1.64612 |
| H | -1.37858 | 2.75974  | -1.97169 |
| H | -0.66713 | 2.67526  | -0.32387 |
| C | -2.63155 | 1.01693  | 1.93822  |
| H | -3.40847 | 0.28495  | 2.21279  |
| H | -2.35246 | 1.59415  | 2.82998  |
| H | -3.02646 | 1.70162  | 1.17131  |
| O | -2.50632 | -1.2479  | -0.30608 |
| C | -3.8081  | -0.906   | -0.78456 |
| H | -4.31192 | -1.85045 | -1.03051 |
| H | -4.39166 | -0.37862 | -0.01311 |
| H | -3.74336 | -0.27221 | -1.68004 |

Optimized product structure of the phosphite ligand of the reaction pathway (B3LYP-D3(BJ)/def2-SVP)

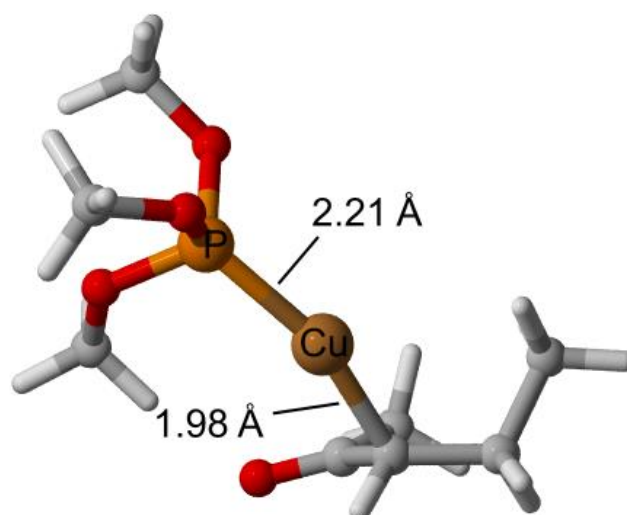

Energy: -2597.830158

Energy (M06-2X-D3/def2-TZVP//B3LYP-D3(BJ)/def2-SVP): -2598.457656

Energy (TPSS-D3(BJ)/def2-TZVP//B3LYP-D3(BJ)/def2-SVP): -2598.995989

Energy (B3LYP-D3(BJ)/def2-TZVP//B3LYP-D3(BJ)/def2-SVP): -2598.935123

0 1

|    |          |          |          |
|----|----------|----------|----------|
| O  | -1.98777 | -0.28465 | 1.60749  |
| O  | -2.64703 | -1.20853 | -0.71418 |
| P  | -1.57725 | -0.24534 | 0.03352  |
| Cu | 0.58848  | -0.5102  | -0.3148  |
| C  | 3.25211  | -2.09118 | 0.74226  |
| H  | 3.25719  | -1.48158 | 1.6592   |
| H  | 2.26443  | -2.5814  | 0.68301  |
| H  | 4.01551  | -2.87798 | 0.86458  |
| C  | 2.47755  | -0.14219 | -0.78357 |
| H  | 2.33131  | 0.04061  | -1.86199 |
| C  | 3.50192  | -1.24465 | -0.50963 |
| H  | 3.50489  | -1.92087 | -1.38096 |
| C  | 2.57164  | 1.16972  | -0.12383 |

|   |          |          |          |
|---|----------|----------|----------|
| O | 1.95867  | 2.16454  | -0.52931 |
| H | 4.52935  | -0.83221 | -0.4624  |
| C | 3.41788  | 1.30604  | 1.13884  |
| H | 4.43802  | 0.91701  | 0.99383  |
| H | 3.45751  | 2.36531  | 1.42429  |
| H | 2.96825  | 0.72995  | 1.96336  |
| C | -3.31473 | -0.03515 | 2.06848  |
| H | -3.73378 | 0.86843  | 1.59767  |
| H | -3.96564 | -0.89806 | 1.85397  |
| H | -3.26149 | 0.11327  | 3.1552   |
| C | -3.86407 | -0.80418 | -1.34236 |
| H | -4.63289 | -0.54999 | -0.59521 |
| H | -3.70079 | 0.06474  | -1.99517 |
| H | -4.2105  | -1.65927 | -1.93812 |
| C | -1.25351 | 2.36412  | -0.39166 |
| H | -0.22159 | 2.14864  | -0.71793 |
| H | -1.69328 | 3.13393  | -1.03879 |
| H | -1.23032 | 2.73143  | 0.64648  |
| O | -2.10587 | 1.20723  | -0.49099 |

Optimized separated structure of the phosphoramidite ligand of the reaction pathway  
(B3LYP-D3(BJ)/def2-SVP)

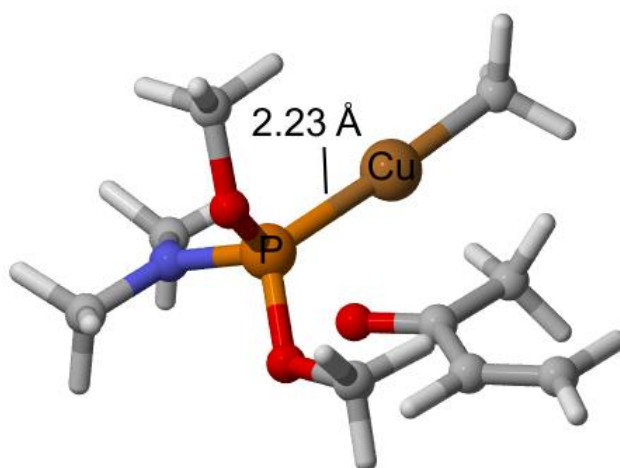

Energy: -2617.230859

Energy (M06-2X-D3/def2-TZVP//B3LYP-D3(BJ)/def2-SVP): -2617.839795

Energy (TPSS-D3(BJ)/def2-TZVP//B3LYP-D3(BJ)/def2-SVP): -2618.411076

Energy (B3LYP-D3(BJ)/def2-TZVP//B3LYP-D3(BJ)/def2-SVP): -2618.347803

0 1

|    |          |          |          |
|----|----------|----------|----------|
| O  | -2.53605 | 0.98723  | 0.55196  |
| O  | -1.17653 | -0.74276 | 1.63223  |
| P  | -1.24412 | 0.01867  | 0.17314  |
| Cu | 0.54119  | 1.16063  | -0.52635 |
| C  | 1.98823  | 2.32516  | -1.09135 |
| H  | 1.63599  | 3.34812  | -1.31723 |
| H  | 2.75947  | 2.42216  | -0.30389 |
| H  | 2.49277  | 1.95454  | -2.00265 |
| C  | 2.16326  | -0.88962 | 1.26207  |
| H  | 1.23107  | -1.32891 | 1.62711  |
| C  | 2.93602  | -0.13246 | 2.05116  |
| H  | 3.85841  | 0.3295   | 1.69018  |
| H  | 2.65885  | 0.07072  | 3.08913  |
| C  | 3.7522   | -0.77522 | -0.78011 |

|   |          |          |          |
|---|----------|----------|----------|
| H | 3.79962  | 0.32376  | -0.80287 |
| H | 4.61071  | -1.14344 | -0.19659 |
| H | 3.80735  | -1.15882 | -1.80638 |
| C | 2.44762  | -1.22059 | -0.16193 |
| O | 1.62268  | -1.85941 | -0.79568 |
| C | -0.96708 | 0.03294  | 2.80696  |
| H | -0.76141 | -0.66766 | 3.62837  |
| H | -0.10344 | 0.71183  | 2.6907   |
| H | -1.85985 | 0.63103  | 3.04509  |
| C | -2.93624 | 1.95796  | -0.4037  |
| H | -3.40836 | 1.48217  | -1.2809  |
| H | -3.66647 | 2.62065  | 0.08119  |
| H | -2.07738 | 2.56022  | -0.75041 |
| N | -1.88885 | -1.15014 | -0.81739 |
| C | -3.05988 | -1.91343 | -0.41736 |
| H | -2.78768 | -2.93968 | -0.11154 |
| H | -3.55955 | -1.41855 | 0.42574  |
| H | -3.77473 | -1.97981 | -1.25593 |
| C | -1.16492 | -1.63541 | -1.982   |
| H | -0.29406 | -0.99624 | -2.17737 |
| H | -0.78434 | -2.65835 | -1.82542 |
| H | -1.8238  | -1.6268  | -2.86802 |

Optimized oxidative addition transition structure of the phosphoramidite ligand of the reaction pathway (B3LYP-D3(BJ)/def2-SVP)



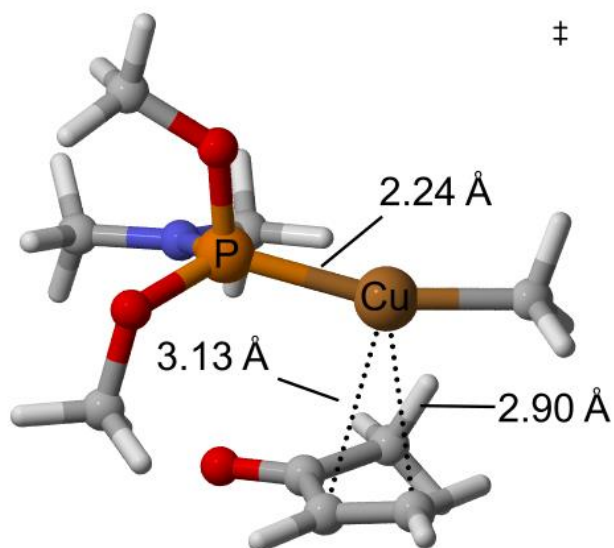

Imaginary frequency:  $-47.62 \text{ cm}^{-1}$

Energy: -2617.227931

Energy (M06-2X-D3/def2-TZVP//B3LYP-D3(BJ)/def2-SVP): -2617.837450

Energy (TPSS-D3(BJ)/def2-TZVP//B3LYP-D3(BJ)/def2-SVP): -2618.410181

Energy (B3LYP-D3(BJ)/def2-TZVP//B3LYP-D3(BJ)/def2-SVP): -2618.345324

0 1

|    |          |          |          |
|----|----------|----------|----------|
| O  | -2.33253 | 1.51484  | 0.00562  |
| O  | -1.7653  | -0.33682 | 1.51666  |
| P  | -1.16765 | 0.37747  | 0.15584  |
| Cu | 0.79151  | 1.45248  | -0.05084 |
| C  | 2.21369  | 2.6902   | -0.55465 |
| H  | 2.73323  | 3.10646  | 0.32795  |
| H  | 2.98876  | 2.24143  | -1.2043  |
| H  | 1.7893   | 3.5446   | -1.11184 |
| C  | 2.25126  | -0.99522 | 1.25017  |
| H  | 1.71412  | -1.40594 | 2.10754  |

|   |          |          |          |
|---|----------|----------|----------|
| C | 2.04433  | -1.73227 | -0.01855 |
| O | 1.21426  | -2.62856 | -0.0786  |
| C | 2.95917  | 0.14183  | 1.36323  |
| H | 3.51089  | 0.57756  | 0.53079  |
| H | 3.02162  | 0.67574  | 2.31502  |
| C | 2.83748  | -1.30451 | -1.23313 |
| H | 2.57191  | -0.26596 | -1.49515 |
| H | 3.9188   | -1.31787 | -1.02734 |
| H | 2.60994  | -1.97063 | -2.07411 |
| C | -1.11096 | -1.43338 | 2.14611  |
| H | -1.88618 | -2.05445 | 2.61862  |
| H | -0.5406  | -2.04596 | 1.43011  |
| H | -0.42962 | -1.06639 | 2.93118  |
| C | -3.72441 | 1.22699  | 0.02322  |
| H | -4.00825 | 0.58538  | -0.8284  |
| H | -4.01556 | 0.73249  | 0.96283  |
| H | -4.25527 | 2.18485  | -0.06452 |
| N | -1.40279 | -0.8347  | -0.98778 |
| C | -2.41584 | -1.87212 | -0.91401 |
| H | -3.11917 | -1.80773 | -1.76496 |
| H | -1.943   | -2.87022 | -0.93366 |
| H | -2.98931 | -1.78054 | 0.01664  |
| C | -0.58027 | -0.85871 | -2.18483 |
| H | 0.16785  | -0.05246 | -2.13798 |
| H | -0.04902 | -1.82142 | -2.26714 |
| H | -1.18827 | -0.70249 | -3.09474 |

Optimized cuprate structure of the phosphoramidite ligand of the reaction pathway (B3LYP-D3(BJ)/def2-SVP)

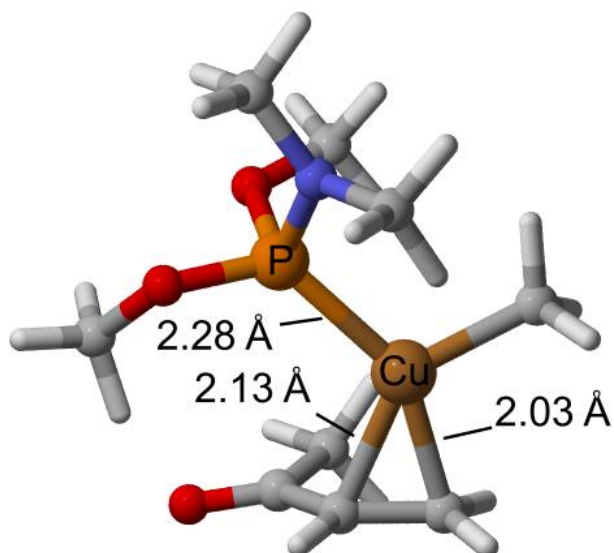

Energy: -2617.239665

Energy (M06-2X-D3/def2-TZVP//B3LYP-D3(BJ)/def2-SVP): -2617.834993

Energy (TPSS-D3(BJ)/def2-TZVP//B3LYP-D3(BJ)/def2-SVP): -2618.430015

Energy (B3LYP-D3(BJ)/def2-TZVP//B3LYP-D3(BJ)/def2-SVP): -2618.325897

0 1

|    |          |          |          |
|----|----------|----------|----------|
| O  | -1.25669 | 1.80743  | -0.89394 |
| P  | -1.05897 | 0.41207  | -0.06626 |
| Cu | 0.65625  | -1.08591 | -0.23076 |
| C  | 0.12545  | -2.82269 | 0.57518  |
| H  | 0.15743  | -3.63952 | -0.16673 |
| H  | 0.82428  | -3.09354 | 1.38593  |
| H  | -0.89192 | -2.78747 | 1.00013  |
| C  | 2.38135  | -0.13991 | -1.0535  |
| H  | 2.15406  | 0.21805  | -2.06229 |
| C  | 2.75035  | 0.92681  | -0.10001 |
| O  | 2.74307  | 2.10362  | -0.43091 |
| C  | 2.55252  | -1.50569 | -0.80655 |
| H  | 3.06187  | -1.86733 | 0.08898  |

|   |          |          |          |
|---|----------|----------|----------|
| H | 2.49125  | -2.22394 | -1.62841 |
| C | 3.12989  | 0.52482  | 1.31686  |
| H | 2.35474  | -0.11513 | 1.77059  |
| H | 4.06741  | -0.0543  | 1.3211   |
| H | 3.26195  | 1.43242  | 1.91871  |
| C | -0.34337 | 2.90187  | -0.77164 |
| H | -0.28229 | 3.23983  | 0.27441  |
| H | 0.66453  | 2.63105  | -1.11825 |
| H | -0.7422  | 3.71547  | -1.39286 |
| C | -3.77497 | 0.4252   | -0.07867 |
| H | -3.58303 | 1.25812  | 0.61042  |
| H | -4.18741 | 0.83706  | -1.01806 |
| H | -4.53393 | -0.23543 | 0.37445  |
| O | -1.17716 | 1.0509   | 1.45345  |
| C | -1.06582 | 0.18499  | 2.57484  |
| H | -1.11041 | 0.81095  | 3.47664  |
| H | -1.89148 | -0.54594 | 2.59587  |
| H | -0.11399 | -0.3726  | 2.5671   |
| N | -2.546   | -0.31909 | -0.30642 |
| C | -2.66049 | -1.48609 | -1.16325 |
| H | -3.02873 | -1.22288 | -2.173   |
| H | -1.68085 | -1.97489 | -1.26009 |
| H | -3.35915 | -2.21735 | -0.7221  |

Optimized reductive elimination transition structure of the phosphoramidite ligand of the reaction pathway (B3LYP-D3(BJ)/def2-SVP)

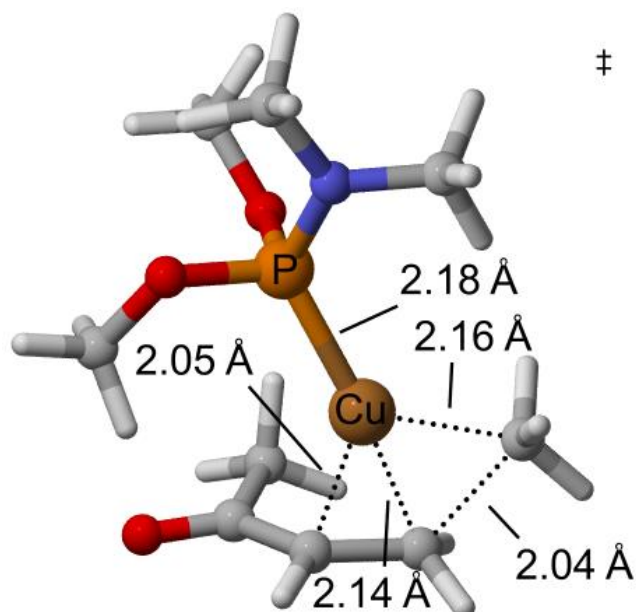

Imaginary frequency:  $-419.32 \text{ cm}^{-1}$

Energy:  $-2617.201998$

Energy (M06-2X-D3/def2-TZVP//B3LYP-D3(BJ)/def2-SVP):  $-2617.812609$

Energy (TPSS-D3(BJ)/def2-TZVP//B3LYP-D3(BJ)/def2-SVP):  $-2618.393766$

Energy (B3LYP-D3(BJ)/def2-TZVP//B3LYP-D3(BJ)/def2-SVP):  $-2618.318555$

0 1

|    |          |          |          |
|----|----------|----------|----------|
| O  | 1.45422  | -1.36694 | -1.05227 |
| O  | 1.1768   | -0.78892 | 1.43258  |
| P  | 1.14659  | -0.09699 | -0.06749 |
| Cu | -0.81313 | 0.84474  | -0.22349 |
| C  | -1.45031 | 2.79129  | 0.46126  |
| H  | -0.87864 | 2.64359  | 1.3929   |
| H  | -0.8113  | 3.26231  | -0.30665 |
| H  | -2.27109 | 3.48129  | 0.67922  |
| C  | -2.66984 | 0.13489  | -0.73961 |
| H  | -2.74727 | 0.06112  | -1.82938 |
| C  | -2.67275 | -1.13881 | -0.05097 |

|   |          |          |          |
|---|----------|----------|----------|
| O | -2.63826 | -2.21875 | -0.64997 |
| C | -2.86762 | 1.44484  | -0.12491 |
| H | -3.33746 | 1.45444  | 0.86346  |
| H | -3.31646 | 2.18516  | -0.79319 |
| C | -2.64686 | -1.15251 | 1.48121  |
| H | -3.23412 | -0.34606 | 1.94613  |
| H | -3.02384 | -2.12613 | 1.82237  |
| H | -1.6036  | -1.05272 | 1.83075  |
| C | 0.43613  | -2.36862 | -1.21534 |
| H | -0.50695 | -1.93887 | -1.58231 |
| H | 0.82676  | -3.09534 | -1.93924 |
| H | 0.22378  | -2.87546 | -0.26158 |
| C | 2.27102  | -1.57876 | 1.8814   |
| H | 3.17379  | -0.95966 | 2.01814  |
| H | 1.98743  | -2.0146  | 2.849    |
| H | 2.49962  | -2.39065 | 1.17218  |
| C | 3.84373  | 0.16481  | -0.70761 |
| H | 4.26936  | 0.7132   | -1.56674 |
| H | 4.57918  | 0.20553  | 0.11805  |
| H | 3.69838  | -0.87894 | -1.00833 |
| N | 2.57117  | 0.75223  | -0.32193 |
| C | 2.60452  | 2.15894  | 0.0345   |
| H | 3.22178  | 2.34571  | 0.93343  |
| H | 3.01881  | 2.76059  | -0.79408 |
| H | 1.58558  | 2.51787  | 0.24071  |

Optimized product structure of the phosphoramidite ligand of the reaction pathway (B3LYP-D3(BJ)/def2-SVP)

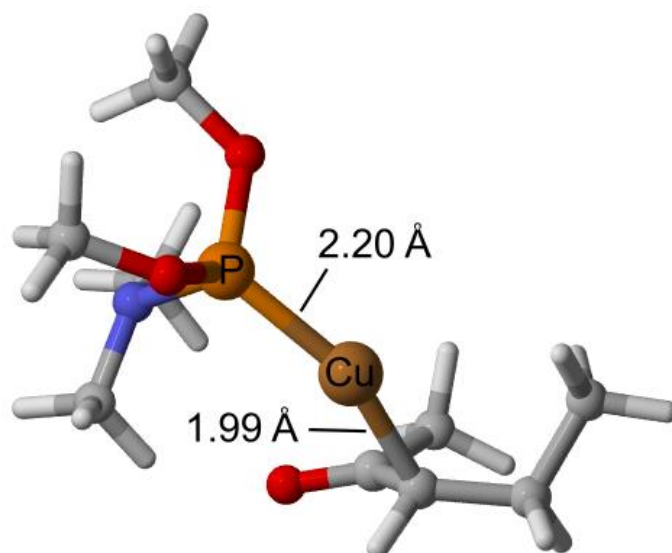

Energy: -2617.259480

Energy (M06-2X-D3/def2-TZVP//B3LYP-D3(BJ)/def2-SVP): -2617.872684

Energy (TPSS-D3(BJ)/def2-TZVP//B3LYP-D3(BJ)/def2-SVP): -2618.438126

Energy (B3LYP-D3(BJ)/def2-TZVP//B3LYP-D3(BJ)/def2-SVP): -2618.374040

0 1

|    |          |          |          |
|----|----------|----------|----------|
| O  | -1.94545 | -0.84501 | 1.52928  |
| O  | -2.40568 | -1.14334 | -1.05504 |
| P  | -1.40858 | -0.45848 | 0.03911  |
| Cu | 0.74673  | -0.70229 | -0.34696 |
| C  | 3.61378  | -1.90436 | 0.69665  |
| H  | 3.48992  | -1.33081 | 1.62844  |
| H  | 2.72231  | -2.5467  | 0.58906  |
| H  | 4.49248  | -2.55875 | 0.82557  |
| C  | 2.57529  | -0.06305 | -0.80159 |
| H  | 2.40927  | 0.11479  | -1.87731 |
| C  | 3.75865  | -0.9891  | -0.52304 |
| H  | 3.89929  | -1.62684 | -1.41171 |
| C  | 2.4107   | 1.2102   | -0.09498 |

|   |          |          |          |
|---|----------|----------|----------|
| O | 1.65522  | 2.11025  | -0.49596 |
| H | 4.70175  | -0.41456 | -0.42909 |
| C | 3.13824  | 1.42623  | 1.22989  |
| H | 4.18949  | 1.10263  | 1.19148  |
| H | 3.08255  | 2.49111  | 1.49175  |
| H | 2.64722  | 0.84262  | 2.0258   |
| C | -3.25685 | -0.57667 | 2.02292  |
| H | -3.65467 | 0.36896  | 1.62467  |
| H | -3.93754 | -1.40165 | 1.75911  |
| H | -3.18899 | -0.50875 | 3.11765  |
| C | -3.77959 | -0.81535 | -1.26026 |
| H | -4.41989 | -1.53261 | -0.72302 |
| H | -4.00373 | 0.20674  | -0.92094 |
| H | -3.98416 | -0.89405 | -2.33757 |
| C | -1.5526  | 1.78163  | -1.40734 |
| H | -2.12249 | 2.71948  | -1.50786 |
| H | -0.47672 | 1.99978  | -1.53577 |
| H | -1.88227 | 1.09823  | -2.20199 |
| N | -1.8213  | 1.19797  | -0.08382 |
| C | -1.32992 | 2.07025  | 0.99084  |
| H | -0.27638 | 2.36052  | 0.82512  |
| H | -1.94564 | 2.98436  | 1.01964  |
| H | -1.41774 | 1.56945  | 1.96402  |

Optimized separated structure of the phosphine ligand of the reaction pathway (B3LYP-D3(BJ)/def2-SVP)



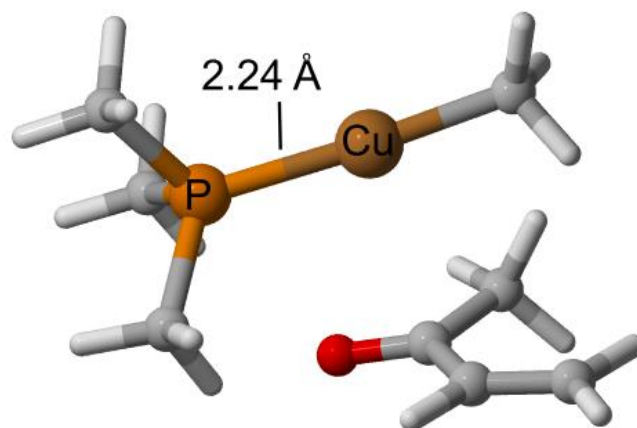

Energy: -2372.288687

Energy (M06-2X-D3/def2-TZVP//B3LYP-D3(BJ)/def2-SVP): -2372.694697

Energy (TPSS-D3(BJ)/def2-TZVP//B3LYP-D3(BJ)/def2-SVP): -2373.138726

Energy (B3LYP-D3(BJ)/def2-TZVP//B3LYP-D3(BJ)/def2-SVP): -2373.106402

0 1

|    |          |          |          |
|----|----------|----------|----------|
| P  | -1.82606 | -0.1801  | 0.08419  |
| Cu | -0.08429 | 1.2249   | -0.06718 |
| C  | 1.36474  | 2.50126  | -0.2664  |
| H  | 1.04729  | 3.53262  | -0.0261  |
| H  | 2.20826  | 2.25793  | 0.40529  |
| H  | 1.76151  | 2.53063  | -1.29919 |
| C  | 2.19321  | -0.91776 | 1.07865  |
| H  | 1.50374  | -1.30166 | 1.83644  |
| C  | 3.28711  | -0.23174 | 1.43303  |
| H  | 3.98468  | 0.16998  | 0.69454  |
| H  | 3.51274  | -0.02787 | 2.48282  |
| C  | 2.65215  | -0.73618 | -1.45783 |
| H  | 2.66388  | 0.3638   | -1.44345 |
| H  | 3.69147  | -1.0904  | -1.36722 |

|   |          |          |          |
|---|----------|----------|----------|
| H | 2.22664  | -1.089   | -2.40539 |
| C | 1.80925  | -1.2547  | -0.31641 |
| O | 0.8298   | -1.96102 | -0.51614 |
| C | -1.76005 | -1.48521 | 1.37776  |
| H | -0.89379 | -2.1228  | 1.15263  |
| H | -1.62295 | -1.02176 | 2.36613  |
| H | -2.68037 | -2.09053 | 1.38346  |
| C | -3.44196 | 0.64417  | 0.41141  |
| H | -3.39526 | 1.17095  | 1.37634  |
| H | -3.63662 | 1.38985  | -0.37385 |
| H | -4.27004 | -0.08218 | 0.43515  |
| C | -2.15296 | -1.14174 | -1.44776 |
| H | -2.33244 | -0.44846 | -2.28291 |
| H | -1.25565 | -1.73789 | -1.66542 |
| H | -3.02525 | -1.80409 | -1.32947 |

Optimized oxidative addition transition structure of the phosphine ligand of the reaction pathway (B3LYP-D3(BJ)/def2-SVP)

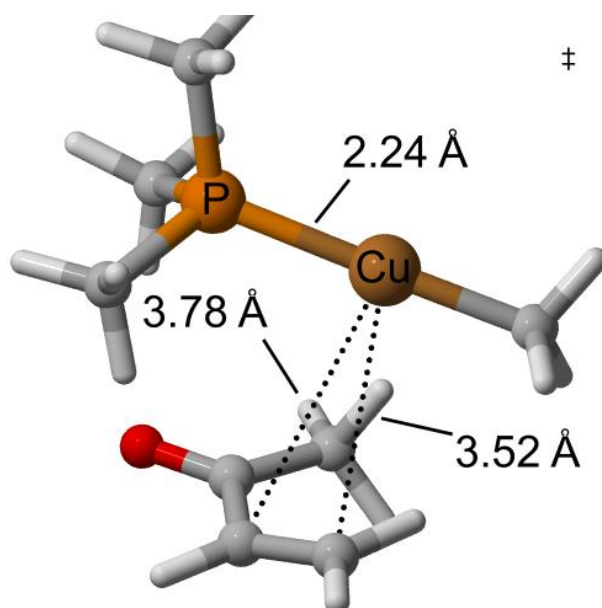

Imaginary frequency: -17.96 cm<sup>-1</sup>

Energy: -2372.286371

Energy (M06-2X-D3/def2-TZVP//B3LYP-D3(BJ)/def2-SVP): -2372.693127

Energy (TPSS-D3(BJ)/def2-TZVP//B3LYP-D3(BJ)/def2-SVP): -2373.138630

Energy (B3LYP-D3(BJ)/def2-TZVP//B3LYP-D3(BJ)/def2-SVP): -2373.106056

0 1

|    |          |          |          |
|----|----------|----------|----------|
| P  | -1.6225  | -0.36891 | 0.07637  |
| Cu | -0.28068 | 1.41906  | -0.11502 |
| C  | 0.8411   | 3.00107  | -0.24689 |
| H  | 1.25435  | 3.29143  | 0.73722  |
| H  | 1.69965  | 2.88398  | -0.93478 |
| H  | 0.26195  | 3.86804  | -0.61466 |
| C  | 2.41193  | -0.97766 | 1.03609  |
| H  | 2.39599  | -1.78258 | 1.78002  |
| C  | 1.97657  | -1.40726 | -0.3185  |
| O  | 1.39335  | -2.47412 | -0.44475 |
| C  | 2.70138  | 0.28709  | 1.37289  |
| H  | 2.67578  | 1.10449  | 0.6489   |
| H  | 2.94269  | 0.55556  | 2.4051   |
| C  | 2.20953  | -0.48566 | -1.49074 |
| H  | 1.57081  | 0.41087  | -1.37895 |
| H  | 3.25084  | -0.13257 | -1.52966 |
| H  | 1.9482   | -1.00473 | -2.42139 |
| C  | -1.63004 | -1.58557 | -1.30232 |
| H  | -1.85411 | -1.06585 | -2.24575 |
| H  | -0.63831 | -2.05518 | -1.37479 |
| H  | -2.38784 | -2.3659  | -1.12809 |
| C  | -1.25903 | -1.39346 | 1.56244  |

|   |          |          |          |
|---|----------|----------|----------|
| H | -1.74393 | -2.38014 | 1.51679  |
| H | -0.17016 | -1.50939 | 1.62719  |
| H | -1.60074 | -0.85448 | 2.45887  |
| C | -3.41023 | 0.03268  | 0.26833  |
| H | -3.76587 | 0.55029  | -0.63506 |
| H | -4.01186 | -0.87687 | 0.42435  |
| H | -3.54426 | 0.70956  | 1.12505  |

Optimized cuprate structure of the phosphine ligand of the reaction pathway (B3LYP-D3(BJ)/def2-SVP)

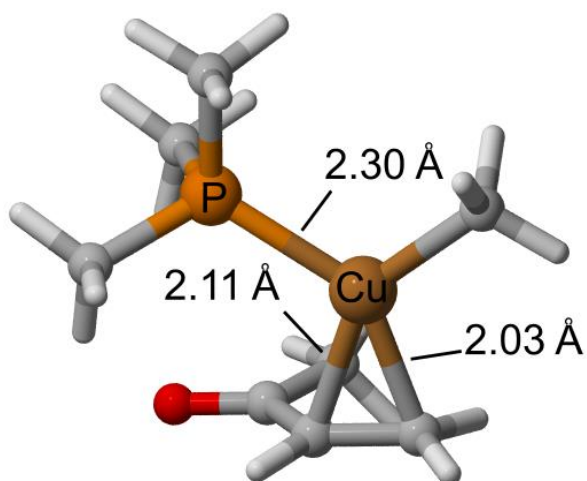

Energy: -2372.300354

Energy (M06-2X-D3/def2-TZVP//B3LYP-D3(BJ)/def2-SVP): -2372.691822

Energy (TPSS-D3(BJ)/def2-TZVP//B3LYP-D3(BJ)/def2-SVP): -2373.159857

Energy (B3LYP-D3(BJ)/def2-TZVP//B3LYP-D3(BJ)/def2-SVP): -2373.113326

0 1

|    |         |          |          |
|----|---------|----------|----------|
| P  | 1.49749 | -0.34279 | -0.01245 |
| Cu | -0.3124 | 1.06757  | -0.11921 |
| C  | 0.09429 | 2.88484  | 0.53273  |
| H  | 0.89635 | 3.31746  | -0.09261 |

|   |          |          |          |
|---|----------|----------|----------|
| H | -0.76051 | 3.5793   | 0.52078  |
| H | 0.47683  | 2.83114  | 1.56825  |
| C | -1.77659 | -0.20681 | -0.95718 |
| H | -1.46712 | -0.44735 | -1.97938 |
| C | -1.74552 | -1.35218 | -0.03528 |
| O | -1.26147 | -2.43062 | -0.36941 |
| C | -2.27448 | 1.0671   | -0.65431 |
| H | -2.82454 | 1.26255  | 0.26906  |
| H | -2.42908 | 1.798    | -1.45144 |
| C | -2.28482 | -1.15544 | 1.37286  |
| H | -3.33314 | -0.8188  | 1.35479  |
| H | -2.21279 | -2.10407 | 1.91943  |
| H | -1.70782 | -0.3804  | 1.90597  |
| C | 3.10778  | 0.52645  | 0.15507  |
| H | 3.0805   | 1.15749  | 1.05576  |
| H | 3.95133  | -0.17858 | 0.22315  |
| H | 3.25277  | 1.18692  | -0.7128  |
| C | 1.73141  | -1.45931 | -1.45255 |
| H | 0.82867  | -2.08444 | -1.53146 |
| H | 1.83629  | -0.8609  | -2.36993 |
| H | 2.62003  | -2.09918 | -1.33253 |
| C | 1.48945  | -1.516   | 1.40362  |
| H | 0.64343  | -2.20646 | 1.27172  |
| H | 2.42576  | -2.09468 | 1.44469  |
| H | 1.36283  | -0.96274 | 2.34591  |

Optimized reductive elimination transition structure of the phosphine ligand of the reaction pathway (B3LYP-D3(BJ)/def2-SVP)

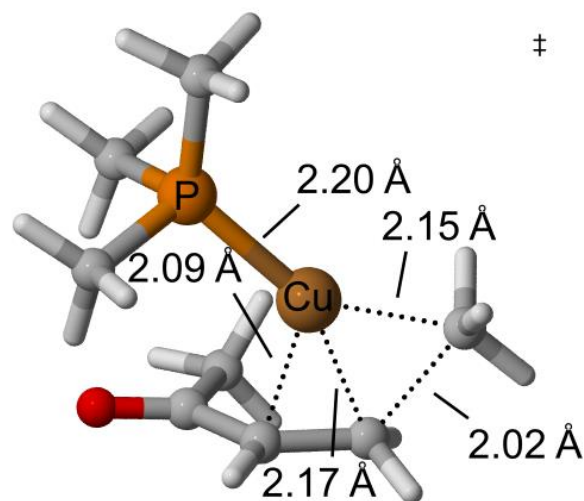

Imaginary frequency:  $-433.24 \text{ cm}^{-1}$

Energy: -2372.259962

Energy (M06-2X-D3/def2-TZVP//B3LYP-D3(BJ)/def2-SVP): -2372.668643

Energy (TPSS-D3(BJ)/def2-TZVP//B3LYP-D3(BJ)/def2-SVP): -2373.117698

Energy (B3LYP-D3(BJ)/def2-TZVP//B3LYP-D3(BJ)/def2-SVP): -2373.074243

0 1

|    |          |          |          |
|----|----------|----------|----------|
| P  | 1.69876  | 0.17836  | 0.05362  |
| Cu | -0.39372 | 0.86216  | -0.04542 |
| C  | -1.87315 | 2.35781  | 0.3812   |
| H  | -1.45531 | 2.39496  | 1.40284  |
| H  | -1.34149 | 3.07434  | -0.26859 |
| H  | -2.91817 | 2.67483  | 0.4454   |
| C  | -1.72007 | -0.48712 | -0.93245 |
| H  | -1.4317  | -0.50242 | -1.98851 |
| C  | -1.31926 | -1.62841 | -0.16051 |
| O  | -0.56681 | -2.52363 | -0.58791 |
| C  | -2.51831 | 0.63123  | -0.43705 |
| H  | -3.1707  | 0.41092  | 0.4138   |

|   |          |          |          |
|---|----------|----------|----------|
| H | -3.05597 | 1.17465  | -1.21981 |
| C | -1.81201 | -1.72469 | 1.2899   |
| H | -2.90407 | -1.60352 | 1.37028  |
| H | -1.52692 | -2.70731 | 1.68759  |
| H | -1.35405 | -0.94259 | 1.92261  |
| C | 2.03206  | -0.69903 | -1.52436 |
| H | 3.02565  | -1.1747  | -1.51827 |
| H | 1.24561  | -1.46719 | -1.62259 |
| H | 1.96653  | 0.00262  | -2.36886 |
| C | 1.89652  | -1.17328 | 1.28265  |
| H | 1.67168  | -0.81236 | 2.29666  |
| H | 1.18478  | -1.96697 | 1.0055   |
| H | 2.92152  | -1.57587 | 1.25598  |
| C | 3.17847  | 1.24346  | 0.31582  |
| H | 4.10786  | 0.65403  | 0.26082  |
| H | 3.20515  | 2.03097  | -0.45213 |
| H | 3.11479  | 1.72695  | 1.3022   |

Optimized product structure of the phosphine ligand of the reaction pathway (B3LYP-D3(BJ)/def2-SVP)

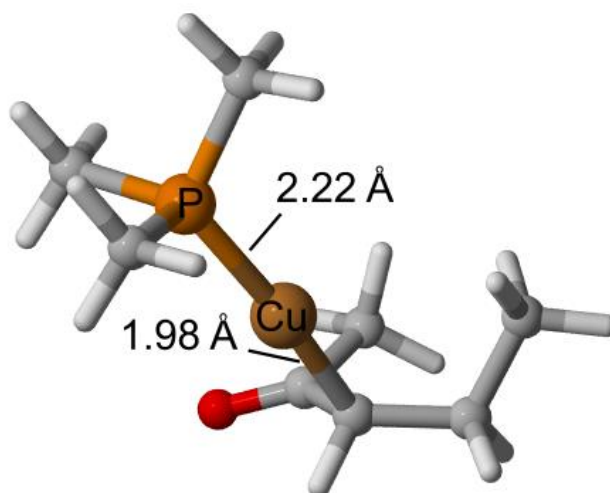

Energy: -2372.318055

Energy (M06-2X-D3/def2-TZVP//B3LYP-D3(BJ)/def2-SVP): -2372.733496

Energy (TPSS-D3(BJ)/def2-TZVP//B3LYP-D3(BJ)/def2-SVP): -2373.172783

Energy (B3LYP-D3(BJ)/def2-TZVP//B3LYP-D3(BJ)/def2-SVP): -2373.139523

0 1

|    |          |          |          |
|----|----------|----------|----------|
| P  | 2.16724  | 0.02117  | 0.08935  |
| Cu | 0.00242  | 0.17362  | -0.39187 |
| C  | -2.32875 | 2.20713  | 0.59909  |
| H  | -2.39099 | 1.66731  | 1.55677  |
| H  | -1.28111 | 2.53494  | 0.47779  |
| H  | -2.9593  | 3.10841  | 0.68676  |
| C  | -1.92767 | 0.05664  | -0.8092  |
| H  | -1.87492 | -0.21455 | -1.87754 |
| C  | -2.7522  | 1.32802  | -0.58222 |
| H  | -2.68137 | 1.93886  | -1.49819 |
| C  | -2.22996 | -1.18343 | -0.06418 |
| O  | -1.8696  | -2.2948  | -0.44824 |
| H  | -3.83035 | 1.09218  | -0.47839 |
| C  | -2.98185 | -1.07458 | 1.26436  |
| H  | -3.93005 | -0.52445 | 1.1538   |
| H  | -3.18047 | -2.08693 | 1.64005  |
| H  | -2.37804 | -0.52641 | 2.00537  |
| C  | 2.78104  | 1.08566  | 1.45835  |
| H  | 3.85114  | 0.91347  | 1.65475  |
| H  | 2.62463  | 2.14279  | 1.19703  |
| H  | 2.20498  | 0.87074  | 2.37055  |
| C  | 2.64786  | -1.67208 | 0.62035  |
| H  | 2.39289  | -2.38494 | -0.17758 |



|   |         |          |          |
|---|---------|----------|----------|
| H | 3.72428 | -1.73763 | 0.84479  |
| H | 2.06899 | -1.94805 | 1.51404  |
| C | 3.34198 | 0.38305  | -1.27918 |
| H | 4.38696 | 0.23996  | -0.96158 |
| H | 3.12528 | -0.28335 | -2.12719 |
| H | 3.20288 | 1.42118  | -1.6156  |

Optimized cuprate structure of the hydrido phosphine ligand of the reaction pathway (B3LYP-D3(BJ)/def2-SVP) with the *syn*-methyl-vinyl ketone

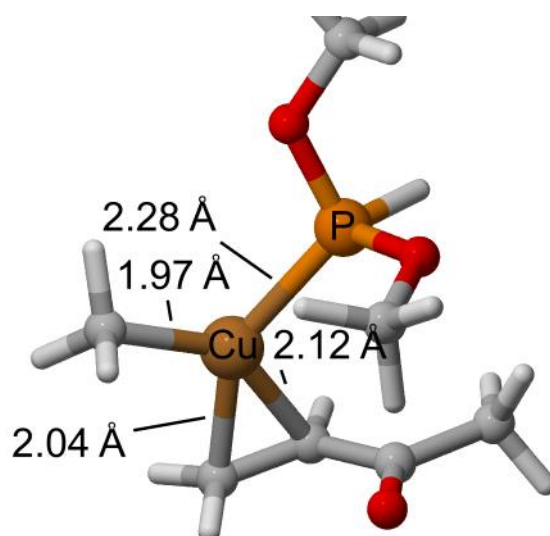

Energy: -2483.325979

Energy (TPSS-D3(BJ)/def2-TZVP//B3LYP-D3(BJ)/def2-SVP): -2484.350866

0 1

|    |          |          |          |
|----|----------|----------|----------|
| O  | -1.38714 | 1.44642  | 0.69929  |
| O  | -2.63505 | -0.50305 | -0.52349 |
| P  | -1.22282 | 0.31704  | -0.48072 |
| H  | -1.42724 | 1.2334   | -1.55877 |
| Cu | 0.54641  | -1.07478 | -0.14301 |
| C  | 0.02839  | -2.70124 | 0.83913  |
| H  | -1.03223 | -2.92915 | 0.64348  |

|   |          |          |          |
|---|----------|----------|----------|
| H | 0.64192  | -3.57376 | 0.56434  |
| H | 0.15586  | -2.5232  | 1.92128  |
| C | 2.19692  | 0.0031   | -0.92228 |
| H | 2.11935  | 0.06669  | -2.01149 |
| C | 2.03019  | 1.24007  | -0.13493 |
| O | 2.16763  | 1.25626  | 1.08429  |
| C | 2.57271  | -1.1919  | -0.30271 |
| H | 2.89728  | -1.16791 | 0.74076  |
| H | 2.85481  | -2.06576 | -0.89366 |
| C | 1.63057  | 2.50658  | -0.87374 |
| H | 1.51294  | 2.36201  | -1.95699 |
| H | 0.6865   | 2.88119  | -0.4478  |
| H | 2.39433  | 3.27912  | -0.6927  |
| C | -0.95961 | 1.13247  | 2.03682  |
| H | -1.16937 | 0.08037  | 2.28787  |
| H | 0.11706  | 1.32836  | 2.14219  |
| H | -1.53002 | 1.78367  | 2.71316  |
| C | -3.87683 | 0.17998  | -0.65731 |
| H | -3.90631 | 0.76653  | -1.59342 |
| H | -4.66912 | -0.58019 | -0.683   |
| H | -4.04702 | 0.86027  | 0.19225  |

Optimized reductive elimination transition structure of the hydrido phosphine ligand of the reaction pathway (B3LYP-D3(BJ)/def2-SVP) with the *syn*-methyl-vinyl ketone

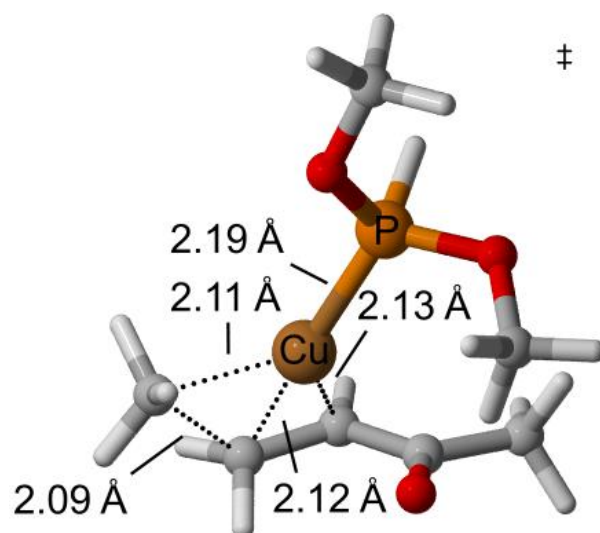

Imaginary frequency:  $-371.26 \text{ cm}^{-1}$

Energy:  $-2483.295708$

Energy (TPSS-D3(BJ)/def2-TZVP//B3LYP-D3(BJ)/def2-SVP):  $-2484.320923$

0 1

|    |          |          |          |
|----|----------|----------|----------|
| O  | -1.78579 | 1.52289  | -0.01308 |
| O  | -2.6863  | -0.93128 | -0.00197 |
| P  | -1.44503 | 0.00417  | -0.52297 |
| Cu | 0.55638  | -0.73468 | -0.04316 |
| C  | 1.18537  | -2.62571 | 0.65911  |
| H  | 0.41453  | -2.47292 | 1.43488  |
| H  | 0.78394  | -3.24425 | -0.1577  |
| H  | 2.02475  | -3.14363 | 1.13173  |
| C  | 2.42815  | -0.02727 | -0.77237 |
| H  | 2.64462  | -0.00971 | -1.84212 |
| C  | 2.03903  | 1.15424  | -0.07824 |
| O  | 1.6682   | 1.10081  | 1.13088  |
| C  | 2.61144  | -1.25559 | -0.00363 |
| H  | 2.99404  | -1.09815 | 1.00926  |

|   |          |          |          |
|---|----------|----------|----------|
| H | 3.11525  | -2.05899 | -0.54496 |
| C | 2.00481  | 2.48825  | -0.79781 |
| H | 0.96366  | 2.84746  | -0.84683 |
| H | 2.57215  | 3.22515  | -0.20792 |
| H | 2.41615  | 2.44066  | -1.81626 |
| C | -1.40168 | 1.91827  | 1.31748  |
| H | -1.69124 | 2.97244  | 1.42171  |
| H | -1.94699 | 1.32224  | 2.06794  |
| H | -0.31442 | 1.8061   | 1.46031  |
| C | -4.0332  | -0.58539 | -0.30882 |
| H | -4.19221 | -0.55099 | -1.40188 |
| H | -4.67968 | -1.36072 | 0.12417  |
| H | -4.2987  | 0.39517  | 0.11734  |
| H | -1.83755 | 0.23298  | -1.87455 |

Optimized product structure of the hydrido phosphine ligand of the reaction pathway (B3LYP-D3(BJ)/def2-SVP) with the *syn*-methyl-vinyl ketone

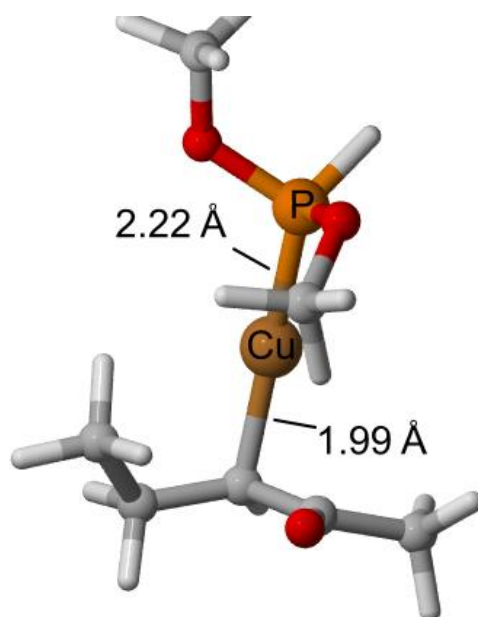

Energy: -2483.355115

Energy (TPSS-D3(BJ)/def2-TZVP//B3LYP-D3(BJ)/def2-SVP): -2484.369206

0 1

|    |          |          |          |
|----|----------|----------|----------|
| O  | -1.8822  | 1.40317  | 0.76888  |
| O  | -2.75739 | -0.81325 | -0.32306 |
| P  | -1.781   | 0.47272  | -0.56864 |
| Cu | 0.30532  | -0.18346 | -0.92395 |
| C  | 1.12106  | -2.10729 | 1.27123  |
| H  | 1.11336  | -1.2772  | 1.99082  |
| H  | 0.14154  | -2.12638 | 0.75604  |
| H  | 1.21823  | -3.0542  | 1.82822  |
| C  | 2.2103   | -0.62916 | -0.55233 |
| H  | 2.7533   | -0.69086 | -1.50705 |
| C  | 2.45736  | 0.62977  | 0.14807  |
| O  | 2.29743  | 0.79419  | 1.36498  |
| C  | 2.26737  | -1.91885 | 0.27103  |
| H  | 3.2213   | -1.95758 | 0.83203  |
| H  | 2.28494  | -2.77612 | -0.42321 |
| C  | 2.91629  | 1.82291  | -0.69189 |
| H  | 2.37344  | 2.72723  | -0.37743 |
| H  | 3.9847   | 2.00054  | -0.48279 |
| H  | 2.7943   | 1.66894  | -1.77416 |
| C  | -1.00266 | 1.14888  | 1.88125  |
| H  | -1.22647 | 1.9166   | 2.63284  |
| H  | -1.19786 | 0.15377  | 2.31092  |
| H  | 0.06083  | 1.21545  | 1.59613  |
| C  | -4.11879 | -0.63658 | 0.0645   |
| H  | -4.67394 | -0.06786 | -0.70261 |
| H  | -4.56205 | -1.63609 | 0.16494  |

|   |          |         |          |
|---|----------|---------|----------|
| H | -4.18969 | -0.1028 | 1.02502  |
| H | -2.60366 | 1.30515 | -1.38297 |

Optimized “syn”-structure of trans-chalcone of rotational analysis (B3LYP-D3(BJ)/def2-TZVP)

Energy: -654.338973

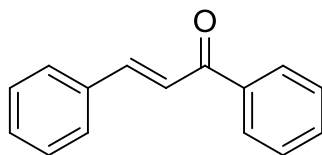

0 1

|   |             |             |             |
|---|-------------|-------------|-------------|
| C | -4.09365300 | 1.64503600  | -0.23444700 |
| C | -2.80882900 | 1.13307400  | -0.18933600 |
| C | -2.58951400 | -0.23736300 | 0.01324500  |
| C | -3.70522400 | -1.07007500 | 0.16659600  |
| C | -4.99375100 | -0.55742100 | 0.12211500  |
| C | -5.19238500 | 0.80250500  | -0.07836300 |
| H | -4.24442000 | 2.70511100  | -0.39256900 |
| H | -1.96738900 | 1.80098100  | -0.31479900 |
| H | -3.55010900 | -2.13049000 | 0.32226900  |
| H | -5.84177100 | -1.21872800 | 0.24331700  |
| H | -6.19554200 | 1.20690200  | -0.11436700 |
| C | -1.26219500 | -0.83292400 | 0.07045500  |
| C | -0.07983200 | -0.20936200 | -0.02807000 |
| C | 1.18202400  | -0.97869700 | 0.03154100  |
| C | 2.47742400  | -0.22834000 | 0.01549000  |
| C | 2.57250900  | 1.13830200  | 0.28819400  |
| C | 3.64539100  | -0.94511500 | -0.26061200 |
| C | 3.80774800  | 1.77351500  | 0.28556000  |
| H | 1.68917900  | 1.71243700  | 0.52882600  |
| C | 4.87555500  | -0.30915300 | -0.27736200 |
| H | 3.55989800  | -2.00445000 | -0.45871500 |

|   |             |             |             |
|---|-------------|-------------|-------------|
| C | 4.95993000  | 1.05325000  | -0.00311400 |
| H | 3.86996900  | 2.83054300  | 0.50940700  |
| H | 5.77203900  | -0.87276900 | -0.50131100 |
| H | 5.92152400  | 1.55026300  | -0.01213700 |
| O | 1.18364800  | -2.19918700 | 0.07775500  |
| H | -0.02514100 | 0.85947300  | -0.17282700 |
| H | -1.22861100 | -1.90917300 | 0.20951700  |

Optimized "anti"-structure of trans-chalcone of rotational analysis

Energy: -654.337405

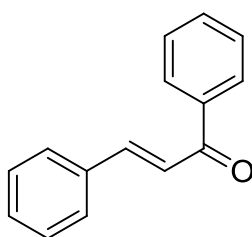

0 1

|   |             |             |             |
|---|-------------|-------------|-------------|
| C | -4.49283500 | 0.63336900  | 0.30921900  |
| C | -3.13850200 | 0.91891300  | 0.30880200  |
| C | -2.20401800 | -0.04698200 | -0.09004500 |
| C | -2.67789600 | -1.30348200 | -0.48630500 |
| C | -4.03552700 | -1.59003100 | -0.48665100 |
| C | -4.94811600 | -0.62174300 | -0.08851300 |
| H | -5.20055000 | 1.39096700  | 0.61994600  |
| H | -2.80274200 | 1.89857200  | 0.62014200  |
| H | -1.96689100 | -2.05916600 | -0.79751800 |
| H | -4.38045600 | -2.56754000 | -0.79756700 |
| H | -6.00802500 | -0.84007500 | -0.08718800 |
| C | -0.76491600 | 0.19326800  | -0.10649400 |
| C | -0.13085900 | 1.33215300  | 0.20748400  |
| C | 1.31994400  | 1.55794500  | 0.07268400  |
| C | 2.27230700  | 0.40306300  | 0.06907200  |
| C | 2.09728200  | -0.71589500 | 0.88514600  |

|   |             |             |             |
|---|-------------|-------------|-------------|
| C | 3.41065900  | 0.48910100  | -0.73488000 |
| C | 3.04155000  | -1.73492100 | 0.88983400  |
| H | 1.23761200  | -0.77648300 | 1.53799800  |
| C | 4.34089700  | -0.53838000 | -0.74616200 |
| H | 3.54976300  | 1.37256200  | -1.34295100 |
| C | 4.15836000  | -1.65296100 | 0.06734400  |
| H | 2.90663500  | -2.59072700 | 1.53857300  |
| H | 5.21298200  | -0.46999400 | -1.38353700 |
| H | 4.88932100  | -2.45132200 | 0.06507400  |
| O | 1.73987000  | 2.69732400  | -0.05582400 |
| H | -0.67840100 | 2.22587600  | 0.48148900  |
| H | -0.16818100 | -0.65175800 | -0.43107700 |

Optimized reductive elimination transition structure of the active catalyst system (MeCu • BIFOP-H • chalcone) of the reaction pathway (B3LYP-D3(BJ)/def2-SVP)**TS-3 (R)**

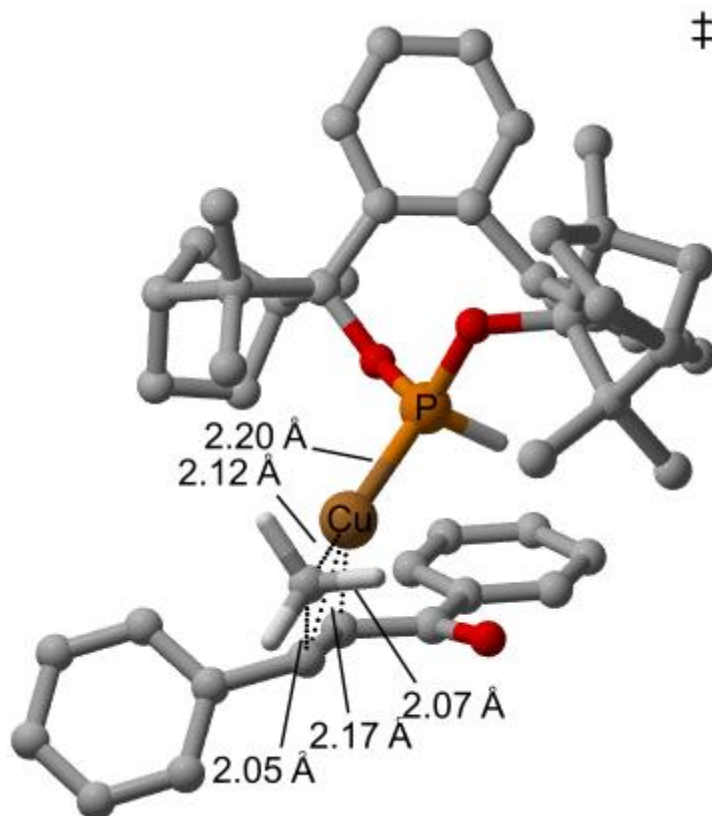



Imaginary frequency: -398.95 cm<sup>-1</sup>

Energy: -4068.823932

Energy (M06-2X-D3/def2-TZVP//B3LYP-D3(BJ)/def2-SVP): -4070.162638

0 1

|    |          |          |          |
|----|----------|----------|----------|
| Cu | 2.01238  | -0.85958 | -0.65155 |
| C  | 3.26802  | -1.85625 | -2.03859 |
| C  | 3.24542  | -1.03378 | 1.00045  |
| C  | 3.99662  | -1.57739 | -0.14302 |
| H  | 2.99038  | -1.038   | -2.72842 |
| H  | 4.27566  | -2.17598 | -2.313   |
| H  | 2.57813  | -2.70748 | -2.13081 |
| C  | -3.69123 | -1.63392 | 2.83638  |
| C  | -3.42393 | -1.9742  | 1.51125  |
| C  | -3.45684 | -0.33235 | 3.26221  |
| C  | -2.92719 | -1.06963 | 0.55908  |
| C  | -3.09674 | 0.61861  | 2.31176  |
| C  | -2.88085 | 0.30894  | 0.95689  |
| O  | -1.39697 | -0.62958 | -1.22372 |
| O  | -0.2829  | 1.16059  | 0.32244  |
| C  | -3.04599 | 1.52786  | 0.0626   |
| C  | -4.42467 | 1.83809  | -0.00906 |
| P  | -0.09201 | -0.36161 | -0.24203 |
| C  | -2.12519 | 2.43207  | -0.53375 |
| C  | -4.93823 | 2.93197  | -0.69039 |
| C  | -2.67989 | 3.52797  | -1.22739 |
| C  | -4.04265 | 3.78255  | -1.32893 |
| H  | -2.02422 | 4.24282  | -1.69999 |
| H  | -4.38924 | 4.65612  | -1.88578 |

|   |          |          |          |
|---|----------|----------|----------|
| H | -6.01523 | 3.11128  | -0.71655 |
| H | -5.11693 | 1.16817  | 0.50134  |
| H | -3.0435  | 1.6662   | 2.60589  |
| H | -3.60518 | -0.04017 | 4.30382  |
| H | -4.05683 | -2.39729 | 3.52672  |
| H | -3.59926 | -3.00002 | 1.21968  |
| H | -0.49935 | -1.0331  | 0.9338   |
| C | -2.41668 | -1.57653 | -0.81763 |
| C | -3.53562 | -1.65506 | -1.92681 |
| C | -1.78285 | -3.10691 | -0.92477 |
| C | -2.85112 | -1.83484 | -3.313   |
| C | -4.08626 | -3.07135 | -1.66237 |
| C | -2.76442 | -3.79187 | -1.92955 |
| C | -2.48546 | -3.33851 | -3.37122 |
| H | -1.98123 | -1.17295 | -3.40753 |
| H | -3.56041 | -1.55801 | -4.10696 |
| H | -4.48545 | -3.20029 | -0.64719 |
| H | -4.88075 | -3.34048 | -2.3761  |
| H | -2.76927 | -4.88459 | -1.80363 |
| H | -1.45866 | -3.52823 | -3.7067  |
| H | -3.15173 | -3.88158 | -4.05952 |
| C | -4.58236 | -0.56033 | -1.95018 |
| H | -5.10682 | -0.47803 | -0.99033 |
| H | -4.14663 | 0.41693  | -2.1929  |
| H | -5.33211 | -0.79618 | -2.7224  |
| C | -1.67945 | -3.96448 | 0.35263  |
| H | -2.63101 | -4.41662 | 0.65956  |
| H | -0.99394 | -4.79929 | 0.14412  |
| H | -1.25614 | -3.41055 | 1.20028  |

|   |          |          |          |
|---|----------|----------|----------|
| C | -0.34797 | -3.1039  | -1.48582 |
| H | -0.18757 | -2.4001  | -2.3086  |
| H | 0.3892   | -2.90541 | -0.69398 |
| H | -0.11914 | -4.11592 | -1.85379 |
| C | -0.59976 | 2.40896  | -0.29012 |
| C | 0.38868  | 2.82438  | -1.5275  |
| C | 1.08503  | 4.11617  | -0.97802 |
| H | 1.47181  | 4.74033  | -1.79748 |
| C | -0.28459 | 3.11155  | -2.88575 |
| H | 0.48259  | 3.06542  | -3.67379 |
| H | -1.05618 | 2.36565  | -3.12386 |
| H | -0.73357 | 4.10879  | -2.95862 |
| C | 1.4485   | 1.76344  | -1.85156 |
| H | 1.01915  | 0.92799  | -2.42106 |
| H | 2.22866  | 2.21938  | -2.48078 |
| H | 1.94315  | 1.36464  | -0.95655 |
| C | 0.02067  | 4.75727  | -0.07872 |
| H | 0.42174  | 5.59392  | 0.51467  |
| H | -0.8748  | 5.12045  | -0.59124 |
| C | -0.19661 | 3.50677  | 0.79214  |
| C | -1.14333 | 3.62918  | 1.97237  |
| H | -1.14789 | 2.69511  | 2.55259  |
| H | -0.8035  | 4.43709  | 2.6395   |
| H | -2.17324 | 3.85569  | 1.66195  |
| C | 1.26643  | 3.21629  | 1.24077  |
| H | 1.46443  | 3.74803  | 2.18336  |
| H | 1.41481  | 2.14894  | 1.43292  |
| C | 2.14192  | 3.76163  | 0.0837   |
| H | 2.67449  | 4.67694  | 0.3838   |

|   |          |          |          |
|---|----------|----------|----------|
| H | 2.90692  | 3.0527   | -0.25623 |
| C | 2.26194  | -1.84977 | 1.64619  |
| C | 5.24364  | -0.82748 | -0.4789  |
| C | 5.20396  | 0.53567  | -0.81449 |
| C | 6.48793  | -1.47133 | -0.44243 |
| C | 6.37558  | 1.23816  | -1.09499 |
| H | 4.23947  | 1.04495  | -0.86736 |
| C | 7.66433  | -0.76954 | -0.72176 |
| H | 6.53326  | -2.53223 | -0.18338 |
| C | 7.61323  | 0.58758  | -1.04784 |
| H | 6.3231   | 2.29812  | -1.35622 |
| H | 8.62584  | -1.28751 | -0.68318 |
| H | 8.53204  | 1.13602  | -1.26846 |
| H | 4.12786  | -2.66094 | -0.06951 |
| O | 1.94297  | -2.97786 | 1.2023   |
| C | 1.47999  | -1.29254 | 2.81322  |
| C | 1.62048  | 0.01728  | 3.29819  |
| C | 0.48877  | -2.11264 | 3.37607  |
| C | 0.78238  | 0.49877  | 4.3054   |
| H | 2.3792   | 0.67832  | 2.87983  |
| C | -0.34669 | -1.63618 | 4.38561  |
| H | 0.39374  | -3.12562 | 2.98238  |
| C | -0.20738 | -0.32499 | 4.84999  |
| H | 0.89772  | 1.52605  | 4.66004  |
| H | -1.12093 | -2.28432 | 4.80248  |
| H | -0.86998 | 0.056    | 5.63094  |
| H | 3.55631  | -0.07672 | 1.41528  |

Optimized reductive elimination transition structure of the active catalyst system (MeCu • BIFOP-H • chalcone) of the reaction pathway (B3LYP-D3(BJ)/def2-SVP) **TS-3.1 (R)**

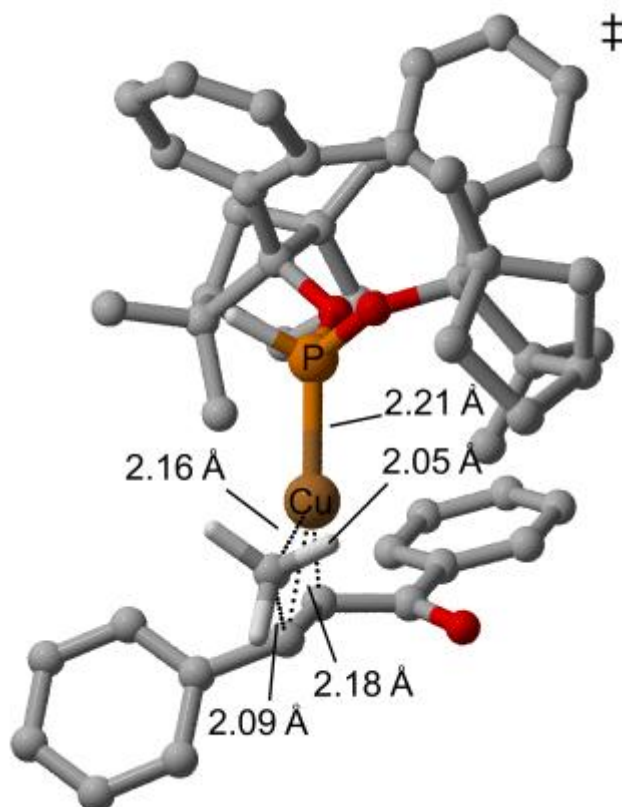

Imaginary frequency:  $-384.51 \text{ cm}^{-1}$

Energy:  $-4068.821521$

Energy (M06-2X-D3/def2-TZVP//B3LYP-D3(BJ)/def2-SVP):  $-4070.162732$

0 1

|    |          |          |          |
|----|----------|----------|----------|
| Cu | 1.92381  | -0.81074 | -0.53159 |
| C  | 2.92383  | -2.06382 | -1.97736 |
| C  | 3.52621  | -0.49632 | 0.71081  |
| C  | 4.05673  | -1.25753 | -0.42151 |
| H  | 2.63244  | -1.40747 | -2.81233 |
| H  | 3.84301  | -2.58217 | -2.26133 |
| H  | 2.15196  | -2.82778 | -1.78445 |
| C  | -2.88354 | 2.99224  | -3.58096 |

|   |          |          |          |
|---|----------|----------|----------|
| C | -2.22436 | 3.16131  | -2.36333 |
| C | -3.50172 | 1.77727  | -3.8543  |
| C | -2.14546 | 2.16758  | -1.37451 |
| C | -3.56999 | 0.82937  | -2.83579 |
| C | -2.97124 | 1.01101  | -1.57599 |
| O | -0.77589 | 0.96289  | 0.17396  |
| O | -1.29348 | -1.2144  | -1.14411 |
| C | -3.64827 | 0.18202  | -0.49959 |
| C | -4.90854 | 0.76794  | -0.22891 |
| P | -0.13257 | -0.09492 | -0.91559 |
| C | -3.33245 | -1.05256 | 0.12388  |
| C | -5.82662 | 0.24393  | 0.66821  |
| C | -4.28325 | -1.55268 | 1.03934  |
| C | -5.49273 | -0.93347 | 1.32931  |
| H | -4.09101 | -2.48624 | 1.54431  |
| H | -6.17277 | -1.38949 | 2.05236  |
| H | -6.7798  | 0.74762  | 0.84261  |
| H | -5.1586  | 1.68924  | -0.75626 |
| H | -4.17849 | -0.06351 | -2.98071 |
| H | -3.98532 | 1.58994  | -4.81564 |
| H | -2.88796 | 3.80509  | -4.31051 |
| H | -1.74104 | 4.11269  | -2.19143 |
| H | -0.33781 | 0.6143   | -2.13151 |
| C | -1.15909 | 2.31332  | -0.18362 |
| C | -1.76026 | 3.02975  | 1.08604  |
| C | 0.21735  | 3.20975  | -0.40097 |
| C | -0.78803 | 2.82274  | 2.28637  |
| C | -1.49585 | 4.50317  | 0.71428  |
| C | 0.02549  | 4.36087  | 0.63979  |

|   |          |          |          |
|---|----------|----------|----------|
| C | 0.33113  | 3.86782  | 2.06142  |
| H | -0.41122 | 1.79359  | 2.32766  |
| H | -1.32855 | 3.0036   | 3.2266   |
| H | -1.97953 | 4.80909  | -0.22382 |
| H | -1.82731 | 5.19139  | 1.50729  |
| H | 0.5872   | 5.26202  | 0.35236  |
| H | 1.33854  | 3.45629  | 2.18465  |
| H | 0.24012  | 4.70804  | 2.76733  |
| C | -3.19336 | 2.7113   | 1.4583   |
| H | -3.88752 | 2.93591  | 0.63968  |
| H | -3.31737 | 1.65781  | 1.73972  |
| H | -3.48502 | 3.32791  | 2.32338  |
| C | 0.51564  | 3.82323  | -1.78414 |
| H | -0.06016 | 4.73103  | -2.00163 |
| H | 1.57412  | 4.12612  | -1.79516 |
| H | 0.36824  | 3.11126  | -2.60832 |
| C | 1.47287  | 2.3866   | -0.07561 |
| H | 1.38775  | 1.75978  | 0.81478  |
| H | 1.74424  | 1.73246  | -0.91889 |
| H | 2.32429  | 3.06998  | 0.06419  |
| C | -2.15734 | -1.96799 | -0.27682 |
| C | -1.37945 | -2.77643 | 0.90679  |
| C | -1.64271 | -4.26909 | 0.51598  |
| H | -1.51958 | -4.93524 | 1.38229  |
| C | -1.84508 | -2.51028 | 2.35451  |
| H | -1.057   | -2.85942 | 3.0376   |
| H | -1.99506 | -1.43855 | 2.54605  |
| H | -2.75803 | -3.04698 | 2.63858  |
| C | 0.12017  | -2.49321 | 0.94655  |

|   |          |          |          |
|---|----------|----------|----------|
| H | 0.3246   | -1.50405 | 1.37849  |
| H | 0.63095  | -3.21748 | 1.59397  |
| H | 0.60186  | -2.57039 | -0.03395 |
| C | -3.03392 | -4.24031 | -0.1289  |
| H | -3.29735 | -5.19722 | -0.60655 |
| H | -3.85841 | -3.97215 | 0.53808  |
| C | -2.67758 | -3.1728  | -1.18064 |
| C | -3.74896 | -2.80321 | -2.19142 |
| H | -3.35626 | -2.07561 | -2.91693 |
| H | -4.06074 | -3.6991  | -2.75098 |
| H | -4.64124 | -2.37167 | -1.71591 |
| C | -1.43839 | -3.8446  | -1.8426  |
| H | -1.78353 | -4.48818 | -2.66552 |
| H | -0.75932 | -3.1009  | -2.27464 |
| C | -0.79502 | -4.67745 | -0.70244 |
| H | -0.91436 | -5.75645 | -0.88373 |
| H | 0.27948  | -4.49628 | -0.57815 |
| C | 3.05506  | -1.20994 | 1.86578  |
| C | 5.05573  | -0.56192 | -1.28224 |
| C | 4.79669  | 0.70366  | -1.83425 |
| C | 6.29596  | -1.16186 | -1.54298 |
| C | 5.75208  | 1.35309  | -2.61532 |
| H | 3.83046  | 1.17994  | -1.65448 |
| C | 7.25668  | -0.5123  | -2.3231  |
| H | 6.511    | -2.14677 | -1.12053 |
| C | 6.98911  | 0.7479   | -2.8623  |
| H | 5.53005  | 2.33653  | -3.03742 |
| H | 8.21944  | -0.99471 | -2.50942 |
| H | 7.73804  | 1.25584  | -3.47452 |



|   |         |          |          |
|---|---------|----------|----------|
| H | 4.34088 | -2.2693  | -0.12196 |
| O | 2.9991  | -2.45192 | 1.91691  |
| C | 2.50546 | -0.41063 | 3.0273   |
| C | 2.72068 | 0.96475  | 3.21104  |
| C | 1.7065  | -1.09275 | 3.95844  |
| C | 2.13759 | 1.64045  | 4.28512  |
| H | 3.35993 | 1.51553  | 2.51995  |
| C | 1.10751 | -0.41692 | 5.02182  |
| H | 1.57503 | -2.16626 | 3.81642  |
| C | 1.31833 | 0.95552  | 5.18752  |
| H | 2.32246 | 2.70897  | 4.41873  |
| H | 0.47711 | -0.96247 | 5.72889  |
| H | 0.85416 | 1.48843  | 6.02106  |
| H | 3.70173 | 0.57698  | 0.75145  |

Optimized reductive elimination transition structure of the active catalyst system (MeCu • BIFOP-H • chalcone) of the reaction pathway (B3LYP-D3(BJ)/def2-SVP)**TS-8.3 (R)**

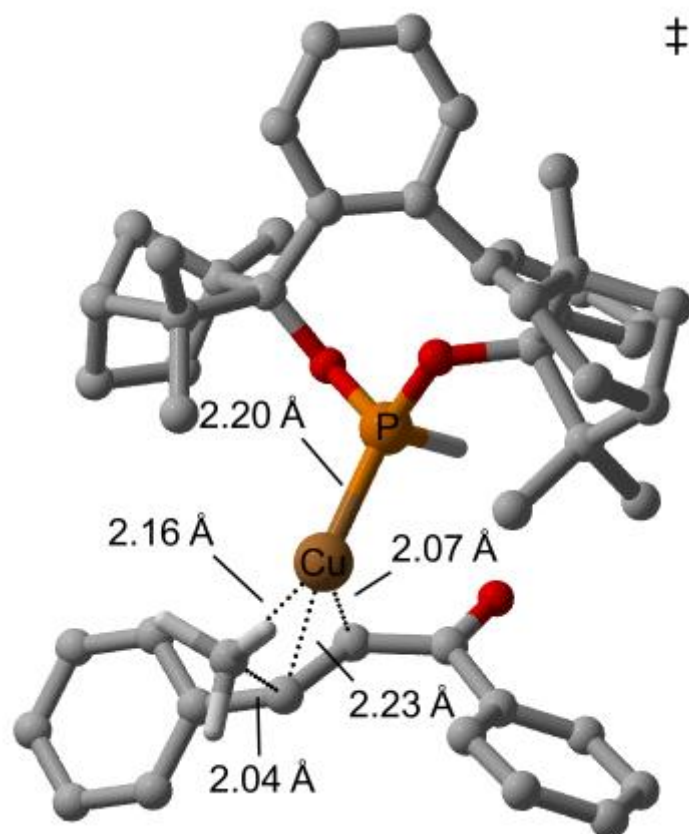

Imaginary frequency:  $-436.41 \text{ cm}^{-1}$

Energy:  $-4068.809011$

Energy (M06-2X-D3/def2-TZVP//B3LYP-D3(BJ)/def2-SVP):  $-4070.149969$

0 1

|    |          |          |          |
|----|----------|----------|----------|
| Cu | -1.91554 | 0.00861  | -0.71445 |
| C  | -3.58999 | -0.41478 | -2.01389 |
| C  | -3.06103 | 0.17875  | 0.99714  |
| C  | -4.03562 | -0.18895 | -0.0376  |
| H  | -3.38259 | -1.46759 | -2.24455 |
| H  | -4.62288 | -0.18053 | -2.28536 |
| H  | -2.9432  | 0.24483  | -2.63068 |
| C  | 2.71966  | 2.16512  | 3.48755  |
| C  | 2.52971  | 2.4845   | 2.14439  |

|   |         |          |          |
|---|---------|----------|----------|
| C | 2.91434 | 0.83741  | 3.84723  |
| C | 2.51761 | 1.53453  | 1.1115   |
| C | 3.02847 | -0.11241 | 2.83552  |
| C | 2.8808  | 0.1926   | 1.47015  |
| O | 1.48125 | 0.75133  | -0.89194 |
| O | 0.74784 | -1.3797  | 0.47505  |
| C | 3.51615 | -0.8617  | 0.57578  |
| C | 4.92193 | -0.7538  | 0.68733  |
| P | 0.20138 | 0.04818  | -0.11378 |
| C | 2.98832 | -1.94548 | -0.18263 |
| C | 5.81898 | -1.58309 | 0.02886  |
| C | 3.9256  | -2.75282 | -0.85929 |
| C | 5.30415 | -2.586   | -0.78408 |
| H | 3.57694 | -3.57778 | -1.46073 |
| H | 5.96104 | -3.25887 | -1.34005 |
| H | 6.89498 | -1.43965 | 0.14896  |
| H | 5.31482 | 0.04015  | 1.32266  |
| H | 3.30678 | -1.13197 | 3.09915  |
| H | 3.02878 | 0.5439   | 4.89304  |
| H | 2.69197 | 2.95606  | 4.24001  |
| H | 2.36476 | 3.52454  | 1.9027   |
| H | 0.19738 | 0.74569  | 1.11906  |
| C | 2.08157 | 1.94329  | -0.32041 |
| C | 3.27289 | 2.44007  | -1.22693 |
| C | 1.01932 | 3.20017  | -0.5186  |
| C | 2.78671 | 2.51165  | -2.70441 |
| C | 3.305   | 3.93124  | -0.83171 |
| C | 1.88452 | 4.23718  | -1.30764 |
| C | 2.00191 | 3.84415  | -2.78895 |

|   |          |          |          |
|---|----------|----------|----------|
| H | 2.17988  | 1.63291  | -2.95785 |
| H | 3.65808  | 2.50933  | -3.37565 |
| H | 3.47806  | 4.09243  | 0.24059  |
| H | 4.07797  | 4.48475  | -1.38771 |
| H | 1.52553  | 5.26445  | -1.1487  |
| H | 1.03904  | 3.75681  | -3.30709 |
| H | 2.58264  | 4.6116   | -3.32408 |
| C | 4.60226  | 1.72454  | -1.1057  |
| H | 4.97487  | 1.72976  | -0.07424 |
| H | 4.53906  | 0.68433  | -1.44837 |
| H | 5.34622  | 2.24138  | -1.73307 |
| C | 0.40262  | 3.87426  | 0.72488  |
| H | 1.08192  | 4.5751   | 1.22611  |
| H | -0.45723 | 4.4739   | 0.38979  |
| H | 0.01374  | 3.15615  | 1.4607   |
| C | -0.19963 | 2.77671  | -1.35827 |
| H | 0.03909  | 2.1476   | -2.22098 |
| H | -0.93464 | 2.24734  | -0.73657 |
| H | -0.72007 | 3.67889  | -1.71102 |
| C | 1.51942  | -2.42652 | -0.11421 |
| C | 0.83893  | -3.08143 | -1.45229 |
| C | 0.59109  | -4.5652  | -1.00906 |
| H | 0.52482  | -5.23623 | -1.87849 |
| C | 1.67239  | -3.0329  | -2.74991 |
| H | 0.99808  | -3.18517 | -3.60656 |
| H | 2.16612  | -2.0592  | -2.88003 |
| H | 2.43292  | -3.81931 | -2.82141 |
| C | -0.49883 | -2.43543 | -1.84068 |
| H | -0.34865 | -1.48377 | -2.36643 |

|   |          |          |          |
|---|----------|----------|----------|
| H | -1.02818 | -3.1108  | -2.53072 |
| H | -1.16223 | -2.25677 | -0.98729 |
| C | 1.71865  | -4.85097 | -0.011   |
| H | 1.57781  | -5.8054  | 0.52019  |
| H | 2.73065  | -4.85338 | -0.42596 |
| C | 1.40504  | -3.65105 | 0.90024  |
| C | 2.21996  | -3.52269 | 2.17398  |
| H | 1.86891  | -2.66751 | 2.76831  |
| H | 2.09672  | -4.43023 | 2.78574  |
| H | 3.29256  | -3.39211 | 1.97263  |
| C | -0.10703 | -3.89504 | 1.18792  |
| H | -0.20661 | -4.50095 | 2.10036  |
| H | -0.63177 | -2.94936 | 1.3706   |
| C | -0.6195  | -4.65628 | -0.06222 |
| H | -0.8167  | -5.71385 | 0.17116  |
| H | -1.54914 | -4.24883 | -0.47656 |
| C | -2.6541  | 1.48297  | 1.44548  |
| C | -4.68607 | -1.52699 | 0.12425  |
| C | -3.94743 | -2.6645  | 0.49057  |
| C | -6.06105 | -1.67154 | -0.10528 |
| C | -4.56536 | -3.90712 | 0.62305  |
| H | -2.87583 | -2.57843 | 0.67611  |
| C | -6.68554 | -2.91444 | 0.03317  |
| H | -6.65072 | -0.79623 | -0.39102 |
| C | -5.93972 | -4.0381  | 0.39528  |
| H | -3.96957 | -4.77805 | 0.90698  |
| H | -7.76035 | -3.00325 | -0.14298 |
| H | -6.42522 | -5.01108 | 0.50099  |
| H | -4.76251 | 0.59588  | -0.25497 |

|   |          |          |          |
|---|----------|----------|----------|
| O | -1.83074 | 1.61856  | 2.37164  |
| C | -3.19527 | 2.7559   | 0.82176  |
| C | -3.592   | 2.9005   | -0.51735 |
| C | -3.2147  | 3.89548  | 1.64462  |
| C | -3.99806 | 4.14189  | -1.01735 |
| H | -3.54551 | 2.05821  | -1.20506 |
| C | -3.63724 | 5.12974  | 1.15549  |
| H | -2.86812 | 3.78053  | 2.67256  |
| C | -4.03038 | 5.2596   | -0.1819  |
| H | -4.28453 | 4.23322  | -2.06817 |
| H | -3.65239 | 6.00052  | 1.81605  |
| H | -4.35297 | 6.22859  | -0.57082 |
| H | -2.6841  | -0.61462 | 1.64758  |

Optimized reductive elimination transition structure of the active catalyst system (MeCu • BIFOP-H • chalcone) of the reaction pathway (B3LYP-D3(BJ)/def2-SVP)**TS-8.2 (R)**

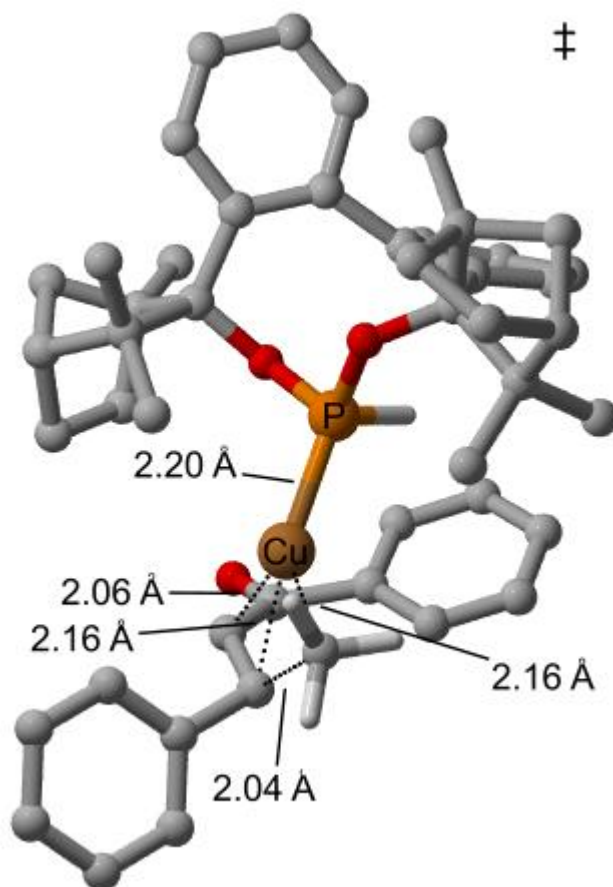

Imaginary frequency:  $-404.21 \text{ cm}^{-1}$

Energy:  $-4068.813337$

Energy (M06-2X-D3/def2-TZVP//B3LYP-D3(BJ)/def2-SVP):  $-4070.150382$

0 1

|    |          |          |          |
|----|----------|----------|----------|
| Cu | 2.04841  | -0.61298 | -0.15817 |
| C  | 3.2211   | -2.01725 | -1.30448 |
| C  | 3.53286  | -0.04423 | 1.15632  |
| C  | 4.13708  | -1.02526 | 0.23073  |
| H  | 2.7796   | -1.49253 | -2.17058 |
| H  | 4.20939  | -2.36749 | -1.61159 |
| H  | 2.60371  | -2.88061 | -1.02182 |
| C  | -3.81088 | -2.18047 | 2.51791  |
| C  | -3.49715 | -2.29328 | 1.16275  |

|   |          |          |          |
|---|----------|----------|----------|
| C | -3.60474 | -0.96693 | 3.16425  |
| C | -2.98667 | -1.23677 | 0.39311  |
| C | -3.24702 | 0.13768  | 2.39411  |
| C | -3.00778 | 0.05974  | 1.01107  |
| O | -1.28218 | -0.51633 | -1.11808 |
| O | -0.46519 | 1.14987  | 0.65778  |
| C | -3.22426 | 1.39245  | 0.31969  |
| C | -4.61825 | 1.64409  | 0.28966  |
| P | -0.12681 | -0.32265 | 0.05628  |
| C | -2.34585 | 2.40726  | -0.13559 |
| C | -5.18144 | 2.8011   | -0.22491 |
| C | -2.9522  | 3.57135  | -0.65655 |
| C | -4.32403 | 3.77713  | -0.72385 |
| H | -2.33037 | 4.38137  | -1.00545 |
| H | -4.71015 | 4.70973  | -1.14161 |
| H | -6.26532 | 2.93485  | -0.23032 |
| H | -5.2775  | 0.87176  | 0.68811  |
| H | -3.21912 | 1.12621  | 2.85525  |
| H | -3.783   | -0.85723 | 4.23636  |
| H | -4.18688 | -3.05149 | 3.05919  |
| H | -3.64632 | -3.25784 | 0.69895  |
| H | -0.65924 | -1.10369 | 1.10764  |
| C | -2.34428 | -1.49401 | -0.99966 |
| C | -3.33414 | -1.33635 | -2.22046 |
| C | -1.6971  | -2.98503 | -1.33247 |
| C | -2.49875 | -1.22727 | -3.52836 |
| C | -3.88243 | -2.77445 | -2.31587 |
| C | -2.52633 | -3.43001 | -2.57728 |
| C | -2.08078 | -2.68447 | -3.84398 |



|   |          |          |          |
|---|----------|----------|----------|
| H | -1.64643 | -0.54983 | -3.3946  |
| H | -3.12919 | -0.80583 | -4.32512 |
| H | -4.38136 | -3.10792 | -1.39428 |
| H | -4.59245 | -2.88857 | -3.14987 |
| H | -2.52713 | -4.52436 | -2.68876 |
| H | -1.01301 | -2.79697 | -4.07035 |
| H | -2.63323 | -3.07644 | -4.71206 |
| C | -4.39702 | -0.25968 | -2.14016 |
| H | -5.02167 | -0.36779 | -1.2454  |
| H | -3.96227 | 0.74759  | -2.13912 |
| H | -5.05509 | -0.34119 | -3.02011 |
| C | -1.77173 | -4.10413 | -0.27553 |
| H | -2.76691 | -4.5577  | -0.18407 |
| H | -1.09789 | -4.91276 | -0.59893 |
| H | -1.43426 | -3.77548 | 0.71487  |
| C | -0.20028 | -2.88356 | -1.66438 |
| H | 0.05931  | -2.0551  | -2.32957 |
| H | 0.39545  | -2.77843 | -0.74633 |
| H | 0.12223  | -3.82086 | -2.14267 |
| C | -0.81803 | 2.41406  | 0.08478  |
| C | 0.11811  | 2.89064  | -1.16594 |
| C | 0.88708  | 4.10539  | -0.5515  |
| H | 1.30209  | 4.75135  | -1.34012 |
| C | -0.63366 | 3.33028  | -2.43987 |
| H | 0.08884  | 3.38864  | -3.26796 |
| H | -1.41263 | 2.60858  | -2.72347 |
| H | -1.09382 | 4.32166  | -2.36618 |
| C | 1.10423  | 1.82803  | -1.66085 |
| H | 0.59059  | 1.01157  | -2.18856 |

|   |          |          |          |
|---|----------|----------|----------|
| H | 1.79888  | 2.29415  | -2.37687 |
| H | 1.71595  | 1.4128   | -0.85037 |
| C | -0.14999 | 4.75321  | 0.37526  |
| H | 0.2865   | 5.54605  | 1.00251  |
| H | -1.02251 | 5.1824   | -0.12638 |
| C | -0.41364 | 3.47797  | 1.20083  |
| C | -1.38613 | 3.56875  | 2.36474  |
| H | -1.45502 | 2.59612  | 2.87555  |
| H | -1.02546 | 4.30541  | 3.09925  |
| H | -2.39636 | 3.86617  | 2.04938  |
| C | 1.03688  | 3.16046  | 1.66182  |
| H | 1.24471  | 3.73451  | 2.57645  |
| H | 1.1885   | 2.10962  | 1.91964  |
| C | 1.92701  | 3.64419  | 0.48747  |
| H | 2.54954  | 4.50175  | 0.78446  |
| H | 2.61571  | 2.8721   | 0.12452  |
| C | 2.77862  | -0.2073  | 2.38069  |
| C | 5.25863  | -0.43583 | -0.57011 |
| C | 5.0533   | 0.68604  | -1.3888  |
| C | 6.54373  | -0.98866 | -0.50035 |
| C | 6.10715  | 1.24418  | -2.11143 |
| H | 4.05401  | 1.12001  | -1.46203 |
| C | 7.60265  | -0.42958 | -1.22219 |
| H | 6.71901  | -1.86154 | 0.13415  |
| C | 7.38877  | 0.68896  | -2.03011 |
| H | 5.92758  | 2.11687  | -2.74425 |
| H | 8.59978  | -0.87076 | -1.14956 |
| H | 8.21491  | 1.126    | -2.59583 |
| H | 4.42252  | -1.98279 | 0.67436  |

|   |          |          |         |
|---|----------|----------|---------|
| O | 2.68614  | 0.72134  | 3.19344 |
| C | 1.8945   | -1.42624 | 2.62248 |
| C | 2.03575  | -2.6899  | 2.02186 |
| C | 0.79218  | -1.21626 | 3.47116 |
| C | 1.08513  | -3.69396 | 2.23559 |
| H | 2.89219  | -2.91615 | 1.39193 |
| C | -0.16263 | -2.2101  | 3.6737  |
| H | 0.70981  | -0.23575 | 3.94173 |
| C | -0.02346 | -3.45532 | 3.05099 |
| H | 1.21431  | -4.66858 | 1.75834 |
| H | -1.02876 | -2.0116  | 4.30808 |
| H | -0.77391 | -4.23433 | 3.20393 |
| H | 3.92538  | 0.97154  | 1.06971 |

Optimized reductive elimination transition structure of the active catalyst system (MeCu • BIFOP-H • chalcone) of the reaction pathway (B3LYP-D3(BJ)/def2-SVP) **TS-6 (R)**

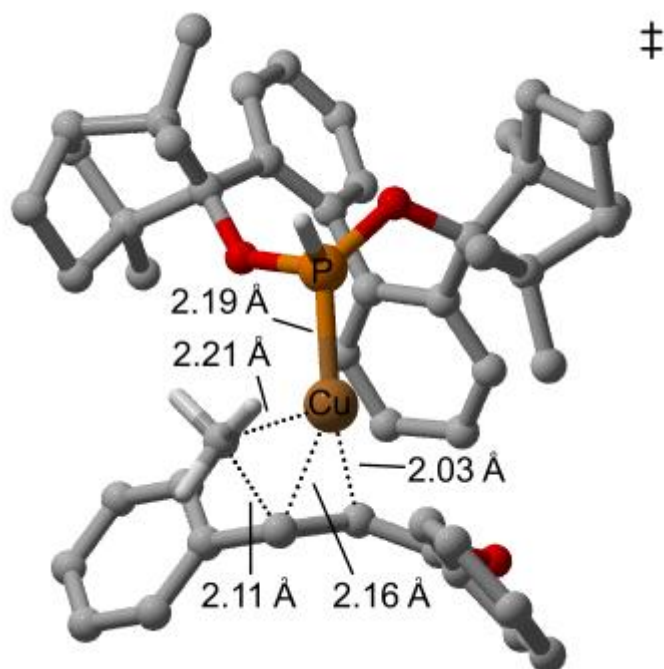

Imaginary frequency:  $-382.66 \text{ cm}^{-1}$

Energy: -4068.822935

Energy (M06-2X-D3/def2-TZVP//B3LYP-D3(BJ)/def2-SVP): -4070.161142

0 1

|    |          |          |          |
|----|----------|----------|----------|
| Cu | -1.44772 | -0.60202 | -0.46436 |
| C  | -1.71624 | -2.32271 | -1.82928 |
| H  | -2.32463 | -3.20348 | -2.05613 |
| H  | -1.87098 | -1.58625 | -2.63759 |
| H  | -0.66234 | -2.63097 | -1.78374 |
| C  | -2.78837 | -1.14828 | 0.96257  |
| H  | -2.20103 | -1.23191 | 1.87825  |
| C  | -2.71044 | -2.28284 | 0.03098  |
| C  | -3.888   | -0.21865 | 1.09544  |
| O  | -4.06348 | 0.44531  | 2.12483  |
| H  | -3.64602 | -2.50561 | -0.48513 |
| C  | -4.87032 | -0.00963 | -0.03979 |
| C  | -6.18175 | 0.36027  | 0.29827  |
| C  | -4.52484 | -0.07849 | -1.39669 |
| C  | -7.12839 | 0.62039  | -0.69189 |
| H  | -6.42814 | 0.45098  | 1.35752  |
| C  | -5.46448 | 0.19889  | -2.39317 |
| H  | -3.5032  | -0.32501 | -1.68926 |
| C  | -6.77305 | 0.54016  | -2.04334 |
| H  | -8.14819 | 0.89657  | -0.41162 |
| H  | -5.17071 | 0.15201  | -3.44493 |
| H  | -7.51202 | 0.75153  | -2.8203  |
| C  | -2.0158  | -3.49253 | 0.56437  |
| C  | -0.71246 | -3.40421 | 1.08442  |
| C  | -2.65523 | -4.73868 | 0.5656   |

|   |          |          |          |
|---|----------|----------|----------|
| C | -0.07353 | -4.53031 | 1.59946  |
| H | -0.18985 | -2.44449 | 1.06379  |
| C | -2.0167  | -5.86924 | 1.0854   |
| H | -3.66753 | -4.82234 | 0.16145  |
| C | -0.7248  | -5.76945 | 1.60513  |
| H | 0.9418   | -4.44259 | 1.99231  |
| H | -2.53346 | -6.83219 | 1.08255  |
| H | -0.22369 | -6.65253 | 2.00862  |
| C | -1.20691 | 0.90484  | 3.30791  |
| C | -0.94505 | 1.81269  | 2.28317  |
| C | -0.33682 | -0.15912 | 3.50605  |
| C | 0.15217  | 1.70958  | 1.41736  |
| C | 0.82921  | -0.21946 | 2.74579  |
| C | 1.13282  | 0.70289  | 1.72869  |
| O | 1.0112   | 1.82002  | -0.7929  |
| O | 1.52023  | -0.77266 | -0.72901 |
| C | 2.62311  | 0.75754  | 1.41144  |
| C | 3.28591  | 1.35553  | 2.50799  |
| P | 0.4095   | 0.33234  | -1.16502 |
| C | 3.42527  | 0.25801  | 0.3423   |
| C | 4.65563  | 1.57557  | 2.56367  |
| C | 4.80554  | 0.53409  | 0.41117  |
| C | 5.42347  | 1.18726  | 1.47284  |
| H | 5.45186  | 0.19569  | -0.38358 |
| H | 6.50225  | 1.35728  | 1.44846  |
| H | 5.10314  | 2.05288  | 3.43806  |
| H | 2.67131  | 1.67893  | 3.34824  |
| H | 1.57746  | -0.97284 | 2.98889  |
| H | -0.53468 | -0.91624 | 4.26793  |

|   |          |         |          |
|---|----------|---------|----------|
| H | -2.12481 | 1.00605 | 3.88567  |
| H | -1.66412 | 2.60631 | 2.14025  |
| H | 0.59607  | 0.4515  | -2.55624 |
| C | 0.26544  | 2.6148  | 0.16529  |
| C | 1.00951  | 3.98209 | 0.42319  |
| C | -1.10626 | 3.16043 | -0.58818 |
| C | 1.40319  | 4.60188 | -0.9488  |
| C | -0.18504 | 4.86572 | 0.83833  |
| C | -0.94653 | 4.70915 | -0.47728 |
| C | 0.09404  | 5.23983 | -1.4753  |
| H | 1.81602  | 3.83769 | -1.61967 |
| H | 2.18833  | 5.35652 | -0.79376 |
| H | -0.71685 | 4.48784 | 1.72238  |
| H | 0.12567  | 5.90218 | 1.04276  |
| H | -1.92006 | 5.21664 | -0.54123 |
| H | -0.12633 | 4.99377 | -2.52175 |
| H | 0.13503  | 6.3382  | -1.4098  |
| C | 2.1681   | 3.99128 | 1.39921  |
| H | 1.88449  | 3.57604 | 2.37431  |
| H | 3.02854  | 3.42942 | 1.01675  |
| H | 2.49175  | 5.03236 | 1.55906  |
| C | -2.47203 | 2.75428 | -0.01128 |
| H | -2.51846 | 1.68539 | 0.22314  |
| H | -2.76202 | 3.31398 | 0.88545  |
| H | -3.24583 | 2.95927 | -0.76614 |
| C | -1.16104 | 2.72616 | -2.06614 |
| H | -1.51246 | 1.68589 | -2.15846 |
| H | -1.90913 | 3.34394 | -2.58502 |
| H | -0.21041 | 2.82207 | -2.60036 |

|   |         |          |          |
|---|---------|----------|----------|
| C | 2.95331 | -0.78327 | -0.69871 |
| C | 3.35597 | -2.23939 | -0.17813 |
| C | 3.60025 | -0.80599 | -2.20116 |
| C | 2.5641  | -3.28918 | -1.00999 |
| C | 4.76518 | -2.40542 | -0.77515 |
| C | 4.32627 | -2.19477 | -2.22699 |
| C | 3.31238 | -3.34558 | -2.3665  |
| H | 1.50748 | -3.01564 | -1.10182 |
| H | 2.59565 | -4.25708 | -0.48908 |
| H | 5.504   | -1.69173 | -0.3974  |
| H | 5.15917 | -3.41784 | -0.5946  |
| H | 5.12267 | -2.21278 | -2.98603 |
| H | 2.64954 | -3.25941 | -3.23576 |
| H | 3.85747 | -4.29525 | -2.47888 |
| C | 3.22198 | -2.47037 | 1.31621  |
| H | 3.83    | -1.77335 | 1.90865  |
| H | 2.17465 | -2.36863 | 1.62866  |
| H | 3.54473 | -3.49495 | 1.5588   |
| C | 2.55403 | -0.75783 | -3.32967 |
| H | 1.66407 | -1.36764 | -3.14163 |
| H | 2.23875 | 0.27298  | -3.53867 |
| H | 3.02673 | -1.13581 | -4.24946 |
| C | 4.59317 | 0.32212  | -2.54897 |
| H | 5.60608 | 0.1567   | -2.16229 |
| H | 4.69354 | 0.3763   | -3.64382 |
| H | 4.24075 | 1.30163  | -2.19473 |

Optimized reductive elimination transition structure of the active catalyst system (MeCu • BIFOP-H • chalcone) of the reaction pathway (B3LYP-D3(BJ)/def2-SVP)**TS-4 (S)**

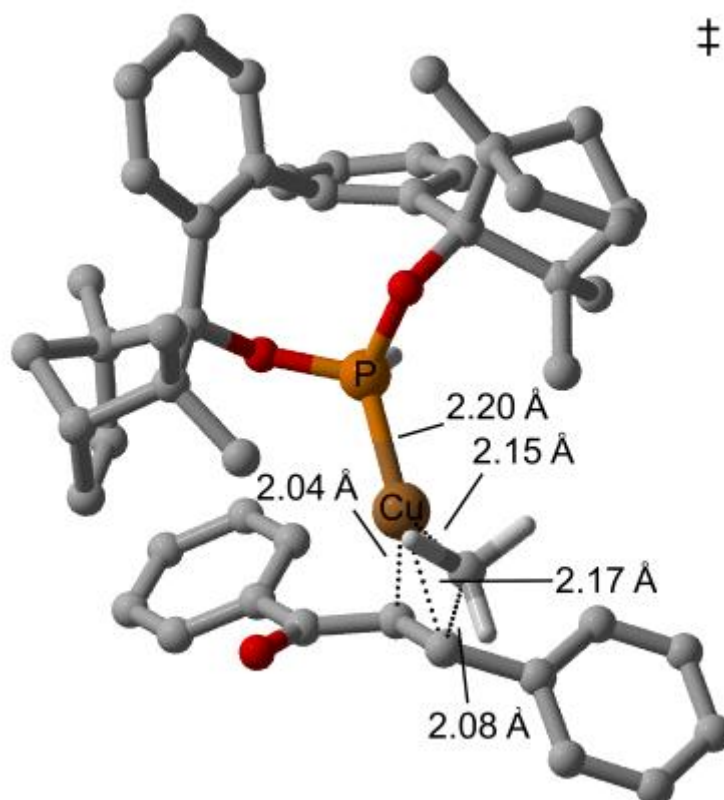

Imaginary frequency:  $-378.86 \text{ cm}^{-1}$

Energy: -4068.823932

Energy (M06-2X-D3/def2-TZVP//B3LYP-D3(BJ)/def2-SVP): -4070.162638

0 1

|    |          |          |          |
|----|----------|----------|----------|
| Cu | -2.01044 | -0.0561  | -0.63227 |
| C  | -3.17872 | 0.71172  | -2.27062 |
| C  | -3.50775 | -1.04389 | 0.34522  |
| H  | -3.65645 | -0.64771 | 1.34971  |
| C  | -4.15369 | -0.38333 | -0.79291 |
| C  | -2.96953 | -2.36356 | 0.16348  |
| O  | -2.96519 | -2.95027 | -0.93797 |
| C  | -2.34536 | -3.05288 | 1.35021  |
| C  | -1.77322 | -2.35091 | 2.42271  |
| C  | -2.25703 | -4.45241 | 1.33346  |



|   |          |          |          |
|---|----------|----------|----------|
| C | -1.12338 | -3.03313 | 3.45304  |
| H | -1.80443 | -1.25998 | 2.43076  |
| C | -1.62332 | -5.13707 | 2.37017  |
| H | -2.68195 | -4.98075 | 0.47842  |
| C | -1.04882 | -4.42919 | 3.43122  |
| H | -0.66358 | -2.47237 | 4.27076  |
| H | -1.56481 | -6.22832 | 2.3471   |
| H | -0.53802 | -4.96367 | 4.23609  |
| H | -2.39172 | 0.28487  | -2.91448 |
| H | -4.12101 | 0.65637  | -2.82063 |
| H | -2.97693 | 1.76715  | -2.03718 |
| H | -4.46927 | -1.10955 | -1.54658 |
| C | -5.1734  | 0.65612  | -0.47283 |
| C | -4.90334 | 1.69752  | 0.43055  |
| C | -6.43997 | 0.60557  | -1.07222 |
| C | -5.87232 | 2.65459  | 0.73028  |
| H | -3.91788 | 1.76208  | 0.89673  |
| C | -7.41444 | 1.56118  | -0.77158 |
| H | -6.66396 | -0.19887 | -1.7776  |
| C | -7.13465 | 2.59002  | 0.1305   |
| H | -5.64184 | 3.4576   | 1.43502  |
| H | -8.39747 | 1.49993  | -1.24502 |
| H | -7.89446 | 3.33934  | 0.36479  |
| C | 2.67512  | 1.9421   | 3.87578  |
| C | 2.19459  | 2.56542  | 2.72474  |
| C | 3.1649   | 0.64392  | 3.78827  |
| C | 2.17298  | 1.95621  | 1.4596   |
| C | 3.28725  | 0.06797  | 2.52612  |
| C | 2.86401  | 0.70372  | 1.34458  |

|   |         |          |          |
|---|---------|----------|----------|
| O | 0.97849 | 1.50418  | -0.55949 |
| O | 1.04541 | -1.04023 | 0.07378  |
| C | 3.58399 | 0.16246  | 0.11918  |
| C | 4.91406 | 0.64508  | 0.14749  |
| P | 0.06573 | 0.25607  | 0.03803  |
| C | 3.23929 | -0.7975  | -0.87078 |
| C | 5.88583 | 0.29107  | -0.77681 |
| C | 4.25    | -1.13448 | -1.79548 |
| C | 5.53586 | -0.60759 | -1.77858 |
| H | 4.04329 | -1.8685  | -2.5584  |
| H | 6.25913 | -0.92439 | -2.53345 |
| H | 6.89357 | 0.70607  | -0.70639 |
| H | 5.181   | 1.33731  | 0.94644  |
| H | 3.79979 | -0.88829 | 2.42839  |
| H | 3.51013 | 0.10662  | 4.67443  |
| H | 2.64472 | 2.47165  | 4.83059  |
| H | 1.80985 | 3.57004  | 2.83151  |
| H | 0.12881 | 0.53881  | 1.42889  |
| C | 1.38968 | 2.60308  | 0.28653  |
| C | 2.23078 | 3.63463  | -0.56201 |
| C | 0.05461 | 3.52678  | 0.6316   |
| C | 1.46022 | 3.94174  | -1.87925 |
| C | 1.98955 | 4.92315  | 0.25054  |
| C | 0.47079 | 4.92528  | 0.07162  |
| C | 0.36991 | 4.95935  | -1.46163 |
| H | 1.05205 | 3.02237  | -2.31726 |
| H | 2.15567 | 4.3719   | -2.61464 |
| H | 2.33237 | 4.85199  | 1.2917   |
| H | 2.48117 | 5.79455  | -0.20933 |

|   |          |          |          |
|---|----------|----------|----------|
| H | -0.07902 | 5.7382   | 0.56864  |
| H | -0.62771 | 4.72018  | -1.85006 |
| H | 0.61495  | 5.97156  | -1.81861 |
| C | 3.68706  | 3.30868  | -0.8208  |
| H | 4.2432   | 3.16025  | 0.11279  |
| H | 3.80048  | 2.40951  | -1.439   |
| H | 4.15351  | 4.14956  | -1.35856 |
| C | -0.3954  | 3.68165  | 2.09819  |
| H | 0.2072   | 4.39424  | 2.67417  |
| H | -1.42084 | 4.08275  | 2.09656  |
| H | -0.41544 | 2.72577  | 2.64009  |
| C | -1.19855 | 3.01044  | -0.09428 |
| H | -1.02267 | 2.7047   | -1.12866 |
| H | -1.64489 | 2.15691  | 0.44074  |
| H | -1.96591 | 3.79913  | -0.09425 |
| C | 1.94962  | -1.6453  | -0.86478 |
| C | 1.25287  | -2.02798 | -2.29331 |
| C | 1.30847  | -3.59032 | -2.2787  |
| H | 1.2163   | -3.9981  | -3.29651 |
| C | 1.93729  | -1.48508 | -3.56589 |
| H | 1.22309  | -1.55938 | -4.39963 |
| H | 2.22264  | -0.42834 | -3.46309 |
| H | 2.82199  | -2.0545  | -3.87458 |
| C | -0.19729 | -1.55345 | -2.41494 |
| H | -0.24254 | -0.46889 | -2.59027 |
| H | -0.66117 | -2.04233 | -3.28485 |
| H | -0.82173 | -1.8175  | -1.55637 |
| C | 2.6203   | -3.89083 | -1.54464 |
| H | 2.74053  | -4.9618  | -1.31808 |

|   |          |          |          |
|---|----------|----------|----------|
| H | 3.53251  | -3.55929 | -2.05178 |
| C | 2.25373  | -3.09661 | -0.27641 |
| C | 3.23763  | -3.14399 | 0.87925  |
| H | 2.82067  | -2.62799 | 1.75602  |
| H | 3.41566  | -4.19196 | 1.16703  |
| H | 4.20799  | -2.69024 | 0.63184  |
| C | 0.89679  | -3.7598  | 0.08396  |
| H | 1.08734  | -4.63272 | 0.72462  |
| H | 0.25533  | -3.08445 | 0.65529  |
| C | 0.29058  | -4.17543 | -1.28086 |
| H | 0.27449  | -5.27134 | -1.38616 |
| H | -0.74201 | -3.83185 | -1.41678 |

Optimized reductive elimination transition structure of the active catalyst system (MeCu • BIFOP-H • chalcone) of the reaction pathway (B3LYP-D3(BJ)/def2-SVP)**TS-4.1 (S)**

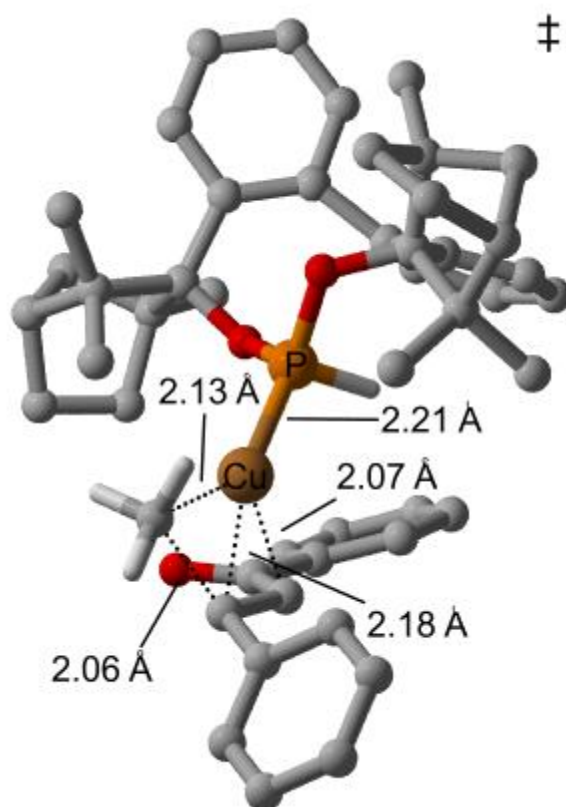

Imaginary frequency: -399.72 cm<sup>-1</sup>

Energy: -4068.823399

Energy (M06-2X-D3/def2-TZVP//B3LYP-D3(BJ)/def2-SVP): -4070.161513

0 1

|    |          |          |          |
|----|----------|----------|----------|
| Cu | -2.0985  | -0.41352 | -0.74468 |
| C  | -3.45193 | -0.76899 | -2.34701 |
| C  | -3.32969 | -1.06584 | 0.78953  |
| H  | -3.5852  | -0.28603 | 1.50558  |
| C  | -4.12221 | -1.17132 | -0.44253 |
| C  | -2.38341 | -2.08768 | 1.1212   |
| O  | -2.15087 | -3.06201 | 0.36816  |
| C  | -1.55649 | -1.93506 | 2.37686  |
| C  | -1.39689 | -0.71208 | 3.05107  |
| C  | -0.83419 | -3.04853 | 2.83105  |
| C  | -0.51739 | -0.59912 | 4.12874  |
| H  | -1.93833 | 0.17173  | 2.71068  |
| C  | 0.03621  | -2.94206 | 3.91637  |
| H  | -0.9629  | -3.98965 | 2.29544  |
| C  | 0.20616  | -1.71375 | 4.56276  |
| H  | -0.38105 | 0.36746  | 4.61887  |
| H  | 0.59408  | -3.81921 | 4.25427  |
| H  | 0.90271  | -1.62308 | 5.39991  |
| H  | -2.8275  | -1.56569 | -2.77507 |
| H  | -4.48456 | -0.90564 | -2.67479 |
| H  | -3.12877 | 0.227    | -2.70284 |
| H  | -4.28049 | -2.21121 | -0.74359 |
| C  | -5.35589 | -0.33027 | -0.46394 |
| C  | -5.29024 | 1.06323  | -0.30336 |

|   |          |          |          |
|---|----------|----------|----------|
| C | -6.61366 | -0.92738 | -0.62495 |
| C | -6.45067 | 1.83686  | -0.29487 |
| H | -4.31556 | 1.54428  | -0.19634 |
| C | -7.77841 | -0.15446 | -0.61477 |
| H | -6.67843 | -2.01111 | -0.75134 |
| C | -7.70183 | 1.23018  | -0.4491  |
| H | -6.37956 | 2.92054  | -0.1717  |
| H | -8.75058 | -0.63856 | -0.73654 |
| H | -8.61137 | 1.83548  | -0.44378 |
| C | 2.1591   | 2.18497  | 3.64204  |
| C | 1.69689  | 2.70307  | 2.43255  |
| C | 2.77906  | 0.94132  | 3.65251  |
| C | 1.82019  | 2.03811  | 1.20211  |
| C | 3.04048  | 0.32267  | 2.4329   |
| C | 2.63456  | 0.85543  | 1.19671  |
| O | 0.80302  | 1.37678  | -0.86049 |
| O | 1.0542   | -1.11655 | -0.05163 |
| C | 3.46305  | 0.32448  | 0.03778  |
| C | 4.74377  | 0.92127  | 0.10305  |
| P | -0.01988 | 0.09388  | -0.20505 |
| C | 3.24351  | -0.69052 | -0.93457 |
| C | 5.7747   | 0.63908  | -0.78182 |
| C | 4.3036   | -0.93618 | -1.83164 |
| C | 5.53521  | -0.29244 | -1.78559 |
| H | 4.1839   | -1.68616 | -2.5978  |
| H | 6.30409  | -0.54515 | -2.51929 |
| H | 6.73964  | 1.14142  | -0.68534 |
| H | 4.91845  | 1.65203  | 0.89327  |
| H | 3.64246  | -0.58457 | 2.41849  |

|   |          |         |          |
|---|----------|---------|----------|
| H | 3.11052  | 0.47966 | 4.58501  |
| H | 2.01127  | 2.751   | 4.56447  |
| H | 1.20674  | 3.66613 | 2.46363  |
| H | -0.0143  | 0.47125 | 1.15793  |
| C | 1.05585  | 2.54867 | -0.05101 |
| C | 1.85107  | 3.61855 | -0.89415 |
| C | -0.38155 | 3.35182 | 0.16172  |
| C | 1.14169  | 3.80059 | -2.26773 |
| C | 1.44207  | 4.9095  | -0.15548 |
| C | -0.05605 | 4.76334 | -0.42656 |
| C | -0.05725 | 4.7326  | -1.96349 |
| H | 0.84388  | 2.83049 | -2.68499 |
| H | 1.84182  | 4.26025 | -2.98048 |
| H | 1.72255  | 4.91125 | 0.90629  |
| H | 1.88068  | 5.8047  | -0.62319 |
| H | -0.70862 | 5.53903 | 0.00101  |
| H | -1.00246 | 4.39309 | -2.40464 |
| H | 0.12394  | 5.74886 | -2.34624 |
| C | 3.34426  | 3.41913 | -1.05088 |
| H | 3.85112  | 3.3571  | -0.08026 |
| H | 3.5763   | 2.51156 | -1.62196 |
| H | 3.76673  | 4.27855 | -1.59572 |
| C | -0.94868 | 3.5062  | 1.58723  |
| H | -0.46501 | 4.29658 | 2.17347  |
| H | -2.00801 | 3.79453 | 1.50334  |
| H | -0.90534 | 2.57094 | 2.16287  |
| C | -1.53101 | 2.69752 | -0.62889 |
| H | -1.25278 | 2.35298 | -1.62905 |
| H | -1.95089 | 1.84134 | -0.07471 |

|   |          |          |          |
|---|----------|----------|----------|
| H | -2.35101 | 3.42464  | -0.72909 |
| C | 2.04665  | -1.66849 | -0.92464 |
| C | 1.45297  | -2.19655 | -2.3501  |
| C | 1.77532  | -3.73071 | -2.29868 |
| H | 1.82899  | -4.16022 | -3.31047 |
| C | 2.04424  | -1.55838 | -3.62434 |
| H | 1.35359  | -1.74501 | -4.46075 |
| H | 2.15895  | -0.46947 | -3.52125 |
| H | 3.00924  | -1.98011 | -3.92972 |
| C | -0.06133 | -1.98949 | -2.48375 |
| H | -0.29784 | -0.94509 | -2.73136 |
| H | -0.4232  | -2.60566 | -3.32179 |
| H | -0.63124 | -2.28147 | -1.59522 |
| C | 3.05475  | -3.81477 | -1.45534 |
| H | 3.30595  | -4.85111 | -1.1803  |
| H | 3.94974  | -3.36919 | -1.89987 |
| C | 2.47597  | -3.04605 | -0.25321 |
| C | 3.34722  | -2.92537 | 0.98406  |
| H | 2.78701  | -2.43809 | 1.79521  |
| H | 3.63118  | -3.93031 | 1.33395  |
| H | 4.27053  | -2.35782 | 0.79838  |
| C | 1.18322  | -3.86992 | 0.01887  |
| H | 1.41016  | -4.65786 | 0.75252  |
| H | 0.38299  | -3.25707 | 0.44157  |
| C | 0.79918  | -4.46109 | -1.35932 |
| H | 0.99834  | -5.54309 | -1.40365 |
| H | -0.2618  | -4.32061 | -1.59431 |



Optimized reductive elimination transition structure of the active catalyst system (MeCu • BIFOP-H • chalcone) of the reaction pathway (B3LYP-D3(BJ)/def2-SVP)**TS-8.4 (S)**

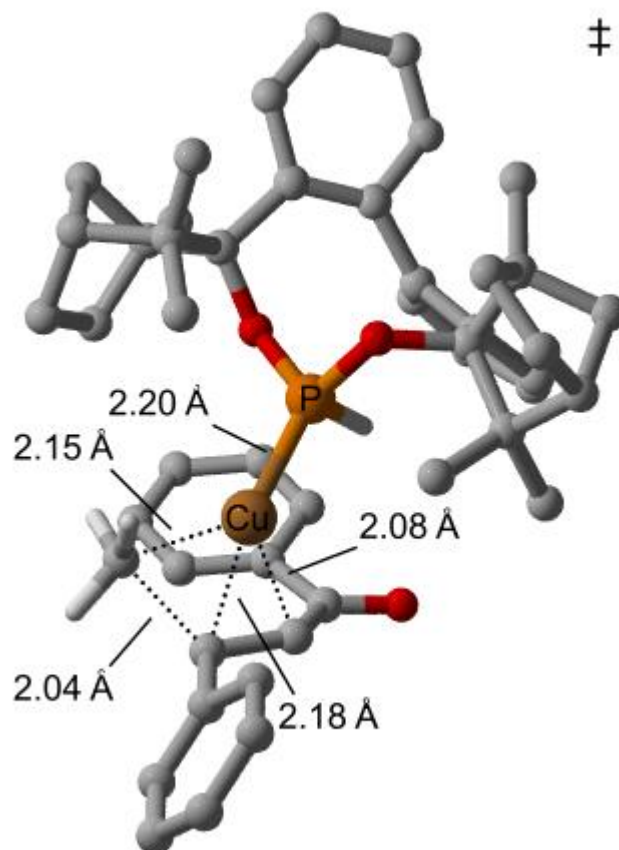

Imaginary frequency:  $-420.86 \text{ cm}^{-1}$

Energy:  $-4068.812788$

Energy (M06-2X-D3/def2-TZVP//B3LYP-D3(BJ)/def2-SVP):  $-4070.148164$

0 1

|    |          |          |          |
|----|----------|----------|----------|
| Cu | -2.13825 | -0.37671 | -0.232   |
| C  | -3.37955 | -1.86615 | -1.15883 |
| C  | -3.5018  | 0.18885  | 1.22879  |
| H  | -3.83186 | 1.22602  | 1.13696  |
| C  | -4.20022 | -0.77957 | 0.35872  |
| C  | -2.55826 | 0.02612  | 2.30802  |
| O  | -2.18713 | 1.00633  | 2.97838  |

|   |          |          |          |
|---|----------|----------|----------|
| C | -1.83478 | -1.29005 | 2.56931  |
| C | -2.2581  | -2.56895 | 2.16518  |
| C | -0.60984 | -1.19036 | 3.25675  |
| C | -1.47555 | -3.69868 | 2.42002  |
| H | -3.21197 | -2.70797 | 1.66422  |
| C | 0.18253  | -2.31196 | 3.49026  |
| H | -0.30484 | -0.20005 | 3.59538  |
| C | -0.24655 | -3.57479 | 3.07083  |
| H | -1.82835 | -4.68181 | 2.09889  |
| H | 1.14095  | -2.199   | 4.00224  |
| H | 0.37354  | -4.45668 | 3.24848  |
| H | -2.6469  | -2.64263 | -0.88875 |
| H | -4.35693 | -2.33293 | -1.30281 |
| H | -3.10718 | -1.3805  | -2.11223 |
| H | -4.51349 | -1.70889 | 0.83768  |
| C | -5.32573 | -0.16682 | -0.41821 |
| C | -5.11603 | 0.95202  | -1.24051 |
| C | -6.6178  | -0.70151 | -0.33264 |
| C | -6.17108 | 1.5244   | -1.95019 |
| H | -4.11237 | 1.37651  | -1.32524 |
| C | -7.67819 | -0.12845 | -1.0409  |
| H | -6.79679 | -1.57244 | 0.30365  |
| C | -7.45898 | 0.9866   | -1.85221 |
| H | -5.98769 | 2.39419  | -2.58582 |
| H | -8.68025 | -0.55591 | -0.95558 |
| H | -8.28601 | 1.43453  | -2.40804 |
| C | 2.03716  | 1.96613  | 3.74387  |
| C | 1.71056  | 2.54669  | 2.51745  |
| C | 2.57689  | 0.68591  | 3.76761  |

|   |          |          |          |
|---|----------|----------|----------|
| C | 1.90121  | 1.9114   | 1.28216  |
| C | 2.91083  | 0.08761  | 2.55419  |
| C | 2.65347  | 0.68624  | 1.30881  |
| O | 0.83663  | 1.25229  | -0.74871 |
| O | 1.07155  | -1.2075  | -0.05017 |
| C | 3.54164  | 0.1066   | 0.22207  |
| C | 4.85603  | 0.5987   | 0.42149  |
| P | 0.01425  | 0.02257  | -0.00994 |
| C | 3.34244  | -0.89512 | -0.76182 |
| C | 5.95243  | 0.19884  | -0.32501 |
| C | 4.484    | -1.29111 | -1.49382 |
| C | 5.75504  | -0.76473 | -1.31027 |
| H | 4.39148  | -2.07267 | -2.23304 |
| H | 6.58442  | -1.12818 | -1.92129 |
| H | 6.93981  | 0.62268  | -0.12959 |
| H | 5.00063  | 1.33604  | 1.21201  |
| H | 3.44741  | -0.86295 | 2.5548   |
| H | 2.78825  | 0.17745  | 4.71099  |
| H | 1.83085  | 2.50904  | 4.66843  |
| H | 1.25501  | 3.52581  | 2.53927  |
| H | 0.15637  | 0.3729   | 1.34765  |
| C | 1.20129  | 2.4446   | -0.00285 |
| C | 2.11319  | 3.37833  | -0.88631 |
| C | -0.15738 | 3.38788  | 0.12037  |
| C | 1.45354  | 3.56045  | -2.2845  |
| C | 1.81793  | 4.73495  | -0.21271 |
| C | 0.32159  | 4.72885  | -0.52563 |
| C | 0.35532  | 4.62789  | -2.05808 |
| H | 1.06102  | 2.60668  | -2.66005 |

|   |          |          |          |
|---|----------|----------|----------|
| H | 2.21219  | 3.90324  | -3.00333 |
| H | 2.06154  | 4.74468  | 0.8593   |
| H | 2.36296  | 5.56107  | -0.69568 |
| H | -0.25852 | 5.58486  | -0.1517  |
| H | -0.61044 | 4.36974  | -2.50978 |
| H | 0.6555   | 5.59919  | -2.48137 |
| C | 3.58524  | 3.039    | -1.00159 |
| H | 4.06954  | 2.98395  | -0.01968 |
| H | 3.74899  | 2.0872   | -1.52259 |
| H | 4.08961  | 3.83011  | -1.57925 |
| C | -0.76545 | 3.68217  | 1.50587  |
| H | -0.20304 | 4.42994  | 2.08002  |
| H | -1.7615  | 4.12141  | 1.34017  |
| H | -0.9244  | 2.78323  | 2.11809  |
| C | -1.32673 | 2.78444  | -0.68199 |
| H | -1.04618 | 2.39046  | -1.66387 |
| H | -1.81275 | 1.97936  | -0.10964 |
| H | -2.09284 | 3.56128  | -0.82575 |
| C | 2.0377   | -1.69051 | -0.98661 |
| C | 1.50243  | -1.8021  | -2.52399 |
| C | 1.4014   | -3.34913 | -2.7192  |
| H | 1.36353  | -3.61359 | -3.78658 |
| C | 2.43656  | -1.20288 | -3.59463 |
| H | 1.89125  | -1.16821 | -4.54997 |
| H | 2.73655  | -0.17663 | -3.34069 |
| H | 3.3442   | -1.78821 | -3.77645 |
| C | 0.15032  | -1.12709 | -2.77683 |
| H | 0.23945  | -0.03213 | -2.74217 |
| H | -0.1979  | -1.39927 | -3.78547 |

|   |          |          |          |
|---|----------|----------|----------|
| H | -0.62747 | -1.43164 | -2.0743  |
| C | 2.60419  | -3.88819 | -1.93375 |
| H | 2.59471  | -4.98651 | -1.85097 |
| H | 3.5822   | -3.60564 | -2.33399 |
| C | 2.20512  | -3.22785 | -0.59794 |
| C | 3.07494  | -3.47065 | 0.62424  |
| H | 2.65134  | -2.94722 | 1.49527  |
| H | 3.10686  | -4.54596 | 0.86053  |
| H | 4.10699  | -3.12143 | 0.4809   |
| C | 0.77843  | -3.82807 | -0.44022 |
| H | 0.87107  | -4.81833 | 0.03049  |
| H | 0.14689  | -3.22166 | 0.21339  |
| C | 0.24578  | -3.94417 | -1.89254 |
| H | 0.09251  | -4.99564 | -2.17964 |
| H | -0.71382 | -3.43473 | -2.04569 |

Optimized reductive elimination transition structure of the active catalyst system (MeCu • BIFOP-H • chalcone) of the reaction pathway (B3LYP-D3(BJ)/def2-SVP)**TS-8 (S)**

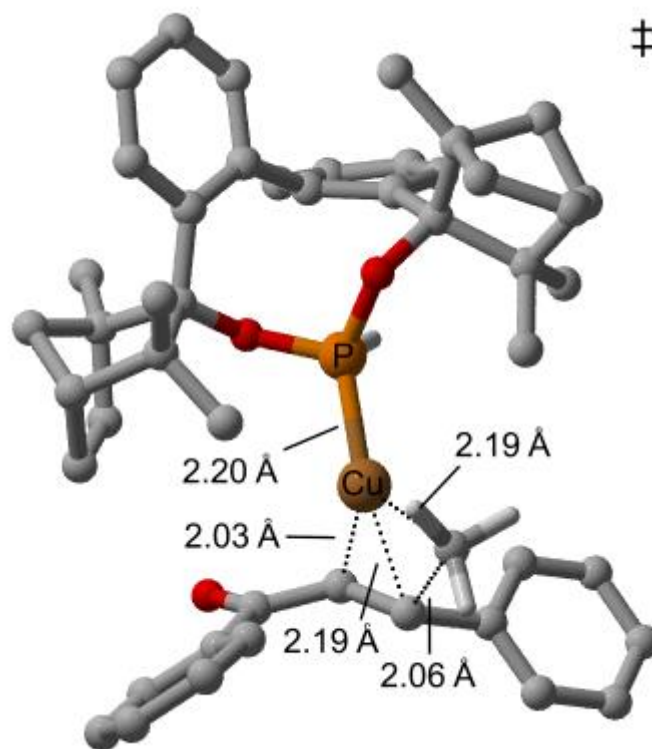

Imaginary frequency:  $-405.75 \text{ cm}^{-1}$

Energy:  $-4068.810051$

Energy (M06-2X-D3/def2-TZVP//B3LYP-D3(BJ)/def2-SVP):  $-4070.152390$

0 1

|    |          |          |          |
|----|----------|----------|----------|
| Cu | -1.78352 | 0.59823  | -0.21084 |
| C  | -2.87854 | 1.73685  | -1.72867 |
| C  | -3.33424 | 0.42611  | 1.09561  |
| H  | -2.96735 | 0.86343  | 2.02785  |
| C  | -3.82577 | 1.35343  | 0.06516  |
| C  | -3.68936 | -0.967   | 1.26527  |
| O  | -3.43066 | -1.57128 | 2.31338  |
| C  | -4.396   | -1.7508  | 0.17197  |
| C  | -4.31213 | -1.48115 | -1.20278 |
| C  | -5.12631 | -2.87888 | 0.58421  |
| C  | -4.9404  | -2.31061 | -2.13708 |

|   |          |          |          |
|---|----------|----------|----------|
| H | -3.7235  | -0.64265 | -1.56748 |
| C | -5.76811 | -3.6978  | -0.34232 |
| H | -5.15167 | -3.09727 | 1.65275  |
| C | -5.67638 | -3.4176  | -1.71072 |
| H | -4.84848 | -2.08972 | -3.20364 |
| H | -6.33653 | -4.56636 | 0.00016  |
| H | -6.1714  | -4.06338 | -2.44032 |
| H | -2.30793 | 1.02623  | -2.35867 |
| H | -3.85395 | 1.87338  | -2.20497 |
| H | -2.35807 | 2.70026  | -1.68447 |
| H | -4.70338 | 0.98945  | -0.47026 |
| C | -3.96247 | 2.7847   | 0.47358  |
| C | -2.94969 | 3.44151  | 1.19372  |
| C | -5.11074 | 3.50967  | 0.12786  |
| C | -3.08345 | 4.78014  | 1.55807  |
| H | -2.04503 | 2.89473  | 1.46954  |
| C | -5.25065 | 4.85102  | 0.49619  |
| H | -5.90722 | 3.01391  | -0.43336 |
| C | -4.2371  | 5.49238  | 1.2109   |
| H | -2.28333 | 5.27165  | 2.11724  |
| H | -6.15735 | 5.39609  | 0.22236  |
| H | -4.34353 | 6.54128  | 1.49739  |
| C | 3.84483  | 2.02488  | 3.19132  |
| C | 3.54574  | 2.31119  | 1.85947  |
| C | 3.72841  | 0.71615  | 3.64599  |
| C | 3.131    | 1.34472  | 0.92913  |
| C | 3.45983  | -0.28452 | 2.71508  |
| C | 3.22148  | -0.02381 | 1.35358  |
| O | 1.59449  | 0.73767  | -0.79908 |

|   |         |          |          |
|---|---------|----------|----------|
| O | 0.72796 | -1.15675 | 0.7521   |
| C | 3.51421 | -1.23313 | 0.48226  |
| C | 4.91848 | -1.40343 | 0.42901  |
| P | 0.35318 | 0.33317  | 0.22417  |
| C | 2.69308 | -2.22685 | -0.11358 |
| C | 5.54567 | -2.44446 | -0.23879 |
| C | 3.36287 | -3.26527 | -0.79506 |
| C | 4.74487 | -3.38271 | -0.88124 |
| H | 2.78683 | -4.04583 | -1.2669  |
| H | 5.18225 | -4.22099 | -1.42833 |
| H | 6.6353  | -2.51678 | -0.25233 |
| H | 5.53479 | -0.66274 | 0.93975  |
| H | 3.50334 | -1.32769 | 3.02835  |
| H | 3.90587 | 0.46128  | 4.69314  |
| H | 4.14435 | 2.83182  | 3.86371  |
| H | 3.62945 | 3.34217  | 1.54513  |
| H | 0.73699 | 1.04149  | 1.39346  |
| C | 2.54626 | 1.76949  | -0.44617 |
| C | 3.62561 | 1.91133  | -1.58812 |
| C | 1.78717 | 3.23792  | -0.57596 |
| C | 2.89513 | 2.01222  | -2.95913 |
| C | 4.07086 | 3.37047  | -1.35933 |
| C | 2.69221 | 3.98338  | -1.61017 |
| C | 2.42188 | 3.48467  | -3.03842 |
| H | 2.07304 | 1.2878   | -3.01799 |
| H | 3.60147 | 1.76882  | -3.76618 |
| H | 4.47948 | 3.54717  | -0.35506 |
| H | 4.82694 | 3.68814  | -2.09414 |
| H | 2.61522 | 5.07531  | -1.50133 |



|   |          |          |          |
|---|----------|----------|----------|
| H | 1.37954  | 3.59591  | -3.36145 |
| H | 3.03734  | 4.06077  | -3.74659 |
| C | 4.7524   | 0.89971  | -1.62219 |
| H | 5.31257  | 0.88159  | -0.67975 |
| H | 4.38566  | -0.11399 | -1.82685 |
| H | 5.45591  | 1.17284  | -2.42491 |
| C | 1.61992  | 4.11601  | 0.68083  |
| H | 2.52976  | 4.65682  | 0.96854  |
| H | 0.86473  | 4.88551  | 0.45762  |
| H | 1.26334  | 3.54842  | 1.55186  |
| C | 0.3565   | 3.08903  | -1.12065 |
| H | 0.25613  | 2.36867  | -1.93709 |
| H | -0.34481 | 2.79394  | -0.32685 |
| H | 0.01024  | 4.06979  | -1.47989 |
| C | 1.17193  | -2.36193 | 0.11525  |
| C | 0.24644  | -2.84359 | -1.14112 |
| C | -0.34734 | -4.1945  | -0.61618 |
| H | -0.67513 | -4.83354 | -1.44986 |
| C | 0.96953  | -3.06051 | -2.48692 |
| H | 0.21436  | -3.08352 | -3.28728 |
| H | 1.6722   | -2.24509 | -2.71103 |
| H | 1.51058  | -4.01131 | -2.55421 |
| C | -0.88862 | -1.87087 | -1.47693 |
| H | -0.51322 | -0.98677 | -2.01327 |
| H | -1.60785 | -2.37456 | -2.13915 |
| H | -1.45287 | -1.55584 | -0.59055 |
| C | 0.76386  | -4.75982 | 0.27735  |
| H | 0.42911  | -5.63565 | 0.85468  |
| H | 1.68912  | -5.04201 | -0.23401 |

|   |          |          |         |
|---|----------|----------|---------|
| C | 0.86751  | -3.51175 | 1.1745  |
| C | 1.83051  | -3.57321 | 2.34705 |
| H | 1.76984  | -2.64818 | 2.93904 |
| H | 1.55772  | -4.40985 | 3.00896 |
| H | 2.8733   | -3.71667 | 2.02889 |
| C | -0.6168  | -3.37136 | 1.62635 |
| H | -0.76593 | -3.96549 | 2.53959 |
| H | -0.89204 | -2.3418  | 1.87603 |
| C | -1.43594 | -3.94537 | 0.44233 |
| H | -1.90706 | -4.90304 | 0.71045 |
| H | -2.24778 | -3.28758 | 0.11911 |

Optimized reductive elimination transition structure of the active catalyst system (MeCu • BIFOP-H • chalcone) of the reaction pathway (B3LYP-D3(BJ)/def2-SVP) **TS-2.1 (R)**

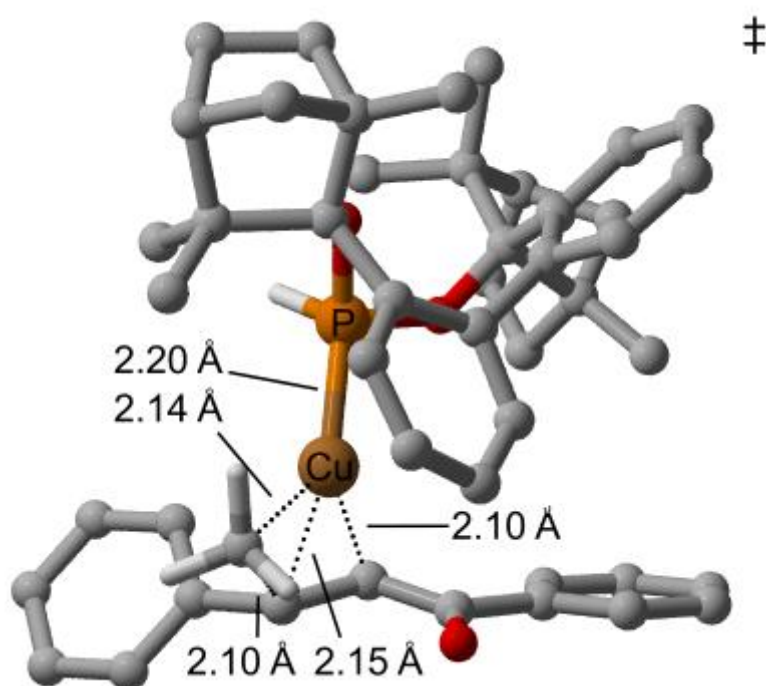

Imaginary frequency:  $-390.64 \text{ cm}^{-1}$

Energy: -4068.829003

Energy (M06-2X-D3/def2-TZVP//B3LYP-D3(BJ)/def2-SVP): -4070.164430

0 1

|    |         |          |          |
|----|---------|----------|----------|
| Cu | 1.70066 | 0.8773   | -0.41554 |
| C  | 2.72664 | 2.42134  | -1.47668 |
| H  | 1.70327 | 2.82308  | -1.39497 |
| H  | 3.42781 | 3.19881  | -1.16067 |
| H  | 2.90438 | 2.08196  | -2.5013  |
| C  | 3.33889 | -0.42485 | -0.30997 |
| H  | 3.34475 | -0.86153 | 0.687    |
| C  | 3.84412 | 0.93404  | -0.49899 |
| C  | 3.17173 | -1.23748 | -1.47997 |
| O  | 3.24232 | -0.76176 | -2.63011 |
| H  | 4.46837 | 1.02639  | -1.38937 |
| C  | 2.87926 | -2.70945 | -1.3236  |
| C  | 2.42701 | -3.4095  | -2.45359 |
| C  | 3.07594 | -3.42017 | -0.12955 |
| C  | 2.1661  | -4.77826 | -2.39218 |
| H  | 2.30496 | -2.84739 | -3.3807  |
| C  | 2.83146 | -4.79357 | -0.06933 |
| H  | 3.44261 | -2.9049  | 0.75886  |
| C  | 2.37216 | -5.47728 | -1.19854 |
| H  | 1.80846 | -5.30607 | -3.27998 |
| H  | 3.00228 | -5.33369 | 0.86532  |
| H  | 2.1774  | -6.55151 | -1.14882 |
| C  | 4.38069 | 1.64833  | 0.69432  |
| C  | 3.71236 | 1.63589  | 1.93129  |
| C  | 5.58545 | 2.36133  | 0.59903  |
| C  | 4.23129 | 2.31268  | 3.03457  |
| H  | 2.7698  | 1.09189  | 2.02643  |

|   |          |          |          |
|---|----------|----------|----------|
| C | 6.11069  | 3.03672  | 1.70346  |
| H | 6.11724  | 2.3809   | -0.35566 |
| C | 5.43511  | 3.01685  | 2.926    |
| H | 3.69323  | 2.2915   | 3.98562  |
| H | 7.05322  | 3.58142  | 1.60747  |
| H | 5.84276  | 3.547    | 3.78995  |
| C | 0.1984   | 1.61835  | -3.63979 |
| C | -0.69954 | 2.19963  | -2.73897 |
| C | 0.57057  | 0.28857  | -3.47798 |
| C | -1.27768 | 1.49046  | -1.67977 |
| C | -0.13053 | -0.48427 | -2.54851 |
| C | -1.1155  | 0.05773  | -1.70773 |
| O | -1.61334 | 1.31853  | 0.65504  |
| O | -0.39772 | -0.90454 | 0.96047  |
| C | -2.17809 | -0.93558 | -1.27193 |
| C | -2.96555 | -1.23294 | -2.41197 |
| P | -0.09305 | 0.68405  | 0.84561  |
| C | -2.49717 | -1.57878 | -0.04644 |
| C | -4.09091 | -2.04237 | -2.38229 |
| C | -3.67603 | -2.35503 | -0.04206 |
| C | -4.47232 | -2.5815  | -1.15813 |
| H | -3.98    | -2.84728 | 0.86882  |
| H | -5.36646 | -3.20225 | -1.06624 |
| H | -4.66415 | -2.22715 | -3.2932  |
| H | -2.68138 | -0.76383 | -3.35498 |
| H | 0.04059  | -1.56158 | -2.51063 |
| H | 1.36289  | -0.16337 | -4.07291 |
| H | 0.64721  | 2.23272  | -4.4229  |
| H | -0.91506 | 3.25373  | -2.85266 |

|   |          |          |          |
|---|----------|----------|----------|
| H | 0.09006  | 1.05439  | 2.20129  |
| C | -1.92504 | 2.19022  | -0.45902 |
| C | -3.49953 | 2.3764   | -0.52603 |
| C | -1.43988 | 3.71014  | -0.02413 |
| C | -4.03661 | 2.51789  | 0.92196  |
| C | -3.60483 | 3.83134  | -1.02116 |
| C | -2.80732 | 4.43851  | 0.13336  |
| C | -3.59925 | 3.9399   | 1.35425  |
| H | -3.65131 | 1.72544  | 1.57258  |
| H | -5.13302 | 2.42513  | 0.90071  |
| H | -3.15674 | 3.985    | -2.01408 |
| H | -4.65203 | 4.16953  | -1.06156 |
| H | -2.68072 | 5.53087  | 0.1147   |
| H | -3.01383 | 3.95233  | 2.28286  |
| H | -4.47074 | 4.59175  | 1.52014  |
| C | -4.3059  | 1.38358  | -1.34147 |
| H | -3.8995  | 1.25464  | -2.35295 |
| H | -4.35682 | 0.40037  | -0.86042 |
| H | -5.33725 | 1.75937  | -1.43825 |
| C | -0.60234 | 4.55995  | -0.99965 |
| H | 0.34445  | 4.08757  | -1.28375 |
| H | -1.14276 | 4.84283  | -1.91169 |
| H | -0.35042 | 5.49968  | -0.48468 |
| C | -0.62796 | 3.70051  | 1.28055  |
| H | 0.3851   | 3.30104  | 1.10801  |
| H | -0.50266 | 4.73605  | 1.63254  |
| H | -1.09499 | 3.12758  | 2.08714  |
| C | -1.55854 | -1.71507 | 1.17184  |
| C | -0.97463 | -3.20387 | 1.22204  |

|   |          |          |          |
|---|----------|----------|----------|
| C | -2.18189 | -1.55583 | 2.66348  |
| C | 0.27403  | -3.19468 | 2.14824  |
| C | -1.97182 | -3.92391 | 2.15218  |
| C | -1.82263 | -2.93257 | 3.31339  |
| C | -0.30944 | -3.05211 | 3.57907  |
| H | 0.97951  | -2.40428 | 1.87457  |
| H | 0.79879  | -4.15215 | 2.02322  |
| H | -2.98693 | -4.03265 | 1.7593   |
| H | -1.6141  | -4.93322 | 2.41006  |
| H | -2.44323 | -3.12767 | 4.20103  |
| H | 0.10911  | -2.2066  | 4.13926  |
| H | -0.1146  | -3.95387 | 4.17967  |
| C | -0.68754 | -3.81989 | -0.13639 |
| H | -1.59071 | -3.91701 | -0.7538  |
| H | 0.04617  | -3.21409 | -0.68761 |
| H | -0.24865 | -4.82    | -0.01111 |
| C | -1.56933 | -0.3975  | 3.46087  |
| H | -0.47607 | -0.39373 | 3.45026  |
| H | -1.92907 | 0.57152  | 3.08802  |
| H | -1.88655 | -0.48713 | 4.51164  |
| C | -3.70479 | -1.32515 | 2.74239  |
| H | -4.30029 | -2.23036 | 2.57517  |
| H | -3.95413 | -0.97665 | 3.75624  |
| H | -4.03959 | -0.55712 | 2.03161  |

Optimized reductive elimination transition structure of the active catalyst system (MeCu • BIFOP-H • chalcone) of the reaction pathway (B3LYP-D3(BJ)/def2-SVP)**TS-1.3 (R)**

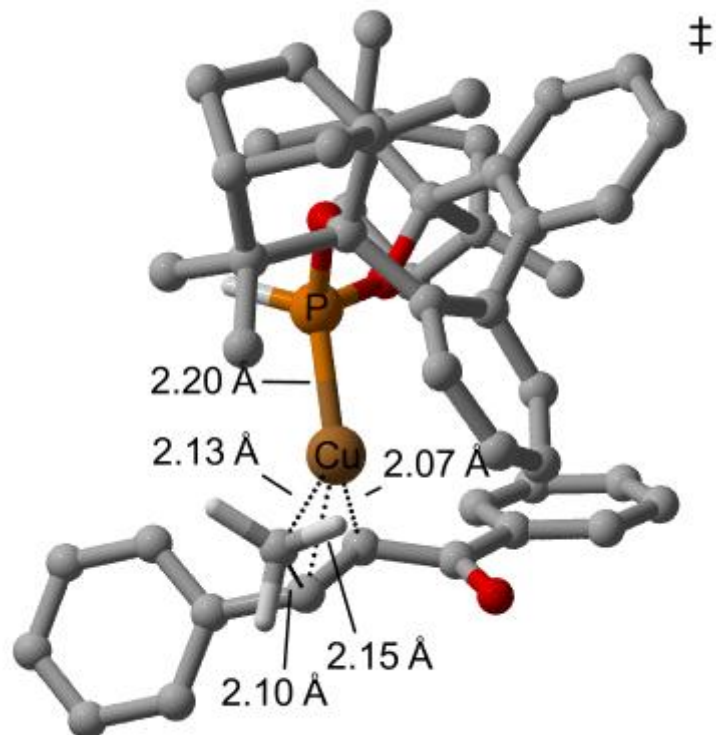

Imaginary frequency:  $-361.41 \text{ cm}^{-1}$

Energy: -4068.830081

Energy (M06-2X-D3/def2-TZVP//B3LYP-D3(BJ)/def2-SVP): -4070.166708

0 1

|    |          |          |          |
|----|----------|----------|----------|
| Cu | -1.67921 | -0.89025 | -0.36087 |
| C  | -2.71354 | -2.61683 | -1.06044 |
| H  | -2.3781  | -3.27707 | -0.2486  |
| H  | -3.6603  | -3.00056 | -1.44708 |
| H  | -1.99052 | -2.5833  | -1.89192 |
| C  | -3.27598 | 0.43382  | -0.35033 |
| H  | -3.33206 | 0.88378  | 0.63947  |
| C  | -3.82286 | -0.90814 | -0.55328 |
| C  | -3.05054 | 1.23896  | -1.51926 |
| O  | -3.08042 | 0.7618   | -2.66884 |

|   |          |          |          |
|---|----------|----------|----------|
| H | -4.30702 | -0.99098 | -1.52797 |
| C | -2.76606 | 2.71279  | -1.35977 |
| C | -2.30683 | 3.41204  | -2.48762 |
| C | -2.97689 | 3.42577  | -0.16967 |
| C | -2.05525 | 4.78246  | -2.42865 |
| H | -2.1721  | 2.84683  | -3.41102 |
| C | -2.74016 | 4.80073  | -0.11154 |
| H | -3.34732 | 2.91193  | 0.71782  |
| C | -2.27562 | 5.48376  | -1.23891 |
| H | -1.69297 | 5.30958  | -3.31495 |
| H | -2.9216  | 5.34248  | 0.82011  |
| H | -2.08763 | 6.55927  | -1.19069 |
| C | -4.58296 | -1.50636 | 0.58013  |
| C | -5.88341 | -1.98997 | 0.38079  |
| C | -4.02835 | -1.59045 | 1.86884  |
| C | -6.61626 | -2.53208 | 1.4406   |
| H | -6.32646 | -1.93261 | -0.61677 |
| C | -4.75593 | -2.13163 | 2.92758  |
| H | -3.00759 | -1.23498 | 2.03463  |
| C | -6.05631 | -2.60449 | 2.71785  |
| H | -7.63056 | -2.89943 | 1.26574  |
| H | -4.30627 | -2.18962 | 3.92206  |
| H | -6.62717 | -3.03014 | 3.54649  |
| C | -0.13658 | -1.72811 | -3.6126  |
| C | 0.73287  | -2.29565 | -2.67536 |
| C | -0.49307 | -0.38883 | -3.49646 |
| C | 1.29755  | -1.56401 | -1.62433 |
| C | 0.19903  | 0.39993  | -2.5743  |
| C | 1.15892  | -0.13097 | -1.69835 |



|   |          |          |          |
|---|----------|----------|----------|
| O | 1.63139  | -1.31844 | 0.70502  |
| O | 0.44665  | 0.92633  | 0.94211  |
| C | 2.23645  | 0.85592  | -1.28264 |
| C | 3.03791  | 1.10095  | -2.42571 |
| P | 0.11931  | -0.66026 | 0.87838  |
| C | 2.56312  | 1.52858  | -0.07501 |
| C | 4.18056  | 1.88617  | -2.41365 |
| C | 3.75822  | 2.27951  | -0.08747 |
| C | 4.56593  | 2.4549   | -1.2044  |
| H | 4.06863  | 2.79139  | 0.81016  |
| H | 5.4728   | 3.05872  | -1.12531 |
| H | 4.76326  | 2.02964  | -3.32601 |
| H | 2.74989  | 0.60917  | -3.35586 |
| H | 0.04362  | 1.48021  | -2.57132 |
| H | -1.26246 | 0.05851  | -4.12354 |
| H | -0.57313 | -2.35685 | -4.39155 |
| H | 0.93805  | -3.35517 | -2.75542 |
| H | -0.06948 | -0.98375 | 2.24457  |
| C | 1.91894  | -2.237   | -0.37612 |
| C | 3.48274  | -2.4772  | -0.44137 |
| C | 1.38861  | -3.72713 | 0.1003   |
| C | 4.01471  | -2.64408 | 1.00747  |
| C | 3.52731  | -3.93187 | -0.9485  |
| C | 2.72573  | -4.51834 | 0.21389  |
| C | 3.56518  | -4.06811 | 1.42052  |
| H | 3.63001  | -1.85711 | 1.66604  |
| H | 5.11151  | -2.55651 | 0.99537  |
| H | 3.05783  | -4.06037 | -1.93508 |
| H | 4.55977  | -4.31014 | -1.00822 |

|   |          |          |          |
|---|----------|----------|----------|
| H | 2.55083  | -5.60388 | 0.18516  |
| H | 3.01322  | -4.09507 | 2.36901  |
| H | 4.42985  | -4.73946 | 1.53767  |
| C | 4.32223  | -1.5077  | -1.25106 |
| H | 3.9331   | -1.37782 | -2.26897 |
| H | 4.38574  | -0.52174 | -0.77624 |
| H | 5.3468   | -1.90547 | -1.33031 |
| C | 0.4618   | -4.53285 | -0.82836 |
| H | -0.43571 | -3.97921 | -1.1217  |
| H | 0.96391  | -4.9013  | -1.7321  |
| H | 0.12971  | -5.42498 | -0.27522 |
| C | 0.63981  | -3.66003 | 1.44104  |
| H | -0.36636 | -3.23184 | 1.30299  |
| H | 0.49794  | -4.68246 | 1.82351  |
| H | 1.15966  | -3.0815  | 2.2107   |
| C | 1.62507  | 1.71705  | 1.13711  |
| C | 1.07387  | 3.21818  | 1.14945  |
| C | 2.245    | 1.58309  | 2.63307  |
| C | -0.17092 | 3.26086  | 2.0805   |
| C | 2.08986  | 3.9422   | 2.05585  |
| C | 1.92393  | 2.98696  | 3.24463  |
| C | 0.41554  | 3.15112  | 3.51303  |
| H | -0.8919  | 2.4756   | 1.83388  |
| H | -0.6787  | 4.22332  | 1.92791  |
| H | 3.10527  | 4.01977  | 1.65692  |
| H | 1.75397  | 4.96536  | 2.28719  |
| H | 2.55371  | 3.19157  | 4.12364  |
| H | -0.02072 | 2.33511  | 4.10258  |
| H | 0.24561  | 4.07674  | 4.0842   |

|   |         |          |          |
|---|---------|----------|----------|
| C | 0.79464 | 3.80119  | -0.22491 |
| H | 1.69857 | 3.86552  | -0.84557 |
| H | 0.05075 | 3.19149  | -0.75765 |
| H | 0.37231 | 4.81153  | -0.1276  |
| C | 1.60205 | 0.46658  | 3.46555  |
| H | 0.50907 | 0.48926  | 3.45222  |
| H | 1.93921 | -0.52236 | 3.12558  |
| H | 1.91943 | 0.58265  | 4.51369  |
| C | 3.76064 | 1.31029  | 2.71688  |
| H | 4.38268 | 2.19185  | 2.52268  |
| H | 4.00178 | 0.9839   | 3.74004  |
| H | 4.07005 | 0.51213  | 2.02794  |

Optimized reductive elimination transition structure of the active catalyst system (MeCu • BIFOP-H • chalcone) of the reaction pathway (B3LYP-D3(BJ)/def2-SVP)**TS-1.2 (R)**

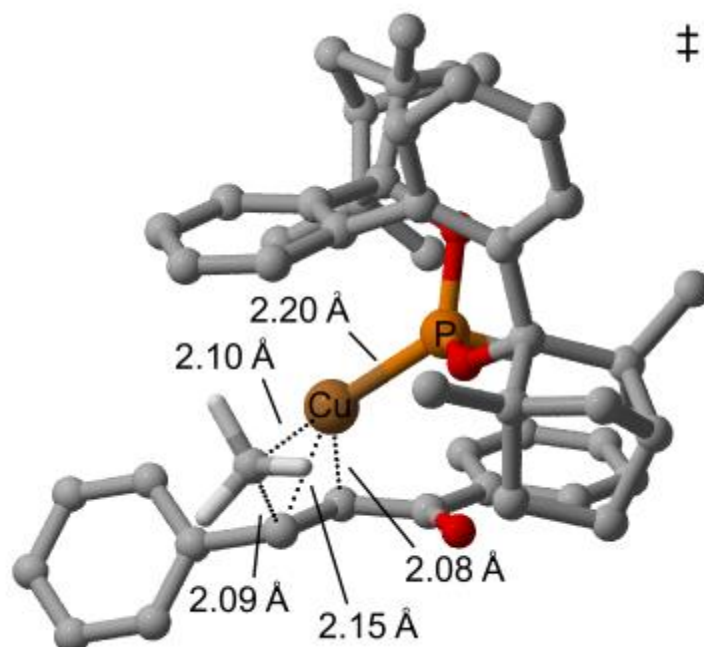

Imaginary frequency:  $-365.02 \text{ cm}^{-1}$

Energy:  $-4068.831997$

Energy (M06-2X-D3/def2-TZVP//B3LYP-D3(BJ)/def2-SVP): -4070.168599

0 1

|    |          |          |          |
|----|----------|----------|----------|
| Cu | -1.66164 | 0.02651  | -0.46859 |
| C  | -1.8765  | 0.16011  | -2.55132 |
| H  | -1.64284 | -0.91835 | -2.55569 |
| H  | -2.55536 | 0.36068  | -3.38251 |
| H  | -0.96267 | 0.763    | -2.65004 |
| C  | -3.31687 | 1.13937  | 0.12348  |
| H  | -4.06383 | 0.60631  | 0.70891  |
| C  | -3.35889 | 1.0078   | -1.34272 |
| C  | -2.46509 | 2.12098  | 0.71663  |
| O  | -1.63767 | 2.78443  | 0.04011  |
| H  | -3.15663 | 1.95601  | -1.8486  |
| C  | -2.47981 | 2.31258  | 2.21341  |
| C  | -1.68223 | 3.33814  | 2.74649  |
| C  | -3.20222 | 1.4976   | 3.10126  |
| C  | -1.60184 | 3.54189  | 4.12448  |
| H  | -1.1302  | 3.96456  | 2.04518  |
| C  | -3.12152 | 1.69746  | 4.48018  |
| H  | -3.8223  | 0.68624  | 2.71869  |
| C  | -2.31933 | 2.71945  | 4.99821  |
| H  | -0.97622 | 4.34611  | 4.52035  |
| H  | -3.68607 | 1.04961  | 5.15563  |
| H  | -2.2554  | 2.87339  | 6.07829  |
| C  | -4.5295  | 0.25763  | -1.88211 |
| C  | -5.37783 | 0.85336  | -2.826   |
| C  | -4.81613 | -1.04979 | -1.45578 |
| C  | -6.48922 | 0.16712  | -3.32371 |

|   |          |          |          |
|---|----------|----------|----------|
| H | -5.16569 | 1.86978  | -3.16748 |
| C | -5.92344 | -1.7374  | -1.95149 |
| H | -4.15436 | -1.53431 | -0.73364 |
| C | -6.76703 | -1.13049 | -2.8883  |
| H | -7.14132 | 0.65068  | -4.05535 |
| H | -6.1281  | -2.75498 | -1.60912 |
| H | -7.63392 | -1.66893 | -3.27857 |
| C | -0.38447 | -3.44087 | -2.45327 |
| C | -0.16428 | -3.32062 | -1.08217 |
| C | 0.31498  | -2.61495 | -3.32536 |
| C | 0.73294  | -2.40117 | -0.51474 |
| C | 1.28728  | -1.76698 | -2.80186 |
| C | 1.55905  | -1.65546 | -1.42527 |
| O | 1.24617  | -0.85484 | 1.20821  |
| O | 1.18568  | 1.05572  | -0.62055 |
| C | 2.9472   | -1.07453 | -1.16072 |
| C | 3.90608  | -2.04704 | -1.52578 |
| P | 0.29368  | 0.31324  | 0.50779  |
| C | 3.42144  | 0.21874  | -0.78358 |
| C | 5.2791   | -1.85107 | -1.45544 |
| C | 4.81895  | 0.37661  | -0.70362 |
| C | 5.74099  | -0.61913 | -1.00941 |
| H | 5.22331  | 1.33495  | -0.41601 |
| H | 6.80996  | -0.41163 | -0.92236 |
| H | 5.9657   | -2.65036 | -1.74264 |
| H | 3.53709  | -3.01192 | -1.87323 |
| H | 1.91735  | -1.20403 | -3.48841 |
| H | 0.1449   | -2.65546 | -4.40328 |
| H | -1.11014 | -4.16806 | -2.82386 |

|   |          |          |          |
|---|----------|----------|----------|
| H | -0.72726 | -3.97558 | -0.43152 |
| H | 0.30525  | 1.18955  | 1.60222  |
| C | 0.80311  | -2.21204 | 1.02292  |
| C | 1.78923  | -3.21922 | 1.73346  |
| C | -0.55833 | -2.44053 | 1.9416   |
| C | 2.04128  | -2.72288 | 3.18707  |
| C | 0.8414   | -4.41365 | 1.96731  |
| C | -0.14516 | -3.64608 | 2.84728  |
| C | 0.79224  | -3.1878  | 3.97607  |
| H | 2.18766  | -1.63539 | 3.2065   |
| H | 2.96197  | -3.18242 | 3.5754   |
| H | 0.4164   | -4.82112 | 1.04038  |
| H | 1.34555  | -5.23637 | 2.49783  |
| H | -1.02342 | -4.20596 | 3.20181  |
| H | 0.36674  | -2.41248 | 4.62442  |
| H | 1.02975  | -4.04786 | 4.62121  |
| C | 3.08043  | -3.5679  | 1.02239  |
| H | 2.89815  | -3.96296 | 0.01504  |
| H | 3.74772  | -2.70147 | 0.94161  |
| H | 3.60698  | -4.34668 | 1.59705  |
| C | -1.88086 | -2.76937 | 1.22402  |
| H | -2.0534  | -2.12064 | 0.34958  |
| H | -1.9646  | -3.81283 | 0.89653  |
| H | -2.71076 | -2.594   | 1.92512  |
| C | -0.8806  | -1.20619 | 2.80784  |
| H | -1.4086  | -0.4365  | 2.22885  |
| H | -1.57236 | -1.50759 | 3.60865  |
| H | -0.00575 | -0.74339 | 3.27369  |
| C | 2.54278  | 1.48782  | -0.70626 |

|   |         |         |          |
|---|---------|---------|----------|
| C | 2.63669 | 2.2857  | -2.08332 |
| C | 2.90045 | 2.67731 | 0.35985  |
| C | 1.47621 | 3.32561 | -2.11279 |
| C | 3.84638 | 3.20248 | -1.83065 |
| C | 3.25019 | 3.87506 | -0.59008 |
| C | 1.97272 | 4.47744 | -1.2031  |
| H | 0.52893 | 2.89383 | -1.76843 |
| H | 1.32858 | 3.66388 | -3.1494  |
| H | 4.79184 | 2.67292 | -1.67252 |
| H | 3.99671 | 3.9079  | -2.66303 |
| H | 3.88845 | 4.61227 | -0.0799  |
| H | 1.22413 | 4.79508 | -0.46858 |
| H | 2.24069 | 5.36711 | -1.794   |
| C | 2.67195 | 1.43639 | -3.34087 |
| H | 3.49963 | 0.71291 | -3.34109 |
| H | 1.72601 | 0.88959 | -3.46055 |
| H | 2.79106 | 2.08838 | -4.22049 |
| C | 1.72013 | 3.07959 | 1.26434  |
| H | 0.7483  | 3.10594 | 0.75938  |
| H | 1.64614 | 2.42283 | 2.14166  |
| H | 1.92254 | 4.09003 | 1.65325  |
| C | 4.06782 | 2.40908 | 1.33081  |
| H | 5.06059 | 2.55518 | 0.88725  |
| H | 3.99987 | 3.12582 | 2.16342  |
| H | 4.02293 | 1.3958  | 1.75623  |

Optimized reductive elimination transition structure of the active catalyst system (MeCu • BIFOP-H • chalcone) of the reaction pathway (B3LYP-D3(BJ)/def2-SVP)**TS-1 (R)**

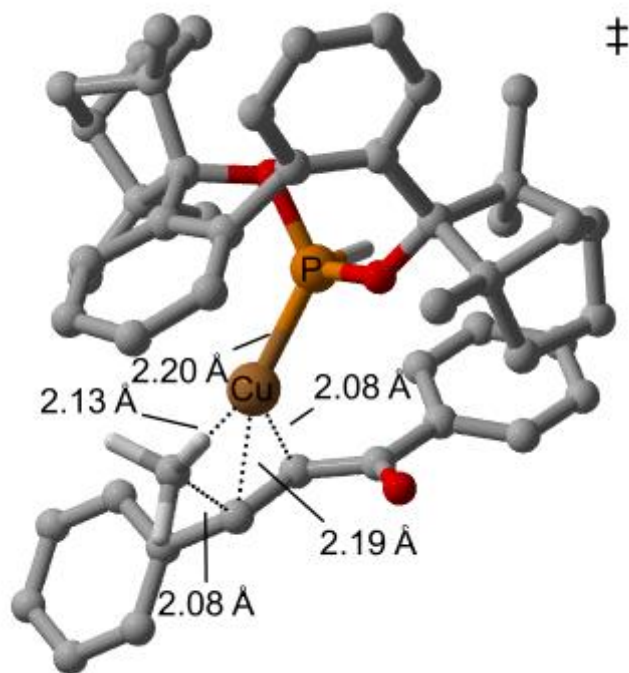

Imaginary frequency:  $-377.22 \text{ cm}^{-1}$

Energy:  $-4068.831603$

Energy (M06-2X-D3/def2-TZVP//B3LYP-D3(BJ)/def2-SVP):  $-4070.170920$

0 1

|    |         |          |          |
|----|---------|----------|----------|
| Cu | 1.71091 | 0.27022  | 0.49538  |
| C  | 2.73361 | -0.4421  | 2.21911  |
| H  | 3.02766 | -1.42704 | 1.83309  |
| H  | 3.39897 | -0.17165 | 3.04133  |
| H  | 1.70417 | -0.46948 | 2.61562  |
| C  | 3.01649 | 1.81944  | 0.02076  |
| H  | 3.50546 | 1.72495  | -0.94786 |
| C  | 3.59092 | 1.14369  | 1.18885  |
| C  | 1.9805  | 2.783    | 0.23671  |
| O  | 1.47613 | 2.98886  | 1.36416  |
| H  | 3.49887 | 1.76023  | 2.08659  |



|   |          |          |          |
|---|----------|----------|----------|
| C | 1.42936  | 3.54285  | -0.94373 |
| C | 0.73222  | 4.73382  | -0.68956 |
| C | 1.5187   | 3.0822   | -2.26734 |
| C | 0.15175  | 5.45655  | -1.73206 |
| H | 0.65097  | 5.06076  | 0.34821  |
| C | 0.92424  | 3.79573  | -3.31033 |
| H | 2.03491  | 2.14484  | -2.48158 |
| C | 0.24062  | 4.98681  | -3.04661 |
| H | -0.38312 | 6.38566  | -1.51913 |
| H | 0.98946  | 3.41763  | -4.33377 |
| H | -0.22465 | 5.54458  | -3.8631  |
| C | 4.93035  | 0.51575  | 1.00914  |
| C | 5.21174  | -0.30753 | -0.09379 |
| C | 5.94609  | 0.74061  | 1.94928  |
| C | 6.47153  | -0.88351 | -0.25427 |
| H | 4.4287   | -0.50451 | -0.82842 |
| C | 7.21078  | 0.16787  | 1.78982  |
| H | 5.7413   | 1.37935  | 2.81245  |
| C | 7.47865  | -0.64737 | 0.68777  |
| H | 6.66975  | -1.52247 | -1.11863 |
| H | 7.99058  | 0.36112  | 2.53068  |
| H | 8.46611  | -1.09801 | 0.56276  |
| C | 0.86982  | -3.38321 | 2.61264  |
| C | 0.66453  | -3.37206 | 1.23403  |
| C | 0.08407  | -2.57118 | 3.42227  |
| C | -0.31152 | -2.58598 | 0.60207  |
| C | -0.96822 | -1.87042 | 2.8382   |
| C | -1.23746 | -1.89579 | 1.45716  |
| O | -0.96499 | -1.18299 | -1.19582 |

|   |          |          |          |
|---|----------|----------|----------|
| O | -1.30278 | 0.82     | 0.49069  |
| C | -2.69389 | -1.56411 | 1.1481   |
| C | -3.48212 | -2.65741 | 1.57865  |
| P | -0.23799 | 0.14743  | -0.52078 |
| C | -3.36739 | -0.40369 | 0.66612  |
| C | -4.86575 | -2.70479 | 1.48142  |
| C | -4.77004 | -0.49611 | 0.55835  |
| C | -5.51766 | -1.60697 | 0.93332  |
| H | -5.3253  | 0.35175  | 0.18962  |
| H | -6.60385 | -1.59101 | 0.81814  |
| H | -5.41384 | -3.58512 | 1.82394  |
| H | -2.9612  | -3.51771 | 1.99931  |
| H | -1.66719 | -1.33465 | 3.47949  |
| H | 0.24877  | -2.51811 | 4.50051  |
| H | 1.66031  | -4.00582 | 3.03673  |
| H | 1.30685  | -4.00024 | 0.63165  |
| H | -0.32366 | 0.94142  | -1.67659 |
| C | -0.3611  | -2.4652  | -0.94222 |
| C | -1.1986  | -3.60384 | -1.64632 |
| C | 1.04563  | -2.55126 | -1.81452 |
| C | -1.48524 | -3.17083 | -3.11337 |
| C | -0.10446 | -4.67282 | -1.84285 |
| C | 0.79585  | -3.80068 | -2.71821 |
| C | -0.16713 | -3.47041 | -3.86959 |
| H | -1.78235 | -2.11548 | -3.15754 |
| H | -2.32354 | -3.76239 | -3.50962 |
| H | 0.35156  | -5.00807 | -0.90148 |
| H | -0.49069 | -5.56076 | -2.3671  |
| H | 1.74195  | -4.25365 | -3.04991 |

|   |          |          |          |
|---|----------|----------|----------|
| H | 0.17012  | -2.64677 | -4.51098 |
| H | -0.27443 | -4.35388 | -4.51778 |
| C | -2.44876 | -4.09633 | -0.94678 |
| H | -2.23823 | -4.43724 | 0.07465  |
| H | -3.22237 | -3.32036 | -0.90145 |
| H | -2.86075 | -4.95061 | -1.50757 |
| C | 2.371    | -2.7374  | -1.05579 |
| H | 2.46397  | -2.04901 | -0.20507 |
| H | 2.53705  | -3.75907 | -0.69398 |
| H | 3.1988   | -2.51935 | -1.74771 |
| C | 1.26395  | -1.29336 | -2.67982 |
| H | 1.67345  | -0.46374 | -2.08084 |
| H | 2.01995  | -1.52121 | -3.44651 |
| H | 0.36193  | -0.93843 | -3.18723 |
| C | -2.72532 | 0.99226  | 0.49627  |
| C | -3.01939 | 1.87631  | 1.78929  |
| C | -3.25837 | 1.98626  | -0.68663 |
| C | -2.07855 | 3.11812  | 1.75447  |
| C | -4.36506 | 2.52944  | 1.42494  |
| C | -3.85394 | 3.18141  | 0.13495  |
| C | -2.72977 | 4.0614   | 0.71011  |
| H | -1.03886 | 2.85837  | 1.52146  |
| H | -2.07184 | 3.57581  | 2.75502  |
| H | -5.1983  | 1.8296   | 1.3055   |
| H | -4.66476 | 3.27242  | 2.18061  |
| H | -4.59549 | 3.73823  | -0.45775 |
| H | -2.02173 | 4.42998  | -0.03986 |
| H | -3.17394 | 4.94637  | 1.19201  |
| C | -2.94231 | 1.13835  | 3.11383  |

|   |          |         |          |
|---|----------|---------|----------|
| H | -3.6324  | 0.28398 | 3.16419  |
| H | -1.91865 | 0.77655 | 3.2876   |
| H | -3.19381 | 1.82747 | 3.93507  |
| C | -2.14412 | 2.50396 | -1.61095 |
| H | -1.22248 | 2.78146 | -1.09357 |
| H | -1.90534 | 1.77508 | -2.39711 |
| H | -2.51021 | 3.40708 | -2.12176 |
| C | -4.32245 | 1.41691 | -1.64805 |
| H | -5.34185 | 1.42452 | -1.24336 |
| H | -4.3503  | 2.04968 | -2.54824 |
| H | -4.08235 | 0.39186 | -1.96608 |

Optimized reductive elimination transition structure of the active catalyst system (MeCu • BIFOP-H • chalcone) of the reaction pathway (B3LYP-D3(BJ)/def2-SVP) **TS-1.1 (R)**

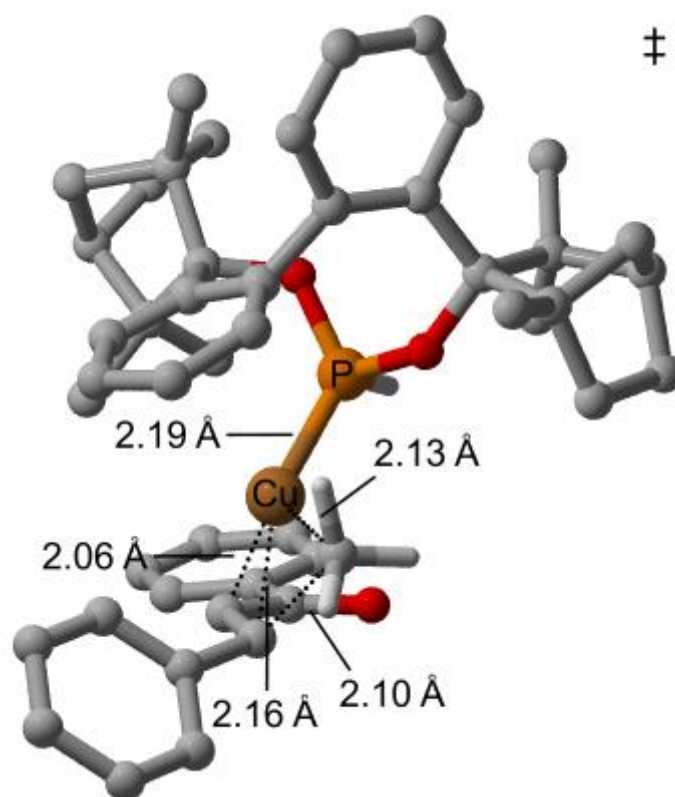

Imaginary frequency:  $-376.75 \text{ cm}^{-1}$

Energy: -4068.832571

Energy (M06-2X-D3/def2-TZVP//B3LYP-D3(BJ)/def2-SVP): -4070.170295

0 1

|    |         |          |          |
|----|---------|----------|----------|
| Cu | 1.47115 | -0.71389 | 0.48655  |
| C  | 1.28005 | -2.78985 | 0.92122  |
| H  | 0.53878 | -2.73653 | 0.10677  |
| H  | 1.80102 | -3.74657 | 0.84046  |
| H  | 0.79691 | -2.69073 | 1.90153  |
| C  | 3.44934 | -0.46545 | 1.02198  |
| H  | 4.09666 | -0.06423 | 0.24515  |
| C  | 3.17989 | -1.9101  | 1.0378   |
| C  | 3.04257 | 0.32669  | 2.14536  |
| O  | 2.30594 | -0.13417 | 3.0475   |
| H  | 3.21093 | -2.33205 | 2.04588  |
| C  | 3.41909 | 1.78758  | 2.18974  |
| C  | 2.74896 | 2.59972  | 3.11789  |
| C  | 4.3549  | 2.38226  | 1.32863  |
| C  | 2.98282 | 3.97394  | 3.16645  |
| H  | 2.03666 | 2.11324  | 3.78653  |
| C  | 4.59502 | 3.75678  | 1.37821  |
| H  | 4.90527 | 1.77049  | 0.61283  |
| C  | 3.90391 | 4.55949  | 2.29171  |
| H  | 2.44567 | 4.59394  | 3.889    |
| H  | 5.3274  | 4.20454  | 0.70156  |
| H  | 4.08919 | 5.63602  | 2.32641  |
| C  | 3.89755 | -2.71682 | 0.0108   |
| C  | 4.56838 | -3.89387 | 0.37415  |
| C  | 3.92109 | -2.32442 | -1.33744 |

|   |          |          |          |
|---|----------|----------|----------|
| C | 5.24963  | -4.65467 | -0.57987 |
| H | 4.55878  | -4.21196 | 1.41992  |
| C | 4.59757  | -3.08284 | -2.29213 |
| H | 3.38798  | -1.42192 | -1.63973 |
| C | 5.26679  | -4.25301 | -1.91773 |
| H | 5.7706   | -5.56571 | -0.27499 |
| H | 4.60204  | -2.76086 | -3.33693 |
| H | 5.79721  | -4.84784 | -2.66512 |
| C | 1.10621  | -1.61752 | -3.23974 |
| C | 0.78829  | -0.29081 | -2.94597 |
| C | 0.32512  | -2.63896 | -2.7132  |
| C | -0.29856 | 0.08453  | -2.1417  |
| C | -0.83194 | -2.2959  | -2.01763 |
| C | -1.20554 | -0.96447 | -1.75723 |
| O | -1.11336 | 1.41972  | -0.36342 |
| O | -1.53633 | -0.66985 | 1.11209  |
| C | -2.69667 | -0.81588 | -1.49434 |
| C | -3.37938 | -1.08511 | -2.7045  |
| P | -0.38998 | 0.41937  | 0.73993  |
| C | -3.47484 | -0.553   | -0.33062 |
| C | -4.75684 | -1.00601 | -2.852   |
| C | -4.86596 | -0.43314 | -0.52754 |
| C | -5.50886 | -0.63293 | -1.74454 |
| H | -5.49947 | -0.20479 | 0.31499  |
| H | -6.59407 | -0.52432 | -1.80602 |
| H | -5.22255 | -1.21442 | -3.8175  |
| H | -2.77599 | -1.33985 | -3.57636 |
| H | -1.51832 | -3.08363 | -1.70573 |
| H | 0.58194  | -3.6874  | -2.87642 |

|   |          |          |          |
|---|----------|----------|----------|
| H | 1.97814  | -1.84126 | -3.85691 |
| H | 1.42872  | 0.4781   | -3.35551 |
| H | -0.40232 | 1.30238  | 1.83504  |
| C | -0.47273 | 1.5479   | -1.65349 |
| C | -1.35087 | 2.44512  | -2.61047 |
| C | 0.85168  | 2.52481  | -1.4651  |
| C | -1.76829 | 3.73084  | -1.83891 |
| C | -0.25608 | 2.98277  | -3.55488 |
| C | 0.54622  | 3.68739  | -2.46136 |
| C | -0.51661 | 4.6406   | -1.89522 |
| H | -2.08298 | 3.48735  | -0.81617 |
| H | -2.62967 | 4.19285  | -2.3434  |
| H | 0.28861  | 2.18704  | -4.08313 |
| H | -0.66837 | 3.67165  | -4.30857 |
| H | 1.4678   | 4.195    | -2.78165 |
| H | -0.24652 | 5.07907  | -0.92671 |
| H | -0.66688 | 5.47768  | -2.59471 |
| C | -2.53038 | 1.80568  | -3.31427 |
| H | -2.23648 | 0.91458  | -3.88264 |
| H | -3.32381 | 1.52557  | -2.61098 |
| H | -2.95539 | 2.53131  | -4.02629 |
| C | 2.24961  | 1.96226  | -1.77951 |
| H | 2.42341  | 0.99244  | -1.29421 |
| H | 2.46115  | 1.8764   | -2.8531  |
| H | 2.99344  | 2.66097  | -1.36914 |
| C | 0.95811  | 3.04456  | -0.0205  |
| H | 1.38141  | 2.27809  | 0.64093  |
| H | 1.67041  | 3.88201  | 0.00894  |
| H | 0.00915  | 3.38638  | 0.40331  |

|   |          |          |          |
|---|----------|----------|----------|
| C | -2.96587 | -0.67053 | 1.12499  |
| C | -3.35874 | -2.11227 | 1.68921  |
| C | -3.58927 | 0.29888  | 2.27734  |
| C | -2.53619 | -2.36224 | 2.98704  |
| C | -4.75154 | -1.85078 | 2.29082  |
| C | -4.28655 | -0.73121 | 3.23119  |
| C | -3.24673 | -1.50251 | 4.0646   |
| H | -1.47983 | -2.10649 | 2.84992  |
| H | -2.58269 | -3.43355 | 3.23268  |
| H | -5.51938 | -1.56903 | 1.56413  |
| H | -5.12334 | -2.73167 | 2.83754  |
| H | -5.06796 | -0.24779 | 3.83653  |
| H | -2.5622  | -0.86183 | 4.63297  |
| H | -3.76847 | -2.13662 | 4.79772  |
| C | -3.22262 | -3.25384 | 0.69617  |
| H | -3.85201 | -3.11825 | -0.19422 |
| H | -2.17567 | -3.35264 | 0.37283  |
| H | -3.51272 | -4.2011  | 1.17716  |
| C | -2.52133 | 1.09179  | 3.04861  |
| H | -1.64134 | 0.5029   | 3.32532  |
| H | -2.1928  | 1.97083  | 2.47711  |
| H | -2.97497 | 1.46669  | 3.97936  |
| C | -4.60088 | 1.36752  | 1.81368  |
| H | -5.61521 | 0.98208  | 1.65391  |
| H | -4.68883 | 2.13132  | 2.6013   |
| H | -4.27005 | 1.87082  | 0.89374  |

Optimized reductive elimination transition structure of the active catalyst system (MeCu • BIFOP-H • chalcone) of the reaction pathway (B3LYP-D3(BJ)/def2-SVP)**TS-7.1 (R)**



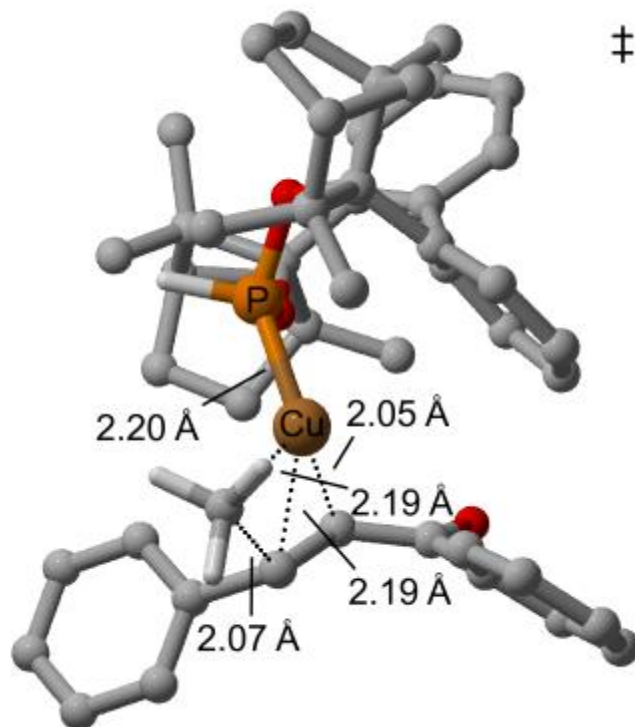

Imaginary frequency:  $-402.44 \text{ cm}^{-1}$

Energy:  $-4068.819540$

Energy (M06-2X-D3/def2-TZVP//B3LYP-D3(BJ)/def2-SVP):  $-4070.158427$

0 1

|    |          |          |          |
|----|----------|----------|----------|
| Cu | -1.51404 | -0.33461 | 0.75003  |
| C  | -3.04882 | -0.57087 | 2.28841  |
| H  | -2.62799 | -1.59157 | 2.34368  |
| H  | -2.58535 | 0.07308  | 3.04877  |
| H  | -4.11841 | -0.65251 | 2.50368  |
| C  | -2.70424 | 0.58183  | -0.64478 |
| H  | -2.2363  | 1.55425  | -0.81069 |
| C  | -3.5476  | 0.44069  | 0.55256  |
| C  | -2.80331 | -0.18245 | -1.86033 |
| O  | -2.32134 | 0.22087  | -2.92987 |
| H  | -4.41143 | -0.21068 | 0.40732  |

|   |          |          |          |
|---|----------|----------|----------|
| C | -3.5034  | -1.52535 | -1.87673 |
| C | -4.11559 | -1.92436 | -3.07539 |
| C | -3.49427 | -2.4254  | -0.80234 |
| C | -4.72076 | -3.1757  | -3.18799 |
| H | -4.08338 | -1.23112 | -3.91776 |
| C | -4.08587 | -3.68609 | -0.91299 |
| H | -2.98599 | -2.16504 | 0.1266   |
| C | -4.70815 | -4.06326 | -2.10546 |
| H | -5.1994  | -3.46714 | -4.1265  |
| H | -4.05161 | -4.37768 | -0.0673  |
| H | -5.17547 | -5.04716 | -2.19464 |
| C | -3.89349 | 1.72399  | 1.23712  |
| C | -5.22355 | 2.02081  | 1.56093  |
| C | -2.9013  | 2.66624  | 1.55905  |
| C | -5.55807 | 3.23067  | 2.17751  |
| H | -6.00761 | 1.29851  | 1.31859  |
| C | -3.23027 | 3.87159  | 2.17559  |
| H | -1.85833 | 2.44672  | 1.32203  |
| C | -4.56394 | 4.1609   | 2.48679  |
| H | -6.60272 | 3.44611  | 2.41528  |
| H | -2.44221 | 4.59038  | 2.41416  |
| H | -4.82429 | 5.10619  | 2.96868  |
| C | -0.38907 | -3.31865 | -1.81311 |
| C | 0.3947   | -3.22839 | -0.66277 |
| C | -0.43778 | -2.24071 | -2.68773 |
| C | 1.16432  | -2.09972 | -0.33978 |
| C | 0.40526  | -1.15809 | -2.45713 |
| C | 1.25848  | -1.07441 | -1.34417 |
| O | 1.92975  | -0.53206 | 1.27191  |

|   |          |          |          |
|---|----------|----------|----------|
| O | 0.72543  | 1.44413  | -0.00387 |
| C | 2.45667  | -0.16476 | -1.59656 |
| C | 3.31961  | -0.83345 | -2.49642 |
| P | 0.53315  | 0.34361  | 1.16679  |
| C | 2.78437  | 1.17312  | -1.23062 |
| C | 4.50794  | -0.30104 | -2.97633 |
| C | 4.01057  | 1.67333  | -1.71451 |
| C | 4.8712   | 0.9709   | -2.55079 |
| H | 4.30826  | 2.67777  | -1.45741 |
| H | 5.80172  | 1.43676  | -2.88309 |
| H | 5.13257  | -0.87533 | -3.6639  |
| H | 3.02883  | -1.83337 | -2.81892 |
| H | 0.44082  | -0.35957 | -3.1948  |
| H | -1.101   | -2.23407 | -3.55195 |
| H | -0.98866 | -4.21301 | -1.99209 |
| H | 0.38773  | -4.07475 | 0.011    |
| H | 0.74791  | 1.09518  | 2.34246  |
| C | 1.83298  | -1.95839 | 1.04946  |
| C | 3.26484  | -2.61244 | 1.15152  |
| C | 1.10182  | -2.63348 | 2.37231  |
| C | 3.96056  | -2.08999 | 2.44185  |
| C | 2.88052  | -4.04879 | 1.56215  |
| C | 2.18439  | -3.64717 | 2.86311  |
| C | 3.33333  | -2.92575 | 3.58527  |
| H | 3.80811  | -1.00952 | 2.55813  |
| H | 5.04457  | -2.25904 | 2.36396  |
| H | 2.23514  | -4.55193 | 0.82949  |
| H | 3.76887  | -4.67946 | 1.72199  |
| H | 1.73679  | -4.46276 | 3.4503   |

|   |          |          |          |
|---|----------|----------|----------|
| H | 3.01297  | -2.32557 | 4.44593  |
| H | 4.04699  | -3.67206 | 3.96725  |
| C | 4.17043  | -2.51897 | -0.05913 |
| H | 3.69216  | -2.9269  | -0.95811 |
| H | 4.47023  | -1.48425 | -0.26501 |
| H | 5.0849   | -3.10367 | 0.13061  |
| C | -0.23099 | -3.37769 | 2.17127  |
| H | -0.92619 | -2.8153  | 1.53403  |
| H | -0.11586 | -4.38268 | 1.74826  |
| H | -0.70989 | -3.50532 | 3.15417  |
| C | 0.80528  | -1.58631 | 3.46431  |
| H | -0.10982 | -1.02115 | 3.23144  |
| H | 0.61113  | -2.11145 | 4.41179  |
| H | 1.61909  | -0.8742  | 3.63173  |
| C | 1.81042  | 2.178    | -0.57761 |
| C | 1.14271  | 3.08239  | -1.71188 |
| C | 2.38361  | 3.31999  | 0.43806  |
| C | -0.07716 | 3.82097  | -1.08876 |
| C | 2.14981  | 4.24407  | -1.8095  |
| C | 2.04894  | 4.64352  | -0.33185 |
| C | 0.5455   | 4.96423  | -0.24815 |
| H | -0.70173 | 3.13719  | -0.50596 |
| H | -0.70701 | 4.21058  | -1.90124 |
| H | 3.14807  | 3.95605  | -2.15344 |
| H | 1.78375  | 5.03333  | -2.48456 |
| H | 2.69708  | 5.4702   | -0.00375 |
| H | 0.1531   | 5.02039  | 0.77493  |
| H | 0.35796  | 5.94536  | -0.71059 |
| C | 0.76625  | 2.36886  | -2.99958 |

|   |          |         |          |
|---|----------|---------|----------|
| H | 1.6135   | 1.83022 | -3.44657 |
| H | -0.06554 | 1.66692 | -2.83612 |
| H | 0.41738  | 3.11191 | -3.73413 |
| C | 1.68371  | 3.31665 | 1.80799  |
| H | 0.5976   | 3.18936 | 1.75359  |
| H | 2.09676  | 2.53639 | 2.46178  |
| H | 1.87959  | 4.28223 | 2.29961  |
| C | 3.88759  | 3.26669 | 0.77737  |
| H | 4.53306  | 3.69845 | 0.00316  |
| H | 4.06348  | 3.86403 | 1.68527  |
| H | 4.22642  | 2.24025 | 0.97926  |

Optimized reductive elimination transition structure of the active catalyst system (MeCu • BIFOP-H • chalcone) of the reaction pathway (B3LYP-D3(BJ)/def2-SVP) **TS-2.2 (R)**

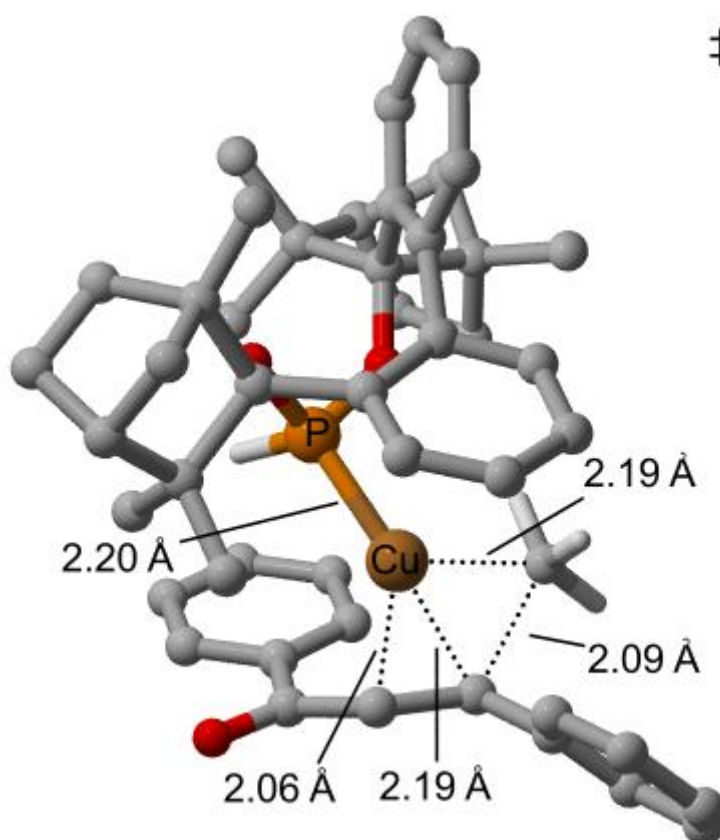

Imaginary frequency:  $-388.90 \text{ cm}^{-1}$

Energy: -4068.827153

Energy (M06-2X-D3/def2-TZVP//B3LYP-D3(BJ)/def2-SVP): -4070.164400

0 1

|    |          |          |          |
|----|----------|----------|----------|
| Cu | -1.70657 | 0.32967  | 0.10443  |
| C  | -2.16799 | 1.43923  | -1.72245 |
| H  | -1.12317 | 1.76658  | -1.59427 |
| H  | -2.21951 | 0.57575  | -2.39531 |
| H  | -2.74448 | 2.267    | -2.14514 |
| C  | -3.54563 | 0.52726  | 1.0041   |
| H  | -4.12688 | -0.39112 | 1.10767  |
| C  | -3.67114 | 1.22955  | -0.27966 |
| C  | -3.03003 | 0.97565  | 2.27752  |
| O  | -3.25316 | 0.32475  | 3.30984  |
| H  | -3.77304 | 2.31374  | -0.21176 |
| C  | -2.06018 | 2.15306  | 2.40474  |
| C  | -1.41767 | 2.27382  | 3.65077  |
| C  | -1.69099 | 3.05748  | 1.39015  |
| C  | -0.43015 | 3.23248  | 3.87109  |
| H  | -1.72187 | 1.57196  | 4.42821  |
| C  | -0.70191 | 4.02252  | 1.6094   |
| H  | -2.15649 | 3.02812  | 0.41072  |
| C  | -0.06241 | 4.1123   | 2.84699  |
| H  | 0.05859  | 3.29476  | 4.84682  |
| H  | -0.43317 | 4.70753  | 0.80183  |
| H  | 0.71412  | 4.86282  | 3.01328  |
| C  | -4.66585 | 0.64489  | -1.22811 |
| C  | -5.55832 | 1.47842  | -1.91613 |
| C  | -4.72525 | -0.73823 | -1.46475 |

|   |          |          |          |
|---|----------|----------|----------|
| C | -6.49317 | 0.94733  | -2.80927 |
| H | -5.52348 | 2.55768  | -1.7442  |
| C | -5.65306 | -1.27058 | -2.35843 |
| H | -4.0267  | -1.3994  | -0.95039 |
| C | -6.54371 | -0.42974 | -3.0352  |
| H | -7.18523 | 1.61408  | -3.32951 |
| H | -5.68263 | -2.34983 | -2.52958 |
| H | -7.27208 | -0.84711 | -3.73445 |
| C | -1.82781 | -2.7313  | -2.0623  |
| C | -1.14204 | -2.90351 | -0.85879 |
| C | -1.3382  | -1.83417 | -3.00457 |
| C | 0.04678  | -2.22727 | -0.54318 |
| C | -0.10198 | -1.23576 | -2.77106 |
| C | 0.64374  | -1.44992 | -1.5977  |
| O | 1.31088  | -0.99955 | 1.03882  |
| O | 1.24664  | 1.1446   | -0.40627 |
| C | 2.12972  | -1.19101 | -1.80548 |
| C | 2.62254  | -2.20618 | -2.66199 |
| P | 0.4029   | 0.34701  | 0.73049  |
| C | 3.02302  | -0.15424 | -1.4147  |
| C | 3.94277  | -2.30092 | -3.07577 |
| C | 4.3635   | -0.29838 | -1.83082 |
| C | 4.8365   | -1.33718 | -2.62353 |
| H | 5.0842   | 0.4541   | -1.55259 |
| H | 5.89261  | -1.36744 | -2.90093 |
| H | 4.26051  | -3.11675 | -3.72843 |
| H | 1.91809  | -2.96966 | -2.99305 |
| H | 0.3489   | -0.62167 | -3.55177 |
| H | -1.88238 | -1.63556 | -3.93009 |

|   |          |          |          |
|---|----------|----------|----------|
| H | -2.75394 | -3.28125 | -2.24018 |
| H | -1.56504 | -3.5867  | -0.13499 |
| H | 0.68318  | 1.06349  | 1.90672  |
| C | 0.64707  | -2.27706 | 0.88739  |
| C | 1.67749  | -3.4508  | 1.11062  |
| C | -0.34593 | -2.49245 | 2.19591  |
| C | 2.48929  | -3.15573 | 2.4048   |
| C | 0.72093  | -4.56418 | 1.5845   |
| C | 0.21787  | -3.81007 | 2.81514  |
| C | 1.53855  | -3.55967 | 3.55845  |
| H | 2.79637  | -2.10288 | 2.44264  |
| H | 3.4065   | -3.76311 | 2.40255  |
| H | -0.05753 | -4.80939 | 0.84779  |
| H | 1.2626   | -5.49128 | 1.82912  |
| H | -0.54087 | -4.32139 | 3.42502  |
| H | 1.46301  | -2.80509 | 4.35091  |
| H | 1.87196  | -4.49367 | 4.03706  |
| C | 2.57919  | -3.84188 | -0.04303 |
| H | 2.00827  | -4.07685 | -0.95013 |
| H | 3.30403  | -3.05422 | -0.28201 |
| H | 3.14599  | -4.74399 | 0.23805  |
| C | -1.85824 | -2.66311 | 1.96544  |
| H | -2.26119 | -1.90253 | 1.28471  |
| H | -2.13658 | -3.66133 | 1.60166  |
| H | -2.37284 | -2.51546 | 2.92525  |
| C | -0.23076 | -1.32104 | 3.18829  |
| H | -0.8339  | -0.46322 | 2.86381  |
| H | -0.66816 | -1.63166 | 4.14825  |
| H | 0.7963   | -0.98884 | 3.36943  |



|   |         |         |          |
|---|---------|---------|----------|
| C | 2.6177  | 1.20866 | -0.80705 |
| C | 2.63198 | 2.32616 | -1.94838 |
| C | 3.57964 | 1.88733 | 0.31977  |
| C | 1.84184 | 3.55987 | -1.42298 |
| C | 4.06834 | 2.87489 | -1.85588 |
| C | 3.98205 | 3.23521 | -0.36673 |
| C | 2.79785 | 4.22015 | -0.39531 |
| H | 0.87534 | 3.27418 | -0.99486 |
| H | 1.64071 | 4.23108 | -2.27138 |
| H | 4.85453 | 2.16183 | -2.1214  |
| H | 4.19977 | 3.76076 | -2.49718 |
| H | 4.89342 | 3.65525 | 0.08449  |
| H | 2.33336 | 4.38362 | 0.58463  |
| H | 3.14731 | 5.20182 | -0.75009 |
| C | 2.13399 | 1.85791 | -3.30564 |
| H | 2.73666 | 1.03492 | -3.71414 |
| H | 1.0894  | 1.51832 | -3.23226 |
| H | 2.16395 | 2.69191 | -4.02431 |
| C | 2.86388 | 2.15601 | 1.65061  |
| H | 1.88452 | 2.62768 | 1.54281  |
| H | 2.74735 | 1.22957 | 2.23063  |
| H | 3.48884 | 2.83613 | 2.25055  |
| C | 4.84563 | 1.09994 | 0.71733  |
| H | 5.66826 | 1.1812  | -0.00319 |
| H | 5.22833 | 1.51275 | 1.66303  |
| H | 4.62951 | 0.03452 | 0.88013  |

Optimized reductive elimination transition structure of the active catalyst system (MeCu • BIFOP-H • chalcone) of the reaction pathway (B3LYP-D3(BJ)/def2-SVP)**TS-5 (R)**

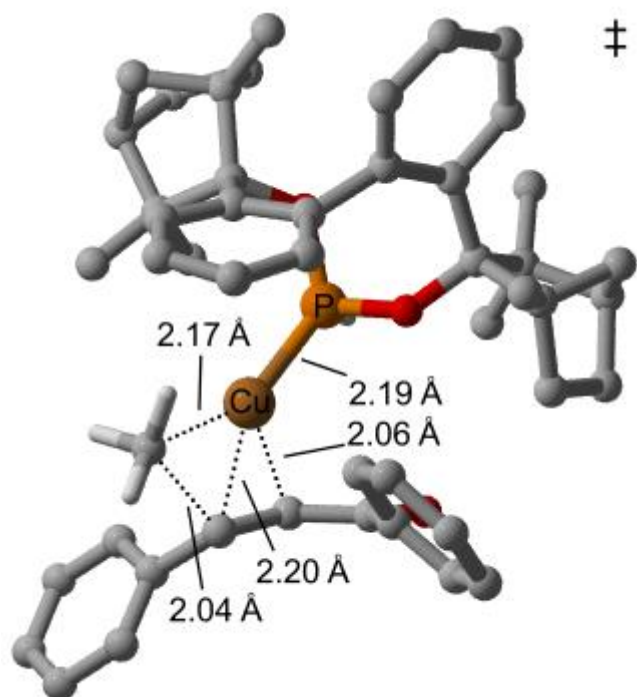

Imaginary frequency:  $-402.55 \text{ cm}^{-1}$

Energy:  $-4068.823835$

Energy (M06-2X-D3/def2-TZVP//B3LYP-D3(BJ)/def2-SVP):  $-4070.161423$

0 1

|    |          |          |          |
|----|----------|----------|----------|
| Cu | -1.78138 | 0.31402  | -0.02893 |
| C  | -3.19624 | 0.92483  | 1.4931   |
| H  | -2.23348 | 0.96937  | 2.03456  |
| H  | -3.49691 | 1.9273   | 1.16551  |
| H  | -3.93877 | 0.54009  | 2.19707  |
| C  | -3.04614 | -1.00505 | -0.98341 |
| H  | -3.23479 | -0.60696 | -1.98429 |
| C  | -3.83006 | -0.46832 | 0.13773  |
| C  | -2.3109  | -2.2397  | -0.9808  |
| O  | -1.83916 | -2.74783 | -2.01155 |
| H  | -3.99623 | -1.20677 | 0.92495  |

|   |          |          |          |
|---|----------|----------|----------|
| C | -2.08618 | -2.97937 | 0.3246   |
| C | -2.25948 | -4.37186 | 0.3304   |
| C | -1.60694 | -2.36046 | 1.48663  |
| C | -1.99252 | -5.11904 | 1.47728  |
| H | -2.58666 | -4.8565  | -0.5914  |
| C | -1.31714 | -3.10672 | 2.63145  |
| H | -1.39708 | -1.28759 | 1.50139  |
| C | -1.51873 | -4.48864 | 2.63388  |
| H | -2.14204 | -6.20175 | 1.46864  |
| H | -0.92491 | -2.6039  | 3.51866  |
| H | -1.29817 | -5.07497 | 3.52928  |
| C | -5.08056 | 0.2581   | -0.24114 |
| C | -6.30893 | -0.11866 | 0.31691  |
| C | -5.05988 | 1.3147   | -1.16612 |
| C | -7.49111 | 0.53263  | -0.04833 |
| H | -6.33964 | -0.93816 | 1.03985  |
| C | -6.23611 | 1.96796  | -1.53032 |
| H | -4.10691 | 1.63255  | -1.59698 |
| C | -7.45941 | 1.57776  | -0.97329 |
| H | -8.44059 | 0.21973  | 0.39304  |
| H | -6.2003  | 2.78822  | -2.2516  |
| H | -8.38168 | 2.08924  | -1.25864 |
| C | -0.29012 | 1.8532   | 3.55996  |
| C | 0.14309  | 2.52953  | 2.41872  |
| C | 0.08559  | 0.52743  | 3.74969  |
| C | 0.94908  | 1.94015  | 1.43372  |
| C | 1.00101  | -0.03716 | 2.86327  |
| C | 1.49848  | 0.64631  | 1.74066  |
| O | 1.39913  | 1.5434   | -0.85814 |

|   |          |          |          |
|---|----------|----------|----------|
| O | 0.921    | -1.01909 | -0.50247 |
| C | 2.83393  | 0.11632  | 1.24404  |
| C | 3.82476  | 0.45062  | 2.19386  |
| P | 0.21571  | 0.37787  | -0.93128 |
| C | 3.22431  | -0.64305 | 0.10238  |
| C | 5.17869  | 0.19375  | 2.01834  |
| C | 4.60971  | -0.81792 | -0.0814  |
| C | 5.57826  | -0.40526 | 0.83012  |
| H | 4.9643   | -1.33578 | -0.95936 |
| H | 6.63345  | -0.58901 | 0.61536  |
| H | 5.9009   | 0.48579  | 2.78365  |
| H | 3.50366  | 0.97285  | 3.09609  |
| H | 1.40394  | -1.02746 | 3.07229  |
| H | -0.27601 | -0.04489 | 4.60691  |
| H | -0.93955 | 2.36224  | 4.2751   |
| H | -0.18519 | 3.55234  | 2.29123  |
| H | 0.17165  | 0.31968  | -2.33358 |
| C | 1.19794  | 2.63062  | 0.06675  |
| C | 2.44689  | 3.59725  | 0.04541  |
| C | 0.03963  | 3.631    | -0.57038 |
| C | 2.81231  | 3.89831  | -1.43679 |
| C | 1.78068  | 4.91829  | 0.48051  |
| C | 0.80624  | 4.98499  | -0.69512 |
| C | 1.78394  | 4.96785  | -1.87996 |
| H | 2.77731  | 2.98334  | -2.04134 |
| H | 3.84207  | 4.28166  | -1.48518 |
| H | 1.30407  | 4.85913  | 1.46926  |
| H | 2.49966  | 5.752    | 0.49896  |
| H | 0.11319  | 5.83924  | -0.70732 |

|   |          |          |          |
|---|----------|----------|----------|
| H | 1.30919  | 4.74962  | -2.84476 |
| H | 2.25731  | 5.95728  | -1.97578 |
| C | 3.66585  | 3.20805  | 0.85613  |
| H | 3.41573  | 3.00772  | 1.90544  |
| H | 4.16525  | 2.32462  | 0.44142  |
| H | 4.38737  | 4.04067  | 0.83615  |
| C | -1.25189 | 3.86865  | 0.22928  |
| H | -1.69136 | 2.9315   | 0.5886   |
| H | -1.12545 | 4.54808  | 1.08117  |
| H | -1.98715 | 4.34533  | -0.43747 |
| C | -0.43962 | 3.14531  | -1.95208 |
| H | -1.17578 | 2.33095  | -1.8529  |
| H | -0.96274 | 3.97303  | -2.45462 |
| H | 0.36484  | 2.80188  | -2.60936 |
| C | 2.25259  | -1.51446 | -0.72775 |
| C | 2.28736  | -2.99027 | -0.12324 |
| C | 2.55274  | -1.82452 | -2.30057 |
| C | 1.10534  | -3.79444 | -0.73622 |
| C | 3.47744  | -3.60058 | -0.88694 |
| C | 2.88251  | -3.3606  | -2.27941 |
| C | 1.59297  | -4.19091 | -2.14932 |
| H | 0.1853   | -3.21062 | -0.77742 |
| H | 0.89826  | -4.67129 | -0.10616 |
| H | 4.44256  | -3.12444 | -0.69064 |
| H | 3.58588  | -4.67214 | -0.65765 |
| H | 3.51322  | -3.64212 | -3.13632 |
| H | 0.83777  | -4.00032 | -2.91965 |
| H | 1.84811  | -5.26084 | -2.20419 |
| C | 2.32191  | -3.09058 | 1.3917   |

|   |         |          |          |
|---|---------|----------|----------|
| H | 3.18547 | -2.57702 | 1.83644  |
| H | 1.39842 | -2.67936 | 1.82112  |
| H | 2.36881 | -4.15122 | 1.68352  |
| C | 1.34239 | -1.58674 | -3.22804 |
| H | 0.37395 | -1.88783 | -2.81015 |
| H | 1.28857 | -0.53771 | -3.54881 |
| H | 1.50265 | -2.17617 | -4.14395 |
| C | 3.70719 | -1.02642 | -2.93924 |
| H | 4.70362 | -1.42975 | -2.72019 |
| H | 3.59995 | -1.06589 | -4.03393 |
| H | 3.6863  | 0.03138  | -2.63672 |

Optimized reductive elimination transition structure of the active catalyst system (MeCu • BIFOP-H • chalcone) of the reaction pathway (B3LYP-D3(BJ)/def2-SVP)**TS-7.2 (R)**

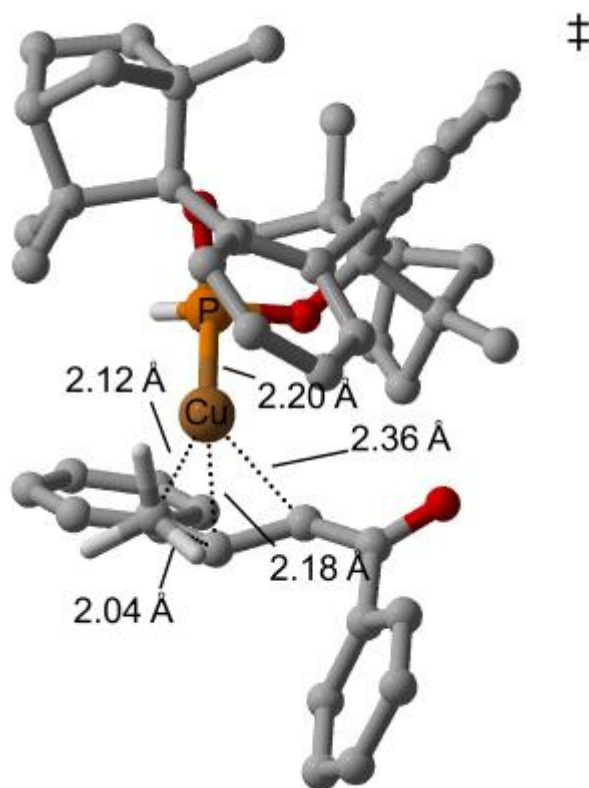

Imaginary frequency:  $-465.11 \text{ cm}^{-1}$

Energy: -4068.813130

Energy (M06-2X-D3/def2-TZVP//B3LYP-D3(BJ)/def2-SVP): -4070.152474

0 1

|    |          |          |          |
|----|----------|----------|----------|
| Cu | -1.30965 | -0.90626 | 0.5831   |
| C  | -3.07884 | -2.03909 | 0.83436  |
| H  | -3.86158 | -1.9455  | 0.07425  |
| H  | -2.26995 | -2.67131 | 0.39375  |
| H  | -3.45501 | -2.56482 | 1.71925  |
| C  | -2.8537  | 0.86346  | 0.30906  |
| H  | -1.91456 | 1.41917  | 0.36421  |
| C  | -3.15399 | -0.07008 | 1.38109  |
| C  | -3.51111 | 1.00506  | -0.94693 |
| O  | -2.99342 | 1.59278  | -1.92053 |
| H  | -4.20581 | -0.30081 | 1.55477  |
| C  | -4.88004 | 0.39873  | -1.16373 |
| C  | -5.16653 | -0.16177 | -2.4182  |
| C  | -5.89632 | 0.43192  | -0.19681 |
| C  | -6.41305 | -0.73071 | -2.68079 |
| H  | -4.39265 | -0.11683 | -3.18675 |
| C  | -7.15243 | -0.12048 | -0.46163 |
| H  | -5.71203 | 0.92728  | 0.75851  |
| C  | -7.40962 | -0.71816 | -1.69875 |
| H  | -6.61542 | -1.17526 | -3.65883 |
| H  | -7.93719 | -0.07609 | 0.29808  |
| H  | -8.38929 | -1.15723 | -1.90357 |
| C  | -2.4037  | 0.16169  | 2.68286  |
| C  | -2.15273 | -0.86638 | 3.61124  |
| C  | -1.91149 | 1.44523  | 2.98498  |

|   |          |          |          |
|---|----------|----------|----------|
| C | -1.41065 | -0.63035 | 4.76919  |
| H | -2.51516 | -1.87383 | 3.40919  |
| C | -1.16599 | 1.68336  | 4.14322  |
| H | -2.12014 | 2.26311  | 2.29701  |
| C | -0.90221 | 0.64515  | 5.0382   |
| H | -1.22198 | -1.45263 | 5.46382  |
| H | -0.7906  | 2.69059  | 4.34063  |
| H | -0.31112 | 0.82591  | 5.939    |
| C | -1.08796 | -2.90771 | -2.26679 |
| C | 0.12872  | -3.04345 | -1.59128 |
| C | -1.58398 | -1.63398 | -2.52628 |
| C | 0.90474  | -1.94609 | -1.19372 |
| C | -0.75944 | -0.5304  | -2.29321 |
| C | 0.52247  | -0.66433 | -1.72897 |
| O | 2.09149  | -0.77427 | 0.50478  |
| O | 0.66878  | 1.36695  | 0.40614  |
| C | 1.50833  | 0.41031  | -2.1613  |
| C | 1.82319  | 0.14792  | -3.5177  |
| P | 0.68496  | -0.10963 | 1.06878  |
| C | 2.10669  | 1.53899  | -1.53808 |
| C | 2.74844  | 0.87469  | -4.25159 |
| C | 3.07155  | 2.22953  | -2.30177 |
| C | 3.40972  | 1.91757  | -3.61295 |
| H | 3.57093  | 3.08323  | -1.87099 |
| H | 4.16605  | 2.51139  | -4.13118 |
| H | 2.95348  | 0.61756  | -5.29286 |
| H | 1.32342  | -0.69541 | -3.99635 |
| H | -1.10754 | 0.46022  | -2.59218 |
| H | -2.57789 | -1.48748 | -2.94998 |



|   |          |          |          |
|---|----------|----------|----------|
| H | -1.66098 | -3.79868 | -2.53175 |
| H | 0.4557   | -4.04437 | -1.33886 |
| H | 1.07152  | 0.15142  | 2.40075  |
| C | 2.03272  | -2.06998 | -0.13686 |
| C | 3.44727  | -2.4271  | -0.73233 |
| C | 1.89333  | -3.20904 | 1.04879  |
| C | 4.52815  | -2.13618 | 0.34697  |
| C | 3.37593  | -3.96756 | -0.69344 |
| C | 3.17749  | -4.06693 | 0.82078  |
| C | 4.43381  | -3.33672 | 1.3222   |
| H | 4.35035  | -1.16751 | 0.83048  |
| H | 5.51516  | -2.08373 | -0.13576 |
| H | 2.55156  | -4.37975 | -1.29223 |
| H | 4.31282  | -4.42961 | -1.04159 |
| H | 3.06393  | -5.08096 | 1.23182  |
| H | 4.38306  | -3.04289 | 2.37814  |
| H | 5.30639  | -4.00008 | 1.21881  |
| C | 3.80729  | -1.83254 | -2.07979 |
| H | 3.05607  | -2.06666 | -2.84454 |
| H | 3.91679  | -0.74177 | -2.02875 |
| H | 4.7701   | -2.25211 | -2.41287 |
| C | 0.66457  | -4.13572 | 1.04343  |
| H | -0.2733  | -3.57317 | 0.94692  |
| H | 0.69498  | -4.90941 | 0.26727  |
| H | 0.63414  | -4.66609 | 2.00769  |
| C | 1.88566  | -2.57071 | 2.45063  |
| H | 0.89511  | -2.15141 | 2.68934  |
| H | 2.07633  | -3.35715 | 3.19693  |
| H | 2.63477  | -1.78497 | 2.58797  |

|   |          |         |          |
|---|----------|---------|----------|
| C | 1.63422  | 2.21172 | -0.23074 |
| C | 0.8233   | 3.54407 | -0.58188 |
| C | 2.74692  | 2.7667  | 0.81563  |
| C | 0.01531  | 3.95566 | 0.68128  |
| C | 1.92922  | 4.61903 | -0.5359  |
| C | 2.39292  | 4.28884 | 0.88878  |
| C | 1.07882  | 4.52165 | 1.65863  |
| H | -0.54769 | 3.11387 | 1.09134  |
| H | -0.71428 | 4.72487 | 0.38918  |
| H | 2.69773  | 4.5354  | -1.30984 |
| H | 1.49896  | 5.62972 | -0.61505 |
| H | 3.24001  | 4.87679 | 1.27349  |
| H | 1.05554  | 4.04939 | 2.64899  |
| H | 0.93765  | 5.6013  | 1.82039  |
| C | -0.04945 | 3.46885 | -1.82481 |
| H | 0.5267   | 3.21912 | -2.72665 |
| H | -0.86365 | 2.73518 | -1.7117  |
| H | -0.52568 | 4.44781 | -1.99419 |
| C | 2.64822  | 2.11573 | 2.20263  |
| H | 1.63085  | 2.08663 | 2.60345  |
| H | 3.05152  | 1.09306 | 2.18542  |
| H | 3.26305  | 2.69723 | 2.9074   |
| C | 4.22244  | 2.58699 | 0.40533  |
| H | 4.56611  | 3.30574 | -0.34779 |
| H | 4.85435  | 2.74709 | 1.29234  |
| H | 4.41956  | 1.57248 | 0.03049  |

Optimized reductive elimination transition structure of the active catalyst system (MeCu • BIFOP-H • chalcone) of the reaction pathway (B3LYP-D3(BJ)/def2-SVP)**TS-2 (S)**

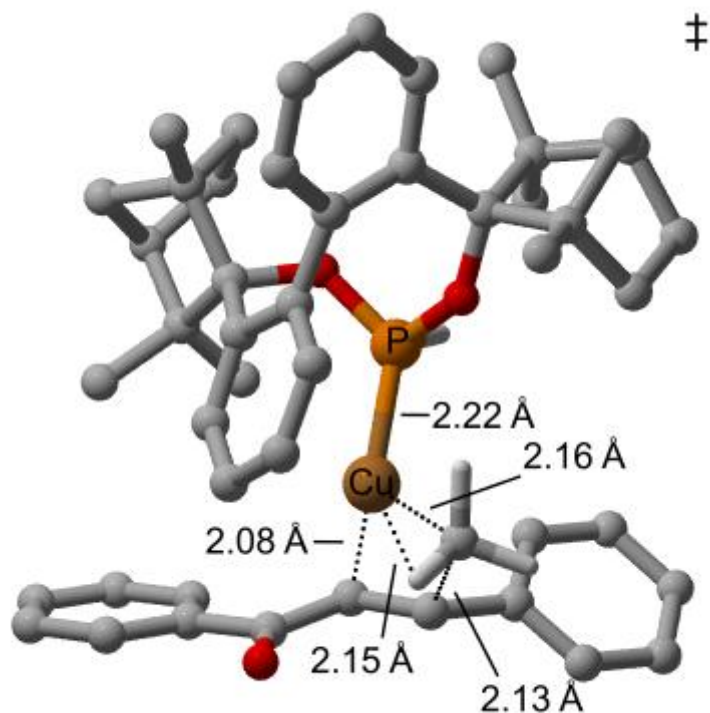

Imaginary frequency:  $-368.08 \text{ cm}^{-1}$

Energy:  $-4068.831421$

Energy (M06-2X-D3/def2-TZVP//B3LYP-D3(BJ)/def2-SVP):  $-4070.165928$

0 1

|    |          |          |         |
|----|----------|----------|---------|
| Cu | 1.38017  | 1.05005  | 0.56085 |
| C  | 0.95796  | 2.58669  | 2.01743 |
| H  | -0.02842 | 2.09881  | 1.93159 |
| H  | 1.44998  | 2.29561  | 2.95094 |
| H  | 0.81149  | 3.66845  | 1.95657 |
| C  | 3.34226  | 1.6056   | 0.15903 |
| C  | 2.67081  | 2.75397  | 0.76859 |
| C  | 1.60122  | -0.85438 | 2.71726 |
| C  | 1.36788  | -1.53053 | 1.51728 |
| C  | 0.51845  | -0.39255 | 3.4598  |
| C  | 0.07991  | -1.7942  | 0.99811 |

|   |          |          |          |
|---|----------|----------|----------|
| C | -0.7608  | -0.59439 | 2.96244  |
| C | -1.01812 | -1.25079 | 1.74007  |
| O | -0.65908 | -1.15671 | -1.14321 |
| O | -1.72925 | 0.90558  | -0.02943 |
| C | -2.49611 | -1.43587 | 1.50237  |
| C | -3.02251 | -2.36892 | 2.42591  |
| P | -0.3324  | 0.38576  | -0.6844  |
| C | -3.39313 | -0.7605  | 0.62631  |
| C | -4.35285 | -2.75725 | 2.45245  |
| C | -4.72591 | -1.22755 | 0.64094  |
| C | -5.20882 | -2.20332 | 1.5056   |
| H | -5.44894 | -0.78446 | -0.02516 |
| H | -6.25977 | -2.49653 | 1.45288  |
| H | -4.70312 | -3.49189 | 3.18045  |
| H | -2.32415 | -2.82804 | 3.12705  |
| H | -1.61785 | -0.22357 | 3.52523  |
| H | 0.66901  | 0.14427  | 4.39821  |
| H | 2.62629  | -0.6545  | 3.02929  |
| H | 2.24084  | -1.84781 | 0.96874  |
| H | -0.35467 | 0.91716  | -1.99416 |
| C | -0.05498 | -2.3051  | -0.4622  |
| C | -0.98111 | -3.58233 | -0.80448 |
| C | 1.28329  | -2.65833 | -1.31751 |
| C | -1.65869 | -3.28034 | -2.16313 |
| C | 0.02697  | -4.6484  | -1.28973 |
| C | 0.7233   | -3.73471 | -2.29123 |
| C | -0.46453 | -3.24285 | -3.15209 |
| H | -2.24803 | -2.35927 | -2.14778 |
| H | -2.34138 | -4.11356 | -2.39173 |

|   |          |          |          |
|---|----------|----------|----------|
| H | 0.67321  | -5.05271 | -0.50188 |
| H | -0.50862 | -5.49121 | -1.75285 |
| H | 1.53387  | -4.17833 | -2.88697 |
| H | -0.2971  | -2.24012 | -3.56717 |
| H | -0.61903 | -3.9241  | -4.0027  |
| C | -1.94274 | -4.14544 | 0.22586  |
| H | -1.50015 | -4.18615 | 1.22995  |
| H | -2.88001 | -3.58588 | 0.27575  |
| H | -2.19693 | -5.17747 | -0.06528 |
| C | 2.44999  | -3.34913 | -0.55266 |
| H | 3.24244  | -2.6443  | -0.27754 |
| H | 2.14157  | -3.88169 | 0.35458  |
| H | 2.9222   | -4.08471 | -1.22113 |
| C | 1.87851  | -1.45901 | -2.05857 |
| H | 2.19984  | -0.67284 | -1.35986 |
| H | 2.77467  | -1.78437 | -2.6074  |
| H | 1.18287  | -1.01817 | -2.78337 |
| C | -3.12691 | 0.59044  | -0.09232 |
| C | -3.81152 | 1.76486  | 0.75558  |
| C | -3.77761 | 0.84331  | -1.5655  |
| C | -3.21174 | 3.11907  | 0.27763  |
| C | -5.21132 | 1.85954  | 0.1201   |
| C | -4.69934 | 2.08246  | -1.30892 |
| C | -3.87389 | 3.3663   | -1.10332 |
| H | -2.11763 | 3.09493  | 0.24187  |
| H | -3.49713 | 3.89772  | 1.00059  |
| H | -5.84389 | 0.97801  | 0.25973  |
| H | -5.76789 | 2.7269   | 0.50872  |
| H | -5.46802 | 2.17377  | -2.09093 |

|   |          |          |          |
|---|----------|----------|----------|
| H | -3.15104 | 3.56457  | -1.90416 |
| H | -4.55163 | 4.233    | -1.06976 |
| C | -3.72697 | 1.60122  | 2.26393  |
| H | -4.21848 | 0.68481  | 2.6185   |
| H | -2.67539 | 1.57725  | 2.58718  |
| H | -4.20822 | 2.45906  | 2.75927  |
| C | -2.73389 | 1.1598   | -2.64429 |
| H | -2.01957 | 1.93266  | -2.34795 |
| H | -2.17949 | 0.25649  | -2.93548 |
| H | -3.2587  | 1.52702  | -3.54005 |
| C | -4.61531 | -0.30656 | -2.16548 |
| H | -5.63519 | -0.36721 | -1.76689 |
| H | -4.72312 | -0.1317  | -3.24657 |
| H | -4.13314 | -1.28453 | -2.03314 |
| C | 4.10555  | 0.73167  | 1.00165  |
| O | 4.11092  | 0.83549  | 2.24329  |
| H | 3.46094  | 1.58091  | -0.9227  |
| C | 4.86662  | -0.41119 | 0.36967  |
| C | 5.35255  | -1.41612 | 1.22184  |
| C | 5.10018  | -0.53349 | -1.00952 |
| C | 6.02711  | -2.52555 | 0.71138  |
| H | 5.18418  | -1.29303 | 2.2928   |
| C | 5.78439  | -1.6371  | -1.52261 |
| H | 4.75026  | 0.2389   | -1.69482 |
| C | 6.24393  | -2.64162 | -0.66534 |
| H | 6.38934  | -3.30281 | 1.38911  |
| H | 5.95926  | -1.71407 | -2.59874 |
| H | 6.77328  | -3.50832 | -1.06882 |
| H | 3.14949  | 3.07946  | 1.69386  |

|   |         |         |          |
|---|---------|---------|----------|
| C | 2.24982 | 3.86419 | -0.13188 |
| C | 2.43501 | 5.19813 | 0.26281  |
| C | 1.65128 | 3.61945 | -1.38071 |
| C | 2.03328 | 6.25418 | -0.55878 |
| H | 2.90155 | 5.40636 | 1.22904  |
| C | 1.24351 | 4.67118 | -2.20075 |
| H | 1.49896 | 2.58956 | -1.70943 |
| C | 1.43176 | 5.99595 | -1.79292 |
| H | 2.19072 | 7.28493 | -0.23157 |
| H | 0.77725 | 4.45631 | -3.16573 |
| H | 1.113   | 6.82073 | -2.43459 |

Optimized reductive elimination transition structure of the active catalyst system (MeCu • BIFOP-H • chalcone) of the reaction pathway (B3LYP-D3(BJ)/def2-SVP)**TS-7 (S)**

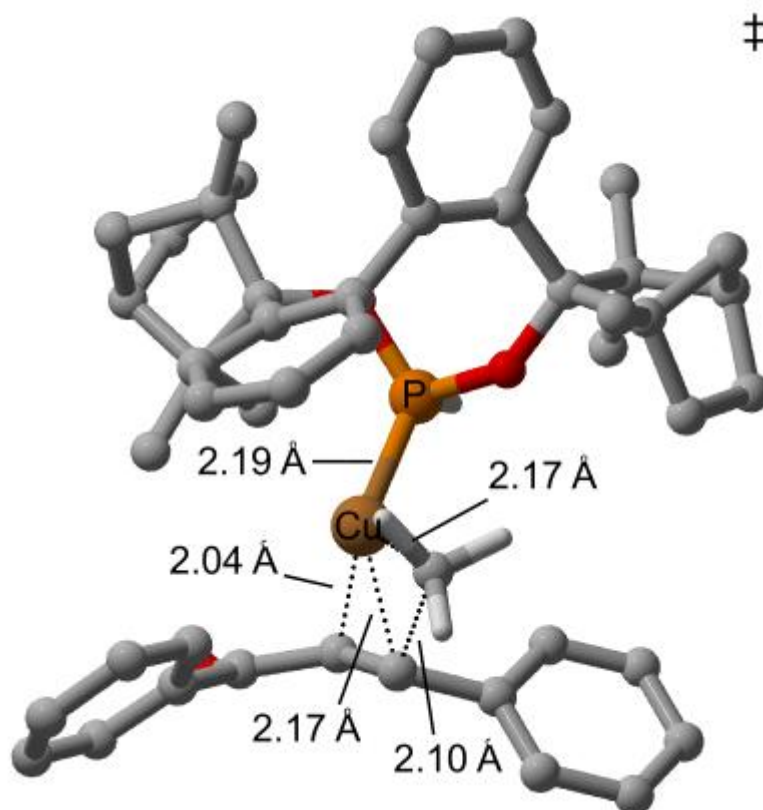

Imaginary frequency:  $-370.94 \text{ cm}^{-1}$

Energy: -4068.820674

Energy (M06-2X-D3/def2-TZVP//B3LYP-D3(BJ)/def2-SVP): -4070.160540

0 1

|    |          |          |          |
|----|----------|----------|----------|
| Cu | 1.43609  | 0.62923  | -0.1934  |
| C  | 1.34259  | 1.8995   | 1.56111  |
| H  | 1.19723  | 0.91797  | 2.04577  |
| H  | 1.92324  | 2.52994  | 2.24051  |
| H  | 0.36999  | 2.36442  | 1.36001  |
| C  | 3.0847   | 1.45365  | -1.06848 |
| C  | 2.75784  | 2.3256   | 0.07017  |
| C  | 1.45384  | -2.03872 | 2.83251  |
| C  | 1.12476  | -2.49683 | 1.55703  |
| C  | 0.58607  | -1.17323 | 3.48752  |
| C  | -0.04746 | -2.12936 | 0.87771  |
| C  | -0.63629 | -0.87726 | 2.88778  |
| C  | -1.01071 | -1.3583  | 1.61981  |
| O  | -1.0997  | -1.47206 | -1.14114 |
| O  | -1.61026 | 0.89776  | -0.09199 |
| C  | -2.52366 | -1.33572 | 1.4201   |
| C  | -3.0874  | -2.32707 | 2.25661  |
| P  | -0.52929 | 0.0677   | -0.97562 |
| C  | -3.41627 | -0.48512 | 0.70122  |
| C  | -4.44823 | -2.58481 | 2.35053  |
| C  | -4.78795 | -0.7946  | 0.79576  |
| C  | -5.3117  | -1.81886 | 1.57751  |
| H  | -5.50196 | -0.19009 | 0.25861  |
| H  | -6.39074 | -1.98774 | 1.59508  |
| H  | -4.81621 | -3.37438 | 3.00909  |



|   |          |          |          |
|---|----------|----------|----------|
| H | -2.40213 | -2.93399 | 2.84826  |
| H | -1.36857 | -0.29466 | 3.44505  |
| H | 0.82701  | -0.76602 | 4.4718   |
| H | 2.39539  | -2.35031 | 3.28795  |
| H | 1.82824  | -3.15895 | 1.07235  |
| H | -0.81258 | 0.47711  | -2.29271 |
| C | -0.25873 | -2.52416 | -0.60705 |
| C | -0.95673 | -3.92522 | -0.80348 |
| C | 1.05216  | -2.69956 | -1.61109 |
| C | -1.46318 | -4.02212 | -2.27181 |
| C | 0.2802   | -4.84638 | -0.83506 |
| C | 0.92028  | -4.18961 | -2.0573  |
| C | -0.19807 | -4.36717 | -3.09534 |
| H | -1.94248 | -3.0853  | -2.58289 |
| H | -2.22237 | -4.81512 | -2.3412  |
| H | 0.88354  | -4.79593 | 0.08214  |
| H | 0.00011  | -5.89849 | -1.0001  |
| H | 1.89     | -4.59576 | -2.37925 |
| H | -0.0736  | -3.74704 | -3.99147 |
| H | -0.21956 | -5.4149  | -3.4332  |
| C | -2.02363 | -4.33741 | 0.19004  |
| H | -1.65809 | -4.29803 | 1.22407  |
| H | -2.91919 | -3.7096  | 0.11181  |
| H | -2.3234  | -5.37684 | -0.01888 |
| C | 2.45885  | -2.47932 | -1.02922 |
| H | 2.5154   | -1.5815  | -0.40184 |
| H | 2.83323  | -3.33045 | -0.44573 |
| H | 3.16897  | -2.31504 | -1.85115 |
| C | 0.978    | -1.75785 | -2.8293  |

|   |          |          |          |
|---|----------|----------|----------|
| H | 1.32128  | -0.74574 | -2.56609 |
| H | 1.68302  | -2.12057 | -3.59146 |
| H | -0.01557 | -1.69372 | -3.28511 |
| C | -3.03051 | 0.86954  | 0.06271  |
| C | -3.357   | 2.04636  | 1.08988  |
| C | -3.81567 | 1.3992   | -1.26941 |
| C | -2.63864 | 3.33666  | 0.59354  |
| C | -4.81677 | 2.37844  | 0.73201  |
| C | -4.52941 | 2.69164  | -0.74086 |
| C | -3.5243  | 3.84568  | -0.57197 |
| H | -1.60329 | 3.1384   | 0.29457  |
| H | -2.60054 | 4.06301  | 1.41852  |
| H | -5.52543 | 1.56407  | 0.91206  |
| H | -5.17618 | 3.25856  | 1.2879   |
| H | -5.39891 | 2.94917  | -1.36398 |
| H | -2.95555 | 4.08644  | -1.47813 |
| H | -4.06749 | 4.76018  | -0.28877 |
| C | -3.05204 | 1.74988  | 2.5473   |
| H | -3.58622 | 0.86433  | 2.91903  |
| H | -1.97285 | 1.59472  | 2.68794  |
| H | -3.34758 | 2.61031  | 3.16787  |
| C | -2.87397 | 1.76847  | -2.42936 |
| H | -1.97264 | 2.3063   | -2.11697 |
| H | -2.57548 | 0.87832  | -2.99885 |
| H | -3.42473 | 2.42012  | -3.12522 |
| C | -4.84541 | 0.43998  | -1.90111 |
| H | -5.81657 | 0.43171  | -1.39158 |
| H | -5.04792 | 0.77161  | -2.931   |
| H | -4.46845 | -0.5919  | -1.94861 |

|   |          |          |          |
|---|----------|----------|----------|
| C | 4.143    | 0.4729   | -1.15111 |
| O | 4.50163  | -0.00109 | -2.23655 |
| H | 2.75479  | 1.77985  | -2.05861 |
| C | 4.85134  | -0.02732 | 0.09426  |
| C | 6.17575  | -0.46917 | -0.06087 |
| C | 4.25298  | -0.14865 | 1.35721  |
| C | 6.89173  | -0.98182 | 1.01974  |
| H | 6.61551  | -0.40954 | -1.05779 |
| C | 4.96219  | -0.67739 | 2.43986  |
| H | 3.21298  | 0.13683  | 1.50764  |
| C | 6.28737  | -1.08638 | 2.27811  |
| H | 7.92518  | -1.31023 | 0.88183  |
| H | 4.47254  | -0.76893 | 3.41274  |
| H | 6.84545  | -1.49262 | 3.12549  |
| H | 3.53897  | 2.37955  | 0.83007  |
| C | 2.1698   | 3.65803  | -0.26299 |
| C | 2.63508  | 4.8189   | 0.36867  |
| C | 1.117    | 3.77954  | -1.18731 |
| C | 2.0689   | 6.066    | 0.08679  |
| H | 3.45219  | 4.74323  | 1.09094  |
| C | 0.54512  | 5.01937  | -1.46527 |
| H | 0.73481  | 2.8853   | -1.68486 |
| C | 1.01933  | 6.17173  | -0.82782 |
| H | 2.45032  | 6.95904  | 0.58807  |
| H | -0.27683 | 5.08824  | -2.18244 |
| H | 0.57217  | 7.14466  | -1.0445  |

Optimized reductive elimination transition structure of the active catalyst system (MeCu • BIFOP-H • chalcone) of the reaction pathway (B3LYP-D3(BJ)/def2-SVP)**TS-8.1 (S)**

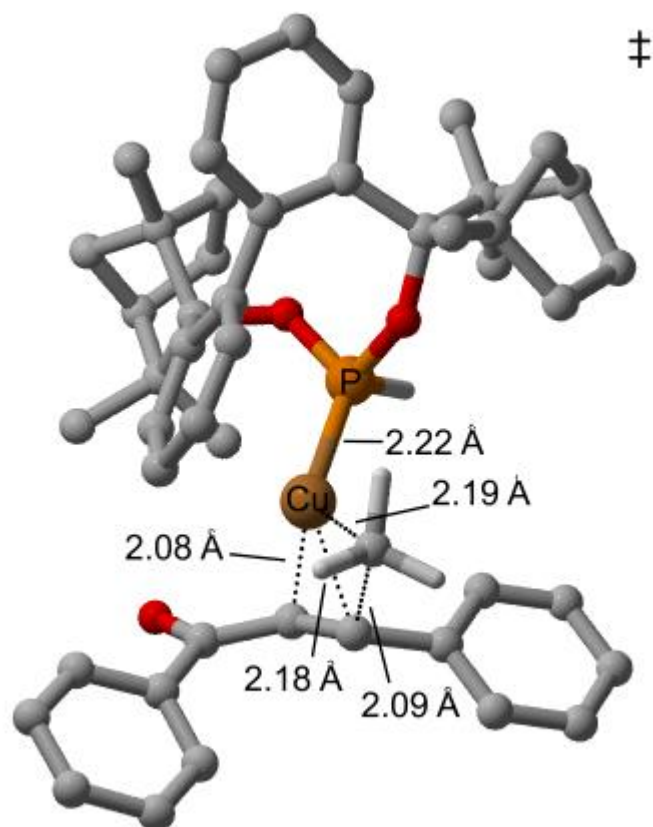

Imaginary frequency:  $-393.41 \text{ cm}^{-1}$

Energy:  $-4068.816126$

Energy (M06-2X-D3/def2-TZVP//B3LYP-D3(BJ)/def2-SVP):  $-4070.152372$

0 1

|    |          |         |          |
|----|----------|---------|----------|
| Cu | -1.55896 | 0.37057 | -0.01411 |
| C  | -2.14403 | 1.78604 | -1.57491 |
| H  | -1.05249 | 1.69446 | -1.71774 |
| H  | -2.67044 | 1.21907 | -2.35195 |
| H  | -2.39716 | 2.84859 | -1.62984 |
| C  | -3.3955  | 0.37158 | 0.97138  |
| C  | -3.3985  | 1.53088 | 0.07227  |
| H  | -4.18959 | 1.53243 | -0.6734  |
| C  | -3.23739 | 2.86702 | 0.72464  |

|   |          |          |          |
|---|----------|----------|----------|
| C | -4.09667 | 3.92113  | 0.38119  |
| C | -2.23981 | 3.10981  | 1.68385  |
| C | -3.96835 | 5.17834  | 0.97782  |
| H | -4.8776  | 3.75199  | -0.36512 |
| C | -2.10498 | 4.36443  | 2.27721  |
| H | -1.55873 | 2.30482  | 1.96519  |
| C | -2.96995 | 5.40666  | 1.92722  |
| H | -4.65236 | 5.98323  | 0.69747  |
| H | -1.31984 | 4.5305   | 3.0192   |
| H | -2.86527 | 6.38961  | 2.39238  |
| H | -3.02449 | 0.51744  | 1.98902  |
| C | -4.00901 | -0.91638 | 0.76905  |
| O | -3.78817 | -1.88251 | 1.51971  |
| C | -4.96269 | -1.15542 | -0.38412 |
| C | -5.93042 | -0.22341 | -0.78824 |
| C | -4.95372 | -2.41818 | -0.99844 |
| C | -6.83026 | -0.52636 | -1.81432 |
| H | -6.01026 | 0.73208  | -0.26774 |
| C | -5.83568 | -2.71755 | -2.03665 |
| H | -4.24768 | -3.16487 | -0.63028 |
| C | -6.77389 | -1.76697 | -2.45427 |
| H | -7.58525 | 0.20724  | -2.10836 |
| H | -5.80299 | -3.70024 | -2.5141  |
| H | -7.4715  | -2.00071 | -3.26232 |
| C | -1.66819 | -1.67245 | -1.91182 |
| C | -1.00771 | -2.10706 | -0.75932 |
| C | -0.94605 | -1.05107 | -2.92674 |
| C | 0.38558  | -1.96763 | -0.55707 |
| C | 0.41435  | -0.85468 | -2.74238 |

|   |          |          |          |
|---|----------|----------|----------|
| C | 1.10052  | -1.2632  | -1.57886 |
| O | 1.35889  | -0.8782  | 1.28259  |
| O | 1.5204   | 1.22246  | -0.18687 |
| C | 2.58472  | -1.02319 | -1.69015 |
| C | 3.14715  | -1.89661 | -2.64971 |
| P | 0.5015   | 0.44323  | 0.8197   |
| C | 3.41501  | -0.02923 | -1.09799 |
| C | 4.49672  | -1.92455 | -2.96478 |
| C | 4.79177  | -0.13246 | -1.39522 |
| C | 5.339    | -1.05123 | -2.28383 |
| H | 5.48304  | 0.56391  | -0.94811 |
| H | 6.41695  | -1.05211 | -2.46058 |
| H | 4.88037  | -2.62927 | -3.70537 |
| H | 2.47705  | -2.60875 | -3.13347 |
| H | 0.99195  | -0.35157 | -3.51812 |
| H | -1.43854 | -0.70099 | -3.83576 |
| H | -2.74422 | -1.81896 | -1.99788 |
| H | -1.61875 | -2.55356 | 0.01142  |
| H | 0.6391   | 1.1359   | 2.04428  |
| C | 0.96861  | -2.22763 | 0.85978  |
| C | 2.26625  | -3.16709 | 1.04736  |
| C | 0.00253  | -2.79417 | 2.04216  |
| C | 3.10999  | -2.52695 | 2.17605  |
| C | 1.72636  | -4.38429 | 1.83149  |
| C | 1.03977  | -3.55941 | 2.91239  |
| C | 2.20023  | -2.67298 | 3.42339  |
| H | 3.39616  | -1.49448 | 1.95657  |
| H | 4.03354  | -3.11724 | 2.28237  |
| H | 1.0603   | -5.03552 | 1.2533   |

|   |          |          |          |
|---|----------|----------|----------|
| H | 2.56357  | -4.99684 | 2.20007  |
| H | 0.53547  | -4.11533 | 3.7153   |
| H | 1.85193  | -1.7034  | 3.80311  |
| H | 2.72291  | -3.17668 | 4.25082  |
| C | 3.10113  | -3.59475 | -0.1463  |
| H | 2.4825   | -3.87636 | -1.00884 |
| H | 3.81463  | -2.82799 | -0.458   |
| H | 3.68691  | -4.48233 | 0.14249  |
| C | -1.07317 | -3.84406 | 1.63345  |
| H | -2.06586 | -3.38621 | 1.52994  |
| H | -0.83736 | -4.39493 | 0.71439  |
| H | -1.15949 | -4.58598 | 2.44222  |
| C | -0.72179 | -1.70136 | 2.8304   |
| H | -1.43763 | -1.15921 | 2.19974  |
| H | -1.32054 | -2.17159 | 3.62494  |
| H | -0.03503 | -0.989   | 3.30449  |
| C | 2.93296  | 1.28873  | -0.43144 |
| C | 3.0708   | 2.47822  | -1.49627 |
| C | 3.77825  | 1.89134  | 0.82582  |
| C | 2.22901  | 3.68371  | -0.98663 |
| C | 4.488    | 3.01252  | -1.21622 |
| C | 4.24193  | 3.28121  | 0.27405  |
| C | 3.06647  | 4.27152  | 0.17957  |
| H | 1.21775  | 3.38382  | -0.69297 |
| H | 2.1291   | 4.40794  | -1.80886 |
| H | 5.29929  | 2.31356  | -1.43937 |
| H | 4.68555  | 3.93536  | -1.78409 |
| H | 5.09894  | 3.66859  | 0.84513  |
| H | 2.49962  | 4.3801   | 1.11238  |

|   |         |         |          |
|---|---------|---------|----------|
| H | 3.452   | 5.27125 | -0.0724  |
| C | 2.72554 | 2.10163 | -2.92733 |
| H | 3.37232 | 1.30661 | -3.3232  |
| H | 1.68093 | 1.7614  | -2.99108 |
| H | 2.83012 | 2.98218 | -3.58046 |
| C | 2.93629 | 2.06704 | 2.09592  |
| H | 1.98838 | 2.58377 | 1.92319  |
| H | 2.7311  | 1.09789 | 2.57201  |
| H | 3.51107 | 2.67186 | 2.81452  |
| C | 5.01105 | 1.08533 | 1.2891   |
| H | 5.90094 | 1.23924 | 0.66684  |
| H | 5.28722 | 1.42165 | 2.29978  |
| H | 4.80703 | 0.00751 | 1.3417   |

Optimized reductive elimination transition structure of the active catalyst system (MeCu • BIFOP-H • cyclohexenone) of the reaction pathway (B3LYP-D3(BJ)/def2-SVP) **TS-9 (R)**

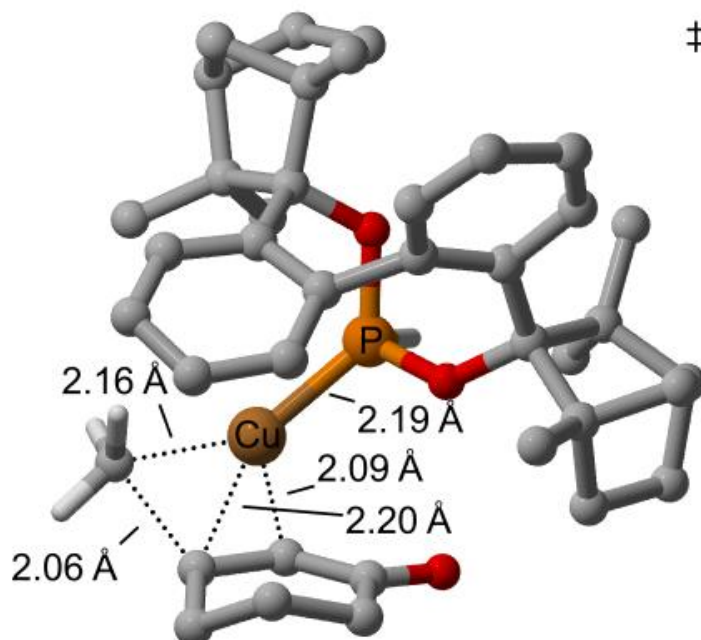

Imaginary frequency:  $-429.13 \text{ cm}^{-1}$

Energy:  $-3723.660165$



Energy (M06-2X-D3/def2-TZVP//B3LYP-D3(BJ)/def2-SVP): -3724.807506

0 1

|    |          |          |          |
|----|----------|----------|----------|
| Cu | -2.10664 | -0.85074 | 0.80099  |
| C  | -3.59083 | -0.49258 | 2.31407  |
| H  | -3.08713 | 0.48694  | 2.20416  |
| H  | -4.67011 | -0.3066  | 2.27127  |
| H  | -3.30757 | -0.90658 | 3.28972  |
| C  | -1.37296 | 2.24463  | 3.28964  |
| C  | -1.25782 | 2.62811  | 1.95278  |
| C  | -0.53559 | 1.2517   | 3.78687  |
| C  | -0.32613 | 2.06598  | 1.06772  |
| C  | 0.49663  | 0.78581  | 2.97413  |
| C  | 0.67734  | 1.21414  | 1.64731  |
| O  | 0.15332  | 1.11818  | -1.05259 |
| O  | 0.76762  | -1.15625 | 0.06266  |
| C  | 2.11201  | 1.0677   | 1.16121  |
| C  | 2.89346  | 2.04072  | 1.8274   |
| P  | -0.475   | -0.34405 | -0.57131 |
| C  | 2.77357  | 0.14894  | 0.29785  |
| C  | 4.2539   | 2.21638  | 1.61614  |
| C  | 4.14634  | 0.3814   | 0.07615  |
| C  | 4.88167  | 1.38778  | 0.69339  |
| H  | 4.6905   | -0.27257 | -0.58743 |
| H  | 5.94525  | 1.49441  | 0.468    |
| H  | 4.80137  | 2.99343  | 2.15385  |
| H  | 2.38384  | 2.70269  | 2.52871  |
| H  | 1.24678  | 0.11657  | 3.3959   |
| H  | -0.63688 | 0.88748  | 4.81144  |

|   |          |          |          |
|---|----------|----------|----------|
| H | -2.13844 | 2.70283  | 3.91929  |
| H | -1.9444  | 3.38089  | 1.58859  |
| H | -0.63168 | -0.88694 | -1.85795 |
| C | -0.41642 | 2.3033   | -0.46288 |
| C | 0.3575   | 3.58267  | -0.96694 |
| C | -1.8979  | 2.55574  | -1.15838 |
| C | 0.50713  | 3.49289  | -2.51305 |
| C | -0.74811 | 4.64786  | -0.81894 |
| C | -1.7272  | 3.97684  | -1.78314 |
| C | -0.87566 | 3.92443  | -3.06127 |
| H | 0.80031  | 2.48068  | -2.81882 |
| H | 1.30421  | 4.17632  | -2.84067 |
| H | -1.11604 | 4.75242  | 0.21137  |
| H | -0.41052 | 5.63858  | -1.16098 |
| H | -2.69772 | 4.47655  | -1.91971 |
| H | -1.27254 | 3.2533   | -3.8331  |
| H | -0.82839 | 4.92951  | -3.50831 |
| C | 1.66905  | 3.92839  | -0.29153 |
| H | 1.55727  | 4.02681  | 0.79546  |
| H | 2.44224  | 3.17718  | -0.49393 |
| H | 2.02864  | 4.89445  | -0.68082 |
| C | -3.14975 | 2.5491   | -0.26304 |
| H | -3.17145 | 1.67855  | 0.40479  |
| H | -3.27222 | 3.4596   | 0.33593  |
| H | -4.03555 | 2.48856  | -0.91429 |
| C | -2.199   | 1.51046  | -2.24998 |
| H | -2.55337 | 0.56717  | -1.80607 |
| H | -3.02271 | 1.88344  | -2.87752 |
| H | -1.3492  | 1.285    | -2.90109 |

|   |          |          |          |
|---|----------|----------|----------|
| C | 2.17892  | -1.19498 | -0.1797  |
| C | 2.71522  | -2.36669 | 0.76051  |
| C | 2.5647   | -1.77351 | -1.65421 |
| C | 1.8284   | -3.62302 | 0.51808  |
| C | 4.00544  | -2.79036 | 0.03405  |
| C | 3.31338  | -3.10328 | -1.29836 |
| C | 2.32247  | -4.18805 | -0.83693 |
| H | 0.75798  | -3.39437 | 0.49015  |
| H | 1.99912  | -4.33502 | 1.34001  |
| H | 4.78652  | -2.02421 | -0.00578 |
| H | 4.44685  | -3.68609 | 0.4987   |
| H | 3.96869  | -3.42028 | -2.12388 |
| H | 1.49544  | -4.37918 | -1.52928 |
| H | 2.86377  | -5.13804 | -0.7048  |
| C | 2.82862  | -2.01707 | 2.23442  |
| H | 3.49359  | -1.16185 | 2.42075  |
| H | 1.83595  | -1.78457 | 2.64783  |
| H | 3.22319  | -2.88234 | 2.78975  |
| C | 1.3458   | -2.08691 | -2.53875 |
| H | 0.5305   | -2.60868 | -2.02514 |
| H | 0.95881  | -1.17185 | -3.01065 |
| H | 1.68511  | -2.7409  | -3.35774 |
| C | 3.46389  | -0.87384 | -2.5266  |
| H | 4.52756  | -0.91227 | -2.26092 |
| H | 3.39908  | -1.22343 | -3.56815 |
| H | 3.13762  | 0.17631  | -2.50449 |
| O | -1.15458 | -3.792   | -0.97093 |
| C | -2.19937 | -3.23658 | -0.59502 |
| C | -2.50698 | -2.92457 | 0.77173  |

|   |          |          |          |
|---|----------|----------|----------|
| H | -1.86447 | -3.38511 | 1.52898  |
| C | -3.71228 | -2.22225 | 1.21145  |
| H | -4.1544  | -2.63722 | 2.12161  |
| C | -3.26663 | -2.8772  | -1.63904 |
| H | -3.16125 | -3.60127 | -2.4604  |
| H | -3.03013 | -1.88439 | -2.06901 |
| C | -4.67544 | -2.86519 | -1.04744 |
| H | -4.93407 | -3.88068 | -0.70157 |
| H | -5.42243 | -2.58691 | -1.80954 |
| C | -4.74347 | -1.88529 | 0.12434  |
| H | -5.75071 | -1.85706 | 0.56909  |
| H | -4.5636  | -0.87015 | -0.26982 |

Optimized reductive elimination transition structure of the active catalyst system (MeCu • BIFOP-H • cyclohexenone) of the reaction pathway (B3LYP-D3(BJ)/def2-SVP)**TS-10 (S)**

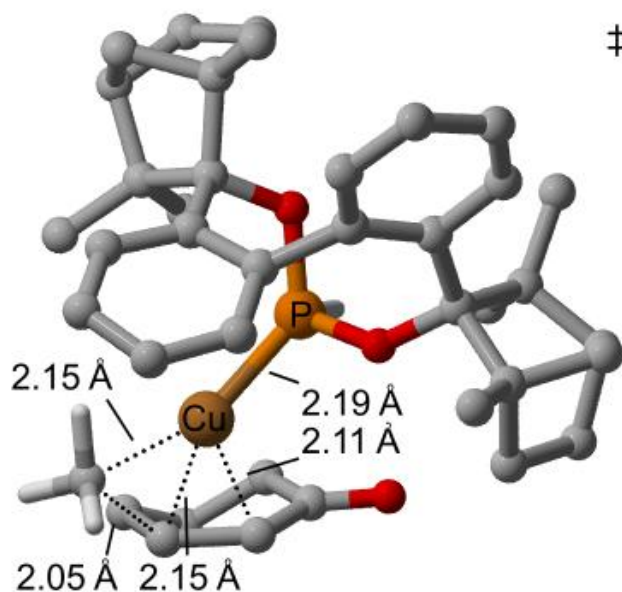

Imaginary frequency:  $-463.18 \text{ cm}^{-1}$

Energy:  $-3723.656037$

Energy (M06-2X-D3/def2-TZVP//B3LYP-D3(BJ)/def2-SVP):  $-3724.802586$

|     |          |          |          |
|-----|----------|----------|----------|
| 0 1 |          |          |          |
| Cu  | 0.20455  | -2.53549 | -0.41386 |
| C   | -0.70915 | -4.33202 | 0.35015  |
| H   | -1.36935 | -4.52884 | -0.50773 |
| H   | -0.5655  | -5.26368 | 0.90397  |
| H   | -1.18422 | -3.61897 | 1.04524  |
| C   | -2.03879 | -1.98493 | 2.92006  |
| C   | -2.59622 | -1.33208 | 1.81814  |
| C   | -0.77661 | -1.61112 | 3.36857  |
| C   | -1.94558 | -0.30014 | 1.12845  |
| C   | -0.17943 | -0.48351 | 2.80517  |
| C   | -0.75784 | 0.23187  | 1.74449  |
| O   | -1.23737 | 0.63008  | -0.93181 |
| O   | 1.26415  | 0.36203  | -0.28807 |
| C   | -0.318   | 1.68122  | 1.6599   |
| C   | -0.85123 | 2.37045  | 2.773    |
| P   | 0.04244  | -0.43094 | -1.00773 |
| C   | 0.47862  | 2.41005  | 0.732    |
| C   | -0.75604 | 3.74545  | 2.94364  |
| C   | 0.47209  | 3.81123  | 0.88314  |
| C   | -0.1327  | 4.48158  | 1.94324  |
| H   | 0.99291  | 4.42305  | 0.16283  |
| H   | -0.0801  | 5.57164  | 1.99124  |
| H   | -1.1966  | 4.22681  | 3.81924  |
| H   | -1.40629 | 1.78742  | 3.50934  |
| H   | 0.74113  | -0.09122 | 3.23904  |
| H   | -0.28736 | -2.14222 | 4.18784  |
| H   | -2.58499 | -2.80253 | 3.39513  |

|   |          |          |          |
|---|----------|----------|----------|
| H | -3.56586 | -1.66858 | 1.47604  |
| H | 0.2979   | -0.26404 | -2.37976 |
| C | -2.43735 | 0.20457  | -0.25444 |
| C | -3.46907 | 1.40062  | -0.18732 |
| C | -3.24367 | -0.82858 | -1.26704 |
| C | -3.53687 | 2.07038  | -1.58936 |
| C | -4.79787 | 0.61932  | -0.14838 |
| C | -4.5951  | -0.08256 | -1.49041 |
| C | -4.4278  | 1.12195  | -2.42898 |
| H | -2.53205 | 2.20761  | -2.00752 |
| H | -3.98895 | 3.0683   | -1.49076 |
| H | -4.87708 | -0.05773 | 0.71463  |
| H | -5.66797 | 1.29397  | -0.13343 |
| H | -5.38904 | -0.77686 | -1.80312 |
| H | -3.99859 | 0.86475  | -3.4056  |
| H | -5.41332 | 1.57257  | -2.62392 |
| C | -3.31232 | 2.42485  | 0.91817  |
| H | -3.26661 | 1.95792  | 1.90992  |
| H | -2.41655 | 3.04113  | 0.77968  |
| H | -4.18475 | 3.0979   | 0.90419  |
| C | -3.55574 | -2.25248 | -0.77907 |
| H | -2.67534 | -2.74949 | -0.3604  |
| H | -4.37059 | -2.2967  | -0.04545 |
| H | -3.89023 | -2.84442 | -1.64518 |
| C | -2.49229 | -1.02449 | -2.59644 |
| H | -1.65901 | -1.736   | -2.47751 |
| H | -3.18056 | -1.47359 | -3.3287  |
| H | -2.09618 | -0.09904 | -3.02501 |
| C | 1.54599  | 1.76894  | -0.18732 |

|   |         |          |          |
|---|---------|----------|----------|
| C | 2.95242 | 1.86954  | 0.55523  |
| C | 1.90443 | 2.46565  | -1.6113  |
| C | 3.99098 | 1.01177  | -0.22886 |
| C | 3.40734 | 3.28601  | 0.1579   |
| C | 3.35338 | 3.02354  | -1.3544  |
| C | 4.38901 | 1.88993  | -1.44067 |
| H | 3.59952 | 0.04302  | -0.55263 |
| H | 4.85188 | 0.81218  | 0.42699  |
| H | 2.77568 | 4.09633  | 0.52997  |
| H | 4.43284 | 3.48431  | 0.50672  |
| H | 3.57078 | 3.88229  | -2.00748 |
| H | 4.38602 | 1.33297  | -2.38416 |
| H | 5.39827 | 2.31385  | -1.32162 |
| C | 2.92252 | 1.53542  | 2.03725  |
| H | 2.27297 | 2.20974  | 2.61255  |
| H | 2.57144 | 0.5033   | 2.18796  |
| H | 3.93948 | 1.60462  | 2.45366  |
| C | 1.94262 | 1.46882  | -2.78757 |
| H | 2.38258 | 0.49423  | -2.54377 |
| H | 0.93754 | 1.31544  | -3.20278 |
| H | 2.54281 | 1.91735  | -3.59403 |
| C | 0.95327 | 3.58859  | -2.07262 |
| H | 1.15245 | 4.56288  | -1.61012 |
| H | 1.08042 | 3.73704  | -3.15584 |
| H | -0.0994 | 3.32605  | -1.88953 |
| O | 3.4263  | -1.82763 | -1.68881 |
| C | 1.86046 | -3.52961 | -1.19982 |
| H | 1.66182 | -3.65489 | -2.26938 |
| C | 2.88523 | -2.5773  | -0.86309 |

|   |         |          |          |
|---|---------|----------|----------|
| C | 3.34804 | -2.52814 | 0.60033  |
| H | 3.51065 | -1.47621 | 0.87145  |
| H | 4.34266 | -3.00873 | 0.62596  |
| C | 2.40303 | -3.21232 | 1.58723  |
| H | 1.49552 | -2.5922  | 1.7269   |
| H | 2.87002 | -3.29021 | 2.58274  |
| C | 1.98364 | -4.58849 | 1.07502  |
| H | 1.3718  | -5.12024 | 1.81835  |
| H | 2.88677 | -5.20213 | 0.90001  |
| C | 1.25538 | -4.46272 | -0.25198 |
| H | 0.97465 | -5.42011 | -0.70086 |

## Computed reaction pathways of the MeCu-catalyzed 1,4-addition

### Full-optimized structures (B3LYP-D3(BJ)/def2-SVP)

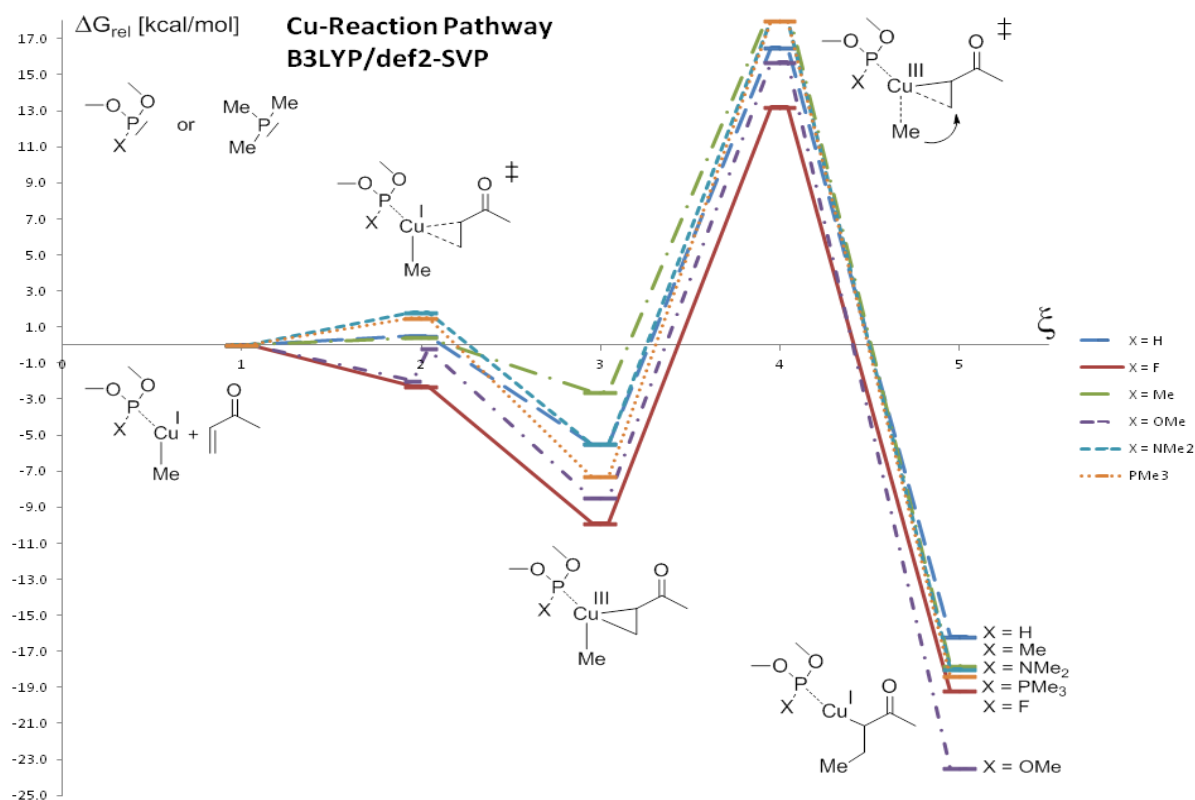



## Energy Table 1 of full-optimized structures (B3LYP-D3(BJ)/def2-SVP)

**Energy Table 1.** Computed reaction pathway of the MeCu-catalyzed 1,4-addition to methyl-vinyl ketone with six different phosphorus ligands (T = 293.15 K, B3LYP-D3(BJ)/def2-SVP, solvent = diethylether, ZPE scaled by 0.9912 for B3LYP-D3(BJ)/def2-SVP [1].

| (MeO) <sub>2</sub> P-X or<br>PMe <sub>3</sub> | E <sub>a</sub> [kcal/mol]<br>oxidative addition<br>‡ | E <sub>H</sub> [kcal/mol]<br>cuprate | E <sub>a</sub> [kcal/mol]<br>reductive<br>elimination ‡ | E <sub>H</sub> [kcal/mol]<br>product |
|-----------------------------------------------|------------------------------------------------------|--------------------------------------|---------------------------------------------------------|--------------------------------------|
| X = H                                         | 0.5                                                  | -5.5                                 | 22.0                                                    | -16.2                                |
| X = F                                         | -2.3                                                 | -9.9                                 | 23.1                                                    | -19.2                                |
| X = Me                                        | 0.4                                                  | -2.6                                 | 21.3                                                    | -17.8                                |
| X = OMe                                       | -2.0                                                 | -8.5                                 | 24.2                                                    | -23.5                                |
| X = NMe <sub>2</sub>                          | 1.8                                                  | -5.5                                 | 22.6                                                    | -18.0                                |
| PMe <sub>3</sub>                              | 1.5                                                  | -7.3                                 | 25.3                                                    | -18.4                                |

## Singlepoint structures (B3LYP-D3(BJ)/def2-TZVP//B3LYP-D3(BJ)/def2-SVP)

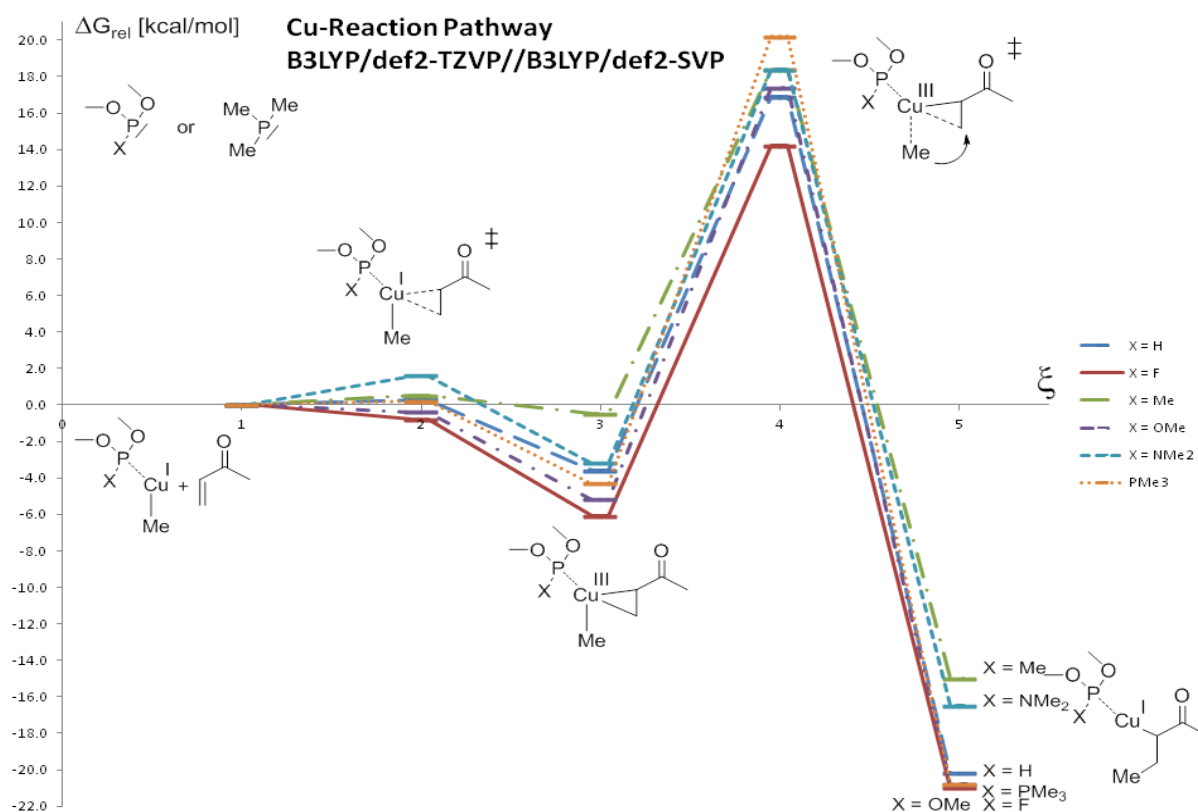

## Energy Table 2 of singlepoint structures (B3LYP-D3(BJ)/def2-TZVP//B3LYP-D3(BJ)/def2-SVP)

**Energy Table 2.** Computed reaction pathway of the MeCu-catalyzed 1,4-addition to methylvinyl ketone with six different phosphorus ligands (T = 293.15 K, B3LYP-D3(BJ)/def2-TZVP//B3LYP-D3(BJ)/def2-SVP, solvent = diethylether, ZPE scaled by 0.9896 for B3LYP-D3(BJ)/def2-TZVP and 0.9912 for B3LYP-D3(BJ)/def2-SVP [1].

| (MeO) <sub>2</sub> P-X) or<br>PMe <sub>3</sub> | E <sub>a‡</sub> [kcal/mol]<br>oxidative addition | E <sub>H</sub> [kcal/mol]<br>cuprate | E <sub>a‡</sub> [kcal/mol]<br>reductive<br>elimination | E <sub>H</sub> [kcal/mol]<br>product |
|------------------------------------------------|--------------------------------------------------|--------------------------------------|--------------------------------------------------------|--------------------------------------|
| X = H                                          | 0.3                                              | -3.6                                 | 20.5                                                   | -20.2                                |
| X = F                                          | -0.8                                             | -6.1                                 | 20.3                                                   | -21.0                                |
| X = Me                                         | 0.5                                              | -0.5                                 | 18.9                                                   | -15.0                                |
| X = OMe                                        | -0.4                                             | -5.2                                 | 22.6                                                   | -20.8                                |
| X = NMe <sub>2</sub>                           | 1.6                                              | -3.2                                 | 21.6                                                   | -16.5                                |
| PMe <sub>3</sub>                               | 0.2                                              | -4.3                                 | 24.5                                                   | -20.8                                |

## Singlepoint structures (M06-2X-D3/def2-TZVP//B3LYP-D3(BJ)/def2-SVP)

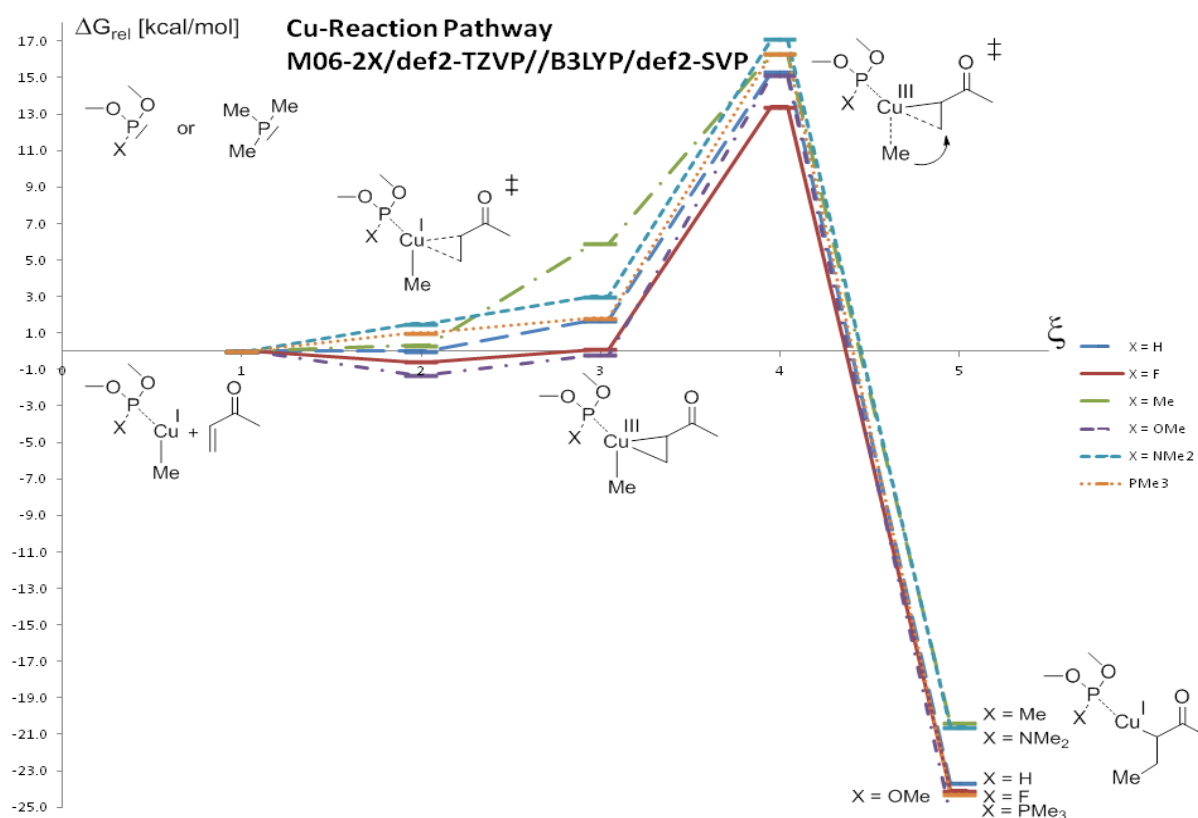

**Important:** The singlepoint structures of the M06-2X-D3/def2-TZVP//B3LYP-D3(BJ)/def2-SVP method are not appropriate for the cuprate-intermediate structure and not taken.

**Energy Table 3 of singlepoint structures (M06-2X-D3/def2-TZVP//B3LYP-D3(BJ)/def2-SVP)**

**Energy Table 3.** Computed reaction pathway of the MeCu-catalyzed 1,4-addition to methyl-vinyl ketone with six different phosphorus ligands (T = 293.15 K, M06-2X-D3/def2-TZVP//B3LYP-D3(BJ)/def2-SVP, solvent = diethylether, ZPE scaled by 0.9754 for M06-2X-D3/def2-TZVP and 0.9912 for B3LYP-D3(BJ)/def2-SVP [1].

| (MeO) <sub>2</sub> P-X) or<br>PMe <sub>3</sub> | E <sub>a</sub> [kcal/mol]<br>oxidative addition<br>‡ | E <sub>H</sub> [kcal/mol]<br>cuprate | E <sub>a</sub> [kcal/mol]<br>reductive<br>elimination ‡ | E <sub>H</sub> [kcal/mol]<br>product |
|------------------------------------------------|------------------------------------------------------|--------------------------------------|---------------------------------------------------------|--------------------------------------|
| X = H                                          | 0.0                                                  | 1.7                                  | 13.6                                                    | -23.7                                |
| X = F                                          | -0.36                                                | 0.1                                  | 13.3                                                    | -24.1                                |
| X = Me                                         | 0.3                                                  | 5.9                                  | 10.4                                                    | -20.4                                |
| X = OMe                                        | -1.3                                                 | -0.2                                 | 15.3                                                    | -25.4                                |
| X = NMe <sub>2</sub>                           | 1.5                                                  | 3.0                                  | 14.1                                                    | -20.6                                |
| PMe <sub>3</sub>                               | 1.0                                                  | 1.8                                  | 14.5                                                    | -24.3                                |

## Literature

- (a) Gaussian 16, Revision A.03, M. J. Frisch, G. W. Trucks, H. B. Schlegel, G. E. Scuseria, M. A. Robb, J. R. Cheeseman, G. Scalmani, V. Barone, G. A. Petersson, H. Nakatsuji, X. Li, M. Caricato, A. V. Marenich, J. Bloino, B. G. Janesko, R. Gomperts, B. Mennucci, H. P. Hratchian, J. V. Ortiz, A. F. Izmaylov, J. L. Sonnenberg, D. Williams-Young, F. Ding, F. Lipparini, F. Egidi, J. Goings, B. Peng, A. Petrone, T. Henderson, D. Ranasinghe, V. G. Zakrzewski, J. Gao, N. Rega, G. Zheng, W. Liang, M. Hada, M. Ehara, K. Toyota, R. Fukuda, J. Hasegawa, M. Ishida, T. Nakajima, Y. Honda, O. Kitao, H. Nakai, T. Vreven, K. Throssell, J. A. Montgomery, Jr., J. E. Peralta, F. Ogliaro, M. J. Bearpark, J. J. Heyd, E. N. Brothers, K. N. Kudin, V. N. Staroverov, T. A. Keith, R. Kobayashi, J. Normand, K. Raghavachari, A. P. Rendell, J. C. Burant, S. S. Iyengar, J. Tomasi, M. Cossi, J. M. Millam, M. Klene, C. Adamo, R. Cammi, J. W. Ochterski, R. L. Martin, K. Morokuma, O. Farkas, J. B. Foresman, and D. J. Fox, Gaussian, Inc., Wallingford CT, 2016.

For B3 see: (b) A. D. Becke, Density-functional thermochemistry. III. The role of exact exchange. *J. Chem. Phys.* 1993, **98**, 5648-5652; for LYP see: (c) C. Lee, W. Yang, R. G. Parr, Development of the Colle-Salvetti correlation-energy formula into a functional of the electron density. *Phys. Rev. B* 1988, **37**, 785-789; for VWN see: (d) S. H. Vosko, L. Wilk, M. Nusair, Accurate spin-dependent electron liquid correlation energies for local spin density calculations: a critical analysis. *Can. J. Phys.* 1980, **58**, 1200-1211; for an assembly see: (e) P. J. Stephens, F. J. Devlin, C. F. Chabalowski, M. J. Frisch, Ab Initio Calculation of Vibrational Absorption and Circular Dichroism Spectra Using Density Functional Force Fields. *J. Phys. Chem.* 1994, **98**, 11623-11627.

For def2-SVP and def2-TZVP see: (f) F. Weigend, R. Ahlrichs, Balanced basis sets of split valence, triple zeta valence and quadruple zeta quality for H to Rn: Design and assessment of accuracy. *Phys. Chem. Chem. Phys.* 2005, **7**, 3297-3305.

For M06-2X see: (g) Y. Zhao, D. G. Truhlar, The M06 suite of density functional for main group thermochemistry, thermochemical kinetics, noncovalent interactions, excited states, and transition elements: two new functional and systematic testing of four M06-class functional and 12 other functional. *Theor. Chem. Acc.* 2008, **120**, 215-241.

For TPSS see: (h) J. M. Tao, J. P. Perdew, V. N. Staroverov, G. E. Scuseria, Climbing the Density Functional Ladder: Nonempirical Meta-Generalized Gradient Approximation Designed for Molecules and Solids. *Phys. Rev. Lett.* 2003, **91**, 146401-1-146401-4.

For Grimme dispersion see: (i) S. Grimme, S. Ehrlich, L. Goerigk, Effect of the damping function in dispersion corrected density functional theory. *J. Comp. Chem.* 2011, **32**, 1456-1465.

For ZPE scale factors see: (j) M. K. Kesharwani, B. Brauer, J. M. L. Martin, Frequency and Zero-Point Vibrational Energy Scale Factors for Double-Hybrid Density Functionals (and Other Selected Methods): Can Anharmonic Force Fields Be Avoided?. *J. Phys. Chem. A* 2015, **119**, 1701-1714.

For presentation of computed structures see: (k) Y. C. Legault, CYLview, 1.0b; Université de Sherbrooke 2009 (<http://www.cylview.org>).
